# Supplementary material for: Proteomic characterization identifies clinically relevant subgroups of soft tissue sarcoma
Source: Springer Nature journal article supplement (doi:10.1038/s41467-024-45306-y), 2024-02-15
Supplement: 41467_2024_45306_MOESM2_ESM.pdf [file 41467_2024_45306_MOESM2_ESM.pdf]

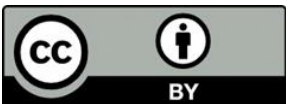

**Open Access** This file is licensed under a Creative Commons Attribution 4.0 International License, which permits use, sharing, adaptation, distribution and reproduction in any medium or format, as long as you give appropriate credit to the original author(s) and the source, provide a link to the Creative Commons license, and indicate if changes were made. In the cases where the authors are anonymous, such as is the case for the reports of anonymous peer reviewers, author attribution should be to 'Anonymous Referee' followed by a clear attribution to the source work. The images or other third party material in this file are included in the article's Creative Commons license, unless indicated otherwise in a credit line to the material. If material is not included in the article's Creative Commons license and your intended use is not permitted by statutory regulation or exceeds the permitted use, you will need to obtain permission directly from the copyright holder. To view a copy of this license, visit <http://creativecommons.org/licenses/by/4.0/>.

## REVIEWER COMMENTS

Reviewer #1 (Remarks to the Author): Expert in soft tissue sarcoma functional genomics and preclinical models

In the manuscript entitled “Proteomic characterization identifies clinically relevant subgroups of soft tissue sarcoma”, Tang et al perform proteomic analysis of 272 STSs representing 12 major subtypes. They also perform phosphoproteomics for a subset of these samples. Based on this dataset the authors accomplish interesting analyses including hierarchical sample classification, proteomic clustering classification and TME deconvolution and immune-based tumor classification. These analyses uncover interesting correlations. One being the association of SHC1 with poor prognosis in angiosarcoma (AS) and epithelial sarcoma (ES) and its potential role in phosphorylating and regulating AAD2 and CNTBB1. Another being the involvement of APEX1 and NPM1 in promote cell proliferation in one of the proteomic clusters identified (PC-Cc). The classification based on immune signatures defines three immune subtypes with distinctive tumor microenvironments.

The amount of work and analyses performed in this study is impressive. The dataset will be of interest for better understand the diversity of STS but also will provide a valuable resource for clinicians and biologist working on STS. The amount or work and analysis done is a bit overwhelming. Additionally, and although in general the paper is clear, there are some parts where the English language needs to be improved particularly in the discussion. Some comments which I think should be addressed:

1. One of the interesting aspects of this study is the inclusion of normal adjacent tissue for a number of samples. It is clear from the GO presented in supplementary Fig. 2 that this is probably enriched in normal muscle tissue. Since sarcomas can occur in many different locations and the adjacent normal tissue can be quite variable, I wonder if this was taken into consideration. Are the normal tissues primarily corresponding to muscle or is there a combination of more connective tissue types (adipose, muscle, cartilage, etc). The protein was extracted from FFPE material and the regions were probably selected based on histology?

2. It is unclear in Figure 2A how the 6 clusters were defined. Why do the authors define AS, ES, MLPS, WDLPS as two distinct clusters (HC1 and HC2), while MFS, DDLPS, othersFS and MPNST form a single cluster (HC3)? Based on the dendrogram y-axis (height) the HC3 should be further subdivided into three clusters: MFS, DDLPS (as one cluster), othersFS and MPNST. Is that correct? Or which parameters/cutoffs were used for determining the 6 HCs?

3. Line 239: “Meanwhile, \*HC1-enriched proteins (student’s t test, fold-change > 1.5, adjusted P value <=0.05) participating in pathways correlated with metabolism (as shown in figure 2C) were filtered out.

Is it supposed to be \*HC2-enriched proteins? Or did the authors filter out some of the H1-enriched proteins? This is unclear and confusing.

4. The work involves many different analyses touching on some relationships only superficially. I think to further test these models/hypotheses is out of the scope of the paper, however, the authors should take care in their concluding remarks in the results section. The findings support or are suggestive of a particular mechanism but were not functionally tested. The conclusive remarks in the result section should reflect that.

For example:

Line 283: "In sum, the upregulation of SHC1 drives poorer diagnoses of patients diagnosed with AS or ES through promoting actin cytoskeleton reorganization and epithelial cell migration by phosphorylation of ADD2 Ser2".

Although the integration between proteomics and phosphoproteomics is very interesting, and suggestive of a role for SHC1, the data shown does not directly implicate SHC1 in poor prognosis by promoting cytoskeleton reorganization or cell migration. In fact, only cell viability was measured upon SHC1 inhibition at this point in the paper. Also, the authors did to confirm that indeed SHC1 is able to phosphorylate ADD2 and later in the paper it is suggested that SHC1 regulates metastasis by phosphorylating CTNNB1 (instead or in addition?) (Fig.3K, L). This conclusion should be rephrased.

Line 458: "Taken together, our data illustrated that RIOK1 phosphorylates NPM1 on Ser125 to assist the interaction of NPM1 and APEX1 resulting in cell proliferation in PC-Cc"

Again, the authors show increase proliferation by NPM1 overexpression, and that NPM1 interacts with APEX1 but the rest of the data is correlative.

5. The TME deconvolution analysis suggests some interesting relationships. Since this type of analysis is usually done from transcriptomic data, I wonder to what extent is well established for proteome analysis. Was this validated with an alternative deconvolution method or by a couple of IHC markers to validate enrichment of immune cell populations in some of the samples analyzed?

6. The discussion is too long and has some paragraphs that are not well written. See for example the paragraph starting on line 647.

7. Although the last integrative analysis presented in Figure 6 brings together the different aspects analyzed in this study, it is unclear what it means in the perspective of heterogeneity of STS subtypes. Some subtypes are enriched in specific proteomic clusters which are then enriched in different immune signatures, but still, there is a lot of variability on how HC are distributed.

8. There are some typos and some sentences are not well constructed or are unclear. This is particularly noticeable in the discussion. Some examples below:

Line 73. "A potential explanation is that these mechanisms could not reflect the functional effects, as they reside many regulatory layers away from the protein."

Line 106. "It is necessarily required for immune therapy that more detailed information about the characteristics of immune infiltration and the effective immune components."

Line 594. "When considering targeting the molecular in the TGF $\beta$  signaling pathway (such as SHC1), ES might have a similar response with AS."

Minor comments:

1. Line 257: "We found the activity level of two pathways enriched in HC1, actin cytoskeleton reorganization (Pearson's correlation,  $r = 0.21$  pvalue = 0.0049) and epithelial cells migration (Pearson's correlation,  $r = 0.22$  p value = 0.0027), changed \*tightly followed the abundance variation of SHC1 (Figure 2F).

I would not say there is a \*tight correlation between SHC1 abundance and Epithelial cell migration. It is just a correlation.

2. Fig. 2K it would be better to show in the plot the IC50 of all cell lines individually and they are only 6.

3. The literature references are not always correct. For example, reference for CellX should be 62 (not 63 as mentioned in the text).

Reviewer #2 (Remarks to the Author): Expert in tumour immunology and immune landscapes in sarcoma

The present study undertakes a comprehensive proteomic profiling of 272 STS patients representing 12 major subtypes.

The authors identify six subtypes on the base of hierarchical classification, three subtypes based on proteomic analysis and three subtypes based on immune signatures. For some clusters they identified some mechanism/s relevant for patient prognosis. Interestingly, some of the main mechanisms identified with bioinformatics approaches are verified by wet laboratory experiments.

The study provides a valuable proteomic resource for the scientists working on sarcomas. The study is correctly written, although the logic of the analyzes carried out is not always fluent and sometimes it is difficult to follow.

Moreover, there are some concerns:

1) The three main clustering analysis should be performed also taking into account the anatomical site distribution and the therapies applied to the patients, in order to verify if the clustering may be influenced by the location of the tumor or by the therapy.

2) in figure 5A complement and coagulation cascade pathways are enriched in the IM-S-1 cluster corresponding to the stroma-enriched subtype and B cells in the IM-S-2. Results already published on the role of complement activation and B cells in sarcomas (doi: 10.1038/s43018-021-00173-0 and doi: 10.1038/s41586-019-1906-8) should be mentioned and discussed. Are the main findings of these two papers true by proteomic point of view? For example, is the C3aR or complement soluble proteins/receptors expression associated with M2-like macrophages and/or UPS patient survival? Are B cell markers associated with increased overall survival? Do they correlate with metastasis?

3) The authors should discuss some limitations of the study, such as:

- the requirement of future validation in independent cohorts.

- considering the extensive intra-tumoural heterogeneity, the inability of bulk proteomic approach to dissect the contribution of distinct heterogenous tumour regions.

- the study is based on localised disease, thus it will have to be determined if these findings will be true also for locally relapsed and metastatic tumours.

Reviewer #3 (Remarks to the Author): Expert in MS-based cancer proteomics

Comments on “Proteomic characterization identifies clinically relevant subgroups of soft tissue sarcoma” by Tang et al.

The authors present proteome data from 272 soft tissue sarcoma tissues and 91 matched tumor-adjacent tissues (total of 363 samples). In addition, phosphoproteome data were generated from 138 sarcoma and 24 tumor-adjacent tissues. Data analysis is based on clustering the data, extract functional predictions from the clusters, and follow-up with some cell line experiment to understand the role of top-scoring proteins in the specific functional categories. The authors are - in general – overstating the evidence from the molecular mechanisms they are interrogating (see comments). Overall, I did not find the study to be very exciting. I think that Nature Communications is a good place for resource-style papers like this, and proteomics studies on soft tissue sarcoma have the potential to help us better understand the diseases and to identify new treatment strategies. Also, 361 sample is a quite large number. What I am missing is evidence that proteomics is adding crucial information beyond what we know about the disease. I also think that the follow-up experiments need more depth. I am on the fence regarding recommending to consider a publication after major revisions, but I am happy to look the manuscript after the below comments have been addressed.

(1) The authors state that 15,552 proteins were identified across all samples with an average of 5,593 proteins being quantified per sample on average. It is very unlikely that 5.5 k proteins per sample using unfractionated sample leads to a total of > 15 k proteins across 363 samples. I wonder if the false-discovery filtering at the protein level was done for each individual sample but not for all datasets combined. It is the latter, that should have been done. Merely filtering for each individual run will greatly inflate the protein FDR for the entire dataset (as false assignments will be different for each run). It is also not clear if a parsimony filtering was used on the identified proteins. This should also be done the combined dataset. The same question applies to the phosphoproteomics analysis: was the filtering done on the combined dataset (which it should have been) or only on each individual dataset?

(2) Peptides/proteins were quantified using a label-free approach (iBAQ). Reproducibility is shown in Supp Fig 1 A. I would like to see the median CV across all the HEK standard samples as well as the CV in dependence to the signal-to-noise ratio.

(3) Supp Fig 2 A. The PCA plot shows quite an overlap of NAs and tumor samples. It would be great to see a unsupervised clustering of NAs and tumor sample and some cluster purity measurement to evaluate the separation of tumor and normal samples.

(4) What criteria were used to define the clusters (HC1-6)? This is not clear based on the dendrogram alone. The dendrogram implies that there was very clean clustering histological subtypes. I am missing a plot showing how well the subtypes were separated from each other using unsupervised clustering (see also comment 3).

(5) line 250. A correlation between TGFbeta proteins and SHC1 does not necessarily mean that SHC1 plays a key role in TGFbeta signaling. It may suggest that it plays a role, but this needs more evidence. This should be re-worded.

(6) Line 283: In sum, .... None of that is shown with enough evidence. The language should be toned down. Higher kinase expression does not necessarily mean higher kinase activity. Did ADD2 S2 phosphorylation level drop with inhibition of SHC1? How specific is the inhibitor. What is the kinase phosphorylating ADD S2?

(7) Fig 3 and Supp Fig 6: Is the inhibition of SHC1 and MAPK10 affecting the phosphorylation levels at CTNNB1Ser552 and Ser675?

(8) Fig 7P and line 457. There is lots of evidence missing for RIOK1 phosphorylating NPM1 and thereby regulating the interaction of APEX1 and NPM1. Does inhibition/KD of the kinase affect the phosphorylation level (phosphoproteomics, WB)? Does the inhibition affect the interaction of the 2 proteins (IP-MS, WB)? Does it affect the co-regulation of the two proteins (proteomics)?

(9) Fig 7O and line 527: Evidence is missing. Does inhibition/KD of MAPK10 affect the CTNNB1 Ser657 phosphorylation level. Does the inhibition of MAPK10 in cells derived from the according strain affect immune infiltration (xenograft model)?

(10) As the control samples are matched tumor-adjacent tissue, the authors may consider comparing sarcoma and control tissue in a patient-specific manner to better understand tumor/normal differences (does it matter if I normalize the sarcoma proteome by the adjacent tissue proteome for each patient, rather than compare all control samples with all sarcoma samples?).

Minor comments:

(a) The KSEA algorithm should be cited in the main text when stating that kinase-substrate networks were generated.

1 **Reviewer #1 (Remarks to the Author): Expert in soft tissue sarcoma functional**  
2 **genomics and preclinical models**

3  
4 **In the manuscript entitled “Proteomic characterization identifies clinically**  
5 **relevant subgroups of soft tissue sarcoma”, Tang et al perform proteomic analysis**  
6 **of 272 STSs representing 12 major subtypes. They also perform**  
7 **phosphoproteomics for a subset of these samples. Based on this dataset the authors**  
8 **accomplish interesting analyses including hierarchical sample classification,**  
9 **proteomic clustering classification and TME deconvolution and immune-based**  
10 **tumor classification. These analyses uncover interesting correlations. One being**  
11 **the association of SHC1 with poor prognosis in angiosarcoma (AS) and epithelial**  
12 **sarcoma (ES) and its potential role in phosphorylating and regulating AAD2 and**  
13 **CNTBB1. Another being the involvement of APEX1 and NPM1 in promote cell**  
14 **proliferation in one of the proteomic clusters identified (PC-Cc). The classification**  
15 **based on immune signatures defines three immune subtypes with distinctive tumor**  
16 **microenvironments.**

17  
18 **The amount of work and analyses performed in this study is impressive. The**  
19 **dataset will be of interest for better understand the diversity of STS but also will**  
20 **provide a valuable resource for clinicians and biologist working on STS. The**  
21 **amount or work and analysis done is a bit overwhelming. Additionally, and**  
22 **although in general the paper is clear, there are some parts where the English**  
23 **language needs to be improved particularly in the discussion. Some comments**  
24 **which I think should be addressed:**

25 **Response:**

26 **We are grateful for the constructive comments that the reviewer has provided, which**  
27 **truly help us in improving our work. In this revision, according to the reviewer’s**  
28 **comments, we have conducted a deeper bioinformatic analysis, performed a series of**  
29 **functional experiments, and also revised the manuscript carefully. We have provided**  
30 **specific point-to-point response as follows:**

31



32 **1. One of the interesting aspects of this study is the inclusion of normal adjacent**  
33 **tissue for a number of samples. It is clear from the GO presented in supplementary**  
34 **Fig. 2 that this is probably enriched in normal muscle tissue. Since sarcomas can**  
35 **occur in many different locations and the adjacent normal tissue can be quite**  
36 **variable, I wonder if this was taken into consideration. Are the normal tissues**  
37 **primally corresponding to muscle or is there a combination of more connective**  
38 **tissue types (adipose, muscle, cartilage, etc). The protein was extracted from FFPE**  
39 **material and the regions were probably selected based on histology?**

40 **Response:**

41 We appreciate the reviewer's constructive comments. We apologize for the unclear  
42 description of the sample collection and assessments and the neglected presentation of  
43 how we performed a comparative analysis between tumors and normal tissues adjacent  
44 to tumor (NAT). To systematically respond to the comment, we divided the responses  
45 into two parts:

46  
47 **1. The criteria for sample collection and assessment**

48 In this study, for tumor samples, 272 formalin-fixed, paraffin-embedded (FFPE)  
49 sarcoma tumor tissues and 91 paired NATs were acquired from Zhongshan Hospital,  
50 Fudan University from 2010 to 2019. One 4 µm thick slide from each FFPE block was  
51 sectioned and stained by hematoxylin and eosin (H&E) for histological evaluation.  
52 Specifically, each tumor/ tumor-adjacent sample was checked by three expert  
53 pathologists to confirm the sample quality according to the following criteria:

54  
55 For tumor samples: (1) pathologists evaluated and defined tumor area on the slices of  
56 FFPE specimens with tumor cell ratio (tumor purity) > 90%; (2) the histological  
57 subtypes of sarcoma were diagonalized by pathologists according to WHO  
58 classification of soft Tissue & Bone tumor (*Adv Anat Pathol*, PMID: 32960834).

59  
60 For NAT samples: (1) pathologists evaluated and defined the tumor-adjacent areas on  
61 the slices of FFPE specimens with no observed tumor cells; (2) for different histological  
62 sarcoma subtypes, NATs were chosen based on tumor locations and the original

63 lineages of tumors, according to WHO classification of soft Tissue & Bone tumor (*Adv*  
64 *Anat Pathol*, PMID: 32960834). The specific NATs for different histological sarcomas  
65 were presented in **Table RL1**. The representative H&E-stained slices showed the  
66 regions of tumors with their paired NATs, which confirmed the NAT types for  
67 distinctive tumors, and also indicated over 90% of tumor cellular purities for tumor  
68 regions, and no tumor cells in NATs (**Figure RL1**). Moreover, the same NAT collecting  
69 criteria were also utilized by previous published sarcoma studies (*Cell*,  
70 PMID:29100075; *Nature Genetics*, PMID:20601955; *Curr Treat Options Oncol*,  
71 PMID: 35171456; *Cancer Research*, PMID:17638873).

72

73 **Table RL1. The histological subtypes of sarcoma and tissue types of their paired NATs**

| Tumors                                | NATs                   |
|---------------------------------------|------------------------|
| WDLPS                                 | Lipid tissue           |
| MLPS                                  | Lipid tissue           |
| DDLPS                                 | Lipid tissue           |
| AS                                    | Connective tissue      |
| UPS                                   | Connective tissue      |
| MFS                                   | Connective tissue      |
| otherFS                               | Connective tissue      |
| LMS (gastrointestinal tract & uterus) | Smooth muscle tissue   |
| LMS (other organs)                    | Connective tissue      |
| RMS                                   | Skeletal muscle tissue |
| MPNST                                 | Nerve tissue           |
| SS                                    | Connective tissue      |
| ES                                    | Connective tissue      |

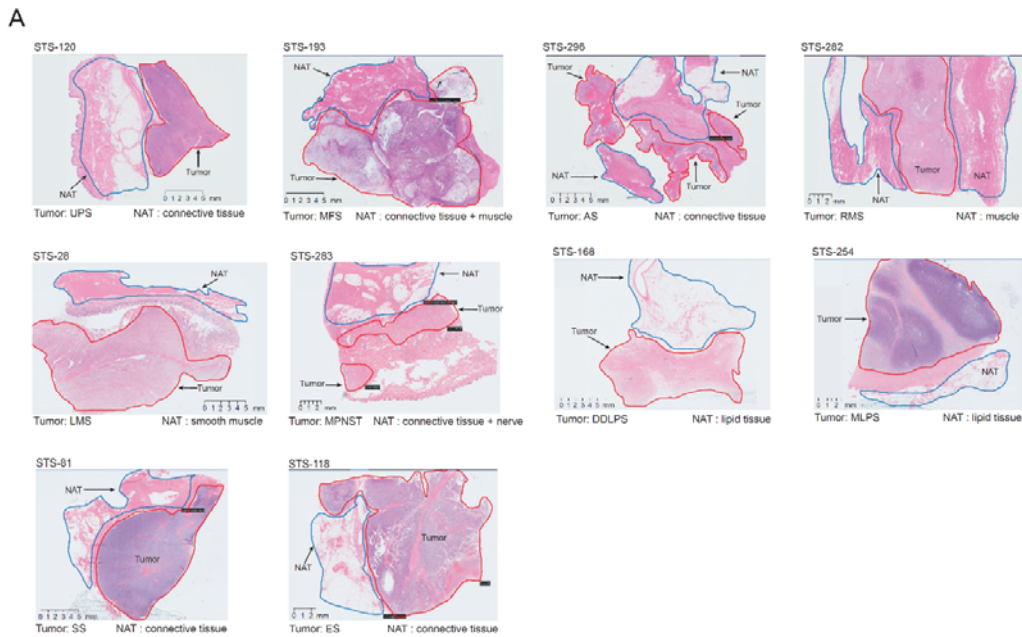

**Figure RL1. The criteria for sample collection and assessments**

74

75 (A) H&E-stained slices presents the regions of tumor and paired NATs. Different histological  
 76 subtypes have distinguished tissue types of NATs.

77

## 78 **2. The molecular features of tumors and NATs**

79 In our previous version, to investigate the common molecular features of sarcoma  
 80 tumors and NATs, we conducted a comparative analysis between all tumor tissues and  
 81 all NATs. As a result, Gene Ontology (GO) enrichment analysis based on proteomic  
 82 data revealed that proteins of some classical oncogenic pathways, including RNA  
 83 splicing, NF-kappaB signaling, JNK cascade, and cell growth were significantly  
 84 elevated in tumor samples, whereas, the protein participating in ATP metabolic process,  
 85 glycogen metabolic process, and actin filament organization were decreased in tumor  
 86 samples.

87

88 In the revision, following the reviewer's suggestion, we performed pair-wised tumors  
 89 and NATs comparative analysis among 12 histological sarcoma subtypes to clearly  
 90 elucidate the molecular features of different histological tumor subtypes and features  
 91 of their corresponding NATs. As a result, besides the common features of sarcoma  
 92 tumors such as cell cycle, NF-kappaB signaling pathway, and the general characteristics  
 93 of NATs such as ATP metabolic process, we observed the distinctive features of

94 different histological sarcoma tumors and their corresponding NATs (**Table RL2**). For  
95 instance, the pathways enriched in WDLPS included the VEGFA & VEGFR2 signaling  
96 pathway and HOXA1 target signaling pathway, whereas pathways enriched in its pair-  
97 wised NATs (lipid tissues) included organic acid catabolic process, carboxylic acid  
98 catabolic process, and ATP synthesis coupled electron transport. Meanwhile, the  
99 pathways enriched in RMS include MYC targets up, signaling by interleukins and DNA  
100 replication, while, pathways enriched in their pair-wised NATs (skeletal muscle tissues)  
101 were muscle system processing, muscle contraction, etc. Along with these findings, the  
102 pathways dominantly enriched in MPNST were MAPK cascade, P53 regulation  
103 pathway, and cell cycle, whereas pathways enriched in its pair-wised NATs (nerve  
104 tissues) were intermediate filament organization and collagen fibril organization. The  
105 specific pathways for distinctive tumors and NATs were listed as follows:

106 **Table RL2. Significantly enriched pathways in NAT tissue and tumor tissue for each**  
107 **histological subtype**

|         | NAT                                                 |          | Tumor                                              |          |
|---------|-----------------------------------------------------|----------|----------------------------------------------------|----------|
|         | Pathway                                             | p value  | Pathway                                            | p value  |
| DDLPS   | intermediate filament organization                  | 7.61E-10 | cell cycle                                         | 2.55E-07 |
|         | cellular lipid catabolic process                    | 5.08E-09 | MTORC1 mediated signalling                         | 2.83E-07 |
|         | lipid catabolic process                             | 3.09E-08 | PI3KCI pathway                                     | 7.89E-06 |
|         | lipid modification                                  | 9.68E-07 | AKT targets                                        | 1.18E-05 |
| MLPS    | actomyosin structure organization                   | 3.71E-07 | MYC targets up                                     | 1.07E-12 |
|         | myofibril assembly                                  | 3.01E-06 | complement and coagulation cascades                | 1.18E-10 |
|         | striated muscle cell development                    | 3.19E-06 | PTEN regulation                                    | 2.75E-08 |
|         | muscle contraction                                  | 8.83E-06 |                                                    |          |
| LMS     | actin filament capping                              | 1.22E-07 | MYC targets up                                     | 7.01E-28 |
|         | regulation of actin filament depolymerization       | 1.43E-07 | PDGFRB pathway                                     | 1.14E-21 |
|         | regulation of actin filament polymerization         | 4.03E-06 | metastasis up                                      | 1.19E-20 |
|         | regulation of actin filament length                 | 4.57E-06 | focal adhesion                                     | 2.66E-20 |
| UPS     | energy derivation by oxidation of organic compounds | 3.86E-29 | MYC targets up                                     | 4.33E-38 |
|         | ATP synthesis coupled electron transport            | 3.64E-27 | B cell receptor signaling pathway                  | 2.49E-11 |
|         | electron transport chain                            | 6.5E-27  | T cell receptor signaling pathway                  | 1.53E-08 |
|         | ATP metabolic process                               | 2.14E-20 | cell cycle M to G1                                 | 2.59E-08 |
| WDLPS   | organic acid catabolic process                      | 6.41E-25 | transport to the golgi and subsequent modification | 5.07E-24 |
|         | carboxylic acid catabolic process                   | 6.41E-25 | VEGFA&VEGFR2 signaling pathway                     | 4.2E-23  |
|         | ATP synthesis coupled electron transport            | 1.54E-23 | HOXA1 targets up                                   | 1.35E-13 |
|         | purine ribonucleotide metabolic process             | 1.33E-19 |                                                    |          |
| MFS     | muscle contraction                                  | 2.86E-23 | protein targeting to membrane                      | 5.11E-42 |
|         | muscle system process                               | 5.83E-23 | MYC targets up                                     | 8.33E-32 |
|         | myofibril assembly                                  | 5.91E-13 | TGFB1 targets up                                   | 2.16E-17 |
|         | muscle cell development                             | 2.32E-12 | PI3KCI pathway                                     | 1.21E-08 |
| ES      | primary alcohol metabolic process                   | 4.81E-11 | selective autophagy                                | 5.19E-11 |
|         | olefinic compound metabolic process                 | 1.59E-09 | Rho GTPase effectors                               | 4.14E-05 |
|         | fatty acid metabolic process                        | 3.13E-09 | Notch1 targets up                                  | 1.69E-04 |
|         | hormone metabolic process                           | 3.96E-09 | TGFB1 targets up                                   | 6.14E-04 |
| SS      | positive regulation of cell adhesion                | 1.8E-20  | ribosome biogenesis                                | 8.01E-26 |
|         | leukocyte mediated immunity                         | 5.72E-18 | translational initiation                           | 2.94E-23 |
|         | reactive oxygen species metabolic process           | 2.34E-17 | DNA replication                                    | 5.32E-14 |
|         | regulation of cell-cell adhesion                    | 2.91E-17 | DNA conformation change                            | 4.14E-10 |
| AS      | energy derivation by oxidation of organic compounds | 3.8E-13  | stabilization of P53                               | 3.69E-09 |
|         | electron transport chain                            | 1.09E-11 | VEGFA&VEGFR2 signaling pathway                     | 4.78E-07 |
|         | aerobic respiration                                 | 5.57E-11 | collagen fibril organization                       | 5.2E-06  |
|         | oxidative phosphorylation                           | 8.62E-11 | TGFβ receptor signaling in EMT                     | 4.92E-05 |
| MPNST   | intermediate filament organization                  | 1.57E-54 | MAPK cascade                                       | 1.16E-08 |
|         | electron transport chain                            | 3.16E-12 | P53 regulation pathway                             | 3.27E-06 |
|         | extracellular matrix organization                   | 2.59E-08 | cell cycle                                         | 2.60E-04 |
|         | collagen fibril organization                        | 7.36E-08 |                                                    |          |
| otherFS | intermediate filament organization                  | 1.63E-26 | BRCA1 targets up                                   | 1.43E-16 |
|         | muscle contraction                                  | 3.95E-20 | MYC targets up                                     | 1E-15    |
|         | muscle system process                               | 2.46E-18 | TGFB1 targets up                                   | 2.85E-15 |
|         | cell-substrate adhesion                             | 9.71E-15 | DNA replication                                    | 1.91E-07 |
| RMS     | muscle system process                               | 1.26E-16 | MYC targets up                                     | 1.27E-33 |
|         | muscle contraction                                  | 8.34E-16 | signaling by interleukins                          | 1.81E-21 |
|         | muscle cell development                             | 1.26E-08 | interleukin1 signaling                             | 1.11E-17 |
|         | muscle filament sliding                             | 1.68E-07 | DNA replication                                    | 5.72E-08 |

108 The above results indicated that besides the common features of sarcoma tumors (cell  
109 proliferation, MAPK signaling pathways, etc.) and NATs (ATP metabolic process),  
110 pair-wised comparative analysis revealed specific features for distinctive histological  
111 sarcomas and their corresponding NATs. In the revision, besides the common features  
112 of tumors and NATs which have been described in our previous version, we have added  
113 the distinguished features of different histological sarcoma tumor types and their  
114 corresponding NATs in the “**Result**” section, on lines 127-144 and 201-213. Moreover,

115 we carefully checked our previous version of the manuscript, and in our research, the  
116 omics data of NATs were utilized to investigate the differential expression features of  
117 sarcoma tumors and NATs (supplementary figure2 in the previous version), thus we  
118 have updated the supplementary figure 2 accordingly. Also, we have added the criteria  
119 for selection and assessment of NATs in the “**Method**” section on lines 933-960 in the  
120 revised manuscript.

121

122 **2. It is unclear in Figure 2A how the 6 clusters were defined. Why do the authors**  
123 **define AS, ES, MLPS, WDLPS as two distinct clusters (HC1 and HC2), while MFS,**  
124 **DDLPS, othersFS and MPNST form a single cluster (HC3)? Based on the**  
125 **dendrogram y-axis (height) the HC3 should be further subdivided into three**  
126 **clusters: MFS, DDLPS (as one cluster), othersFS and MPNST. Is that correct? Or**  
127 **which parameters/cutoffs were used for determining the 6 HCs?**

128 **Response:**

129 We thank the reviewer for the critical comment. We apologize for the unclear  
130 presentation of the clustering cutoffs and details in our previous manuscript. To  
131 systematically respond to the comment, we will address this comment from 3 aspects:

- 132 1. The process to create the dendrogram;
- 133 2. The criteria to determine the cluster number;
- 134 3. Biological insights based on hierarchical clusters.

135

### 136 **1. The process to create the dendrogram**

137 To investigate the intrinsic common features of STS histological subtypes, we  
138 employed hierarchical clustering on the 12 STS histologic subtypes. R (version 4.2.0)  
139 and the R package “factoextra” (version 1.0.7) were utilized for data process and  
140 visualization.

141

142 Firstly, we performed ANOVA analysis to filter proteins with high variable values  
143 among different histology subtypes. The protein expression matrix had been processed  
144 as described in the “**Method**” section of the manuscript. 2536 proteins were finally  
145 filtered out with significant variance among histological subtypes (p-value  $\leq 0.001$ ).

146 Then, we calculated the mean values of these filtered proteins for each sarcoma  
147 histology subtype. The “Pearson” distances between each two subtypes were calculated  
148 utilizing these mean values (**Supplementary Table 2**). Next, based on the “Pearson”  
149 distances, we created the dendrogram with “hclust” and “fviz\_dend” functions in R  
150 using default parameters (**Figure RL2A**).

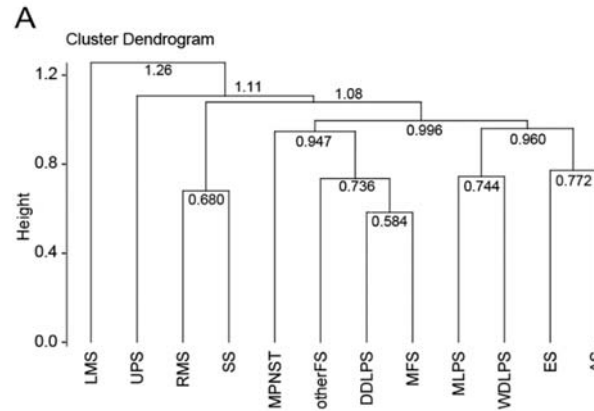

151 **Figure RL2. Process and details of hierarchical clustering**

152 (A) The cluster dendrogram of 12 histological subtypes of sarcoma

153

## 154 2. The criteria to determine the cluster number

155 The cluster number of hierarchical clustering is determined by the height where the  
156 cluster dendrogram is cut. To find the appropriate cluster number (k), we cut the cluster  
157 dendrogram at different heights to get the cluster numbers from 2 to 10 (**Figure RL2B**).  
158 Referring to previous research, we utilized the silhouette coefficient to estimate the  
159 similarity of samples in one cluster and the difference of samples among different  
160 clusters. The silhouette coefficients reached the peak when the cluster number was 5 or  
161 6 (**Figure RL2C**).

162

163 To further investigate the clinical availability of our hierarchal cluster, we evaluated the  
164 association between hierarchal clustering with patients’ prognosis. As a result, when the  
165 cluster number is 6, patients belonging to different clusters presented distinguished  
166 overall survival time (log-rank test,  $p < 0.03$ ) (**Figure RL2D**), suggesting its potential  
167 clinical utilization. Therefore, we cut the dendrogram at 0.95 and clustered the 12  
168 histological subtypes of sarcoma into 6 subgroups: HC1 (AS and ES), HC2 (MLPS and  
169 WDLPS), HC3 (MFS, DDLPS, and otherFS), HC4 (RMS and SS), HC5 (UPS), and

170 HC6 (LMS) (Figure RL2E).

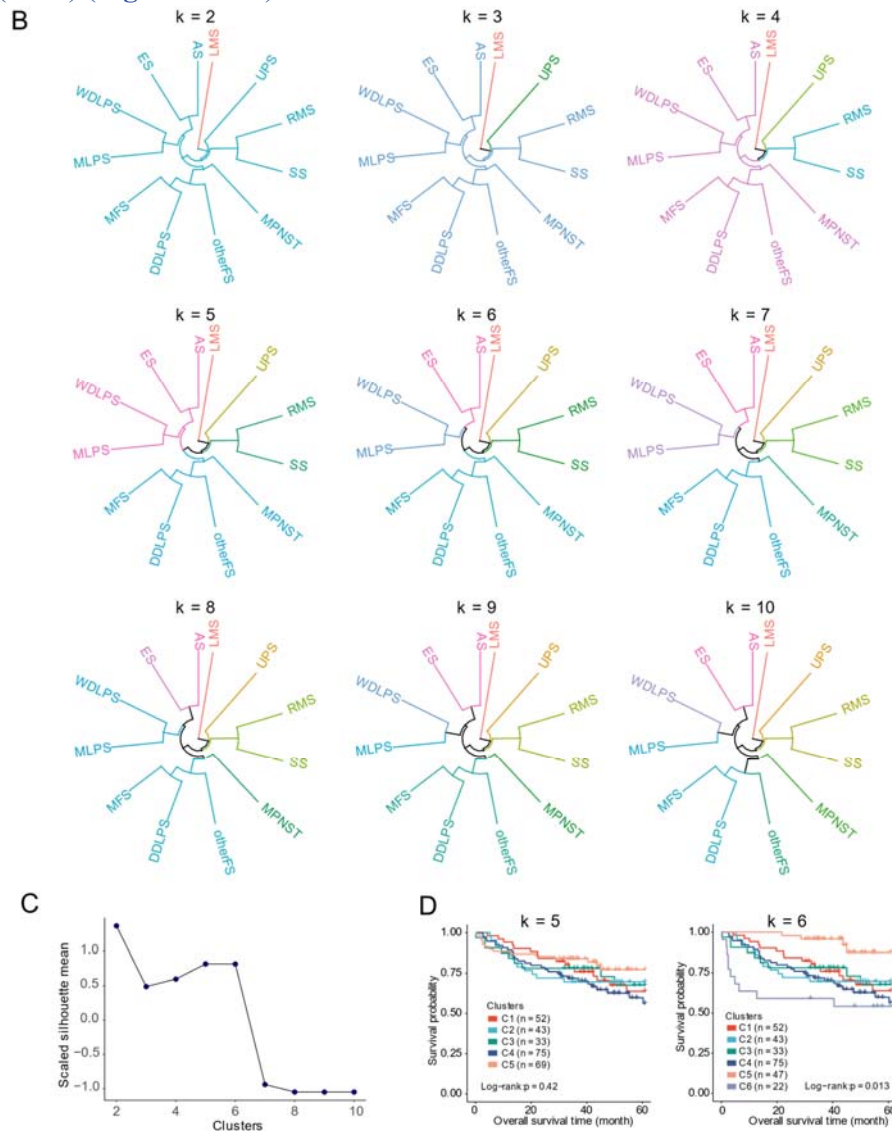

171 **Figure RL2.** (B) The circled cluster dendrograms of sarcoma histological subtypes with cluster

172 numbers from 2 to 10. (C) The scaled mean values of silhouette coefficients for different cluster

173 numbers. (D) Kaplan-Meier curves for overall survival times when cluster number is 5 or 6.

174



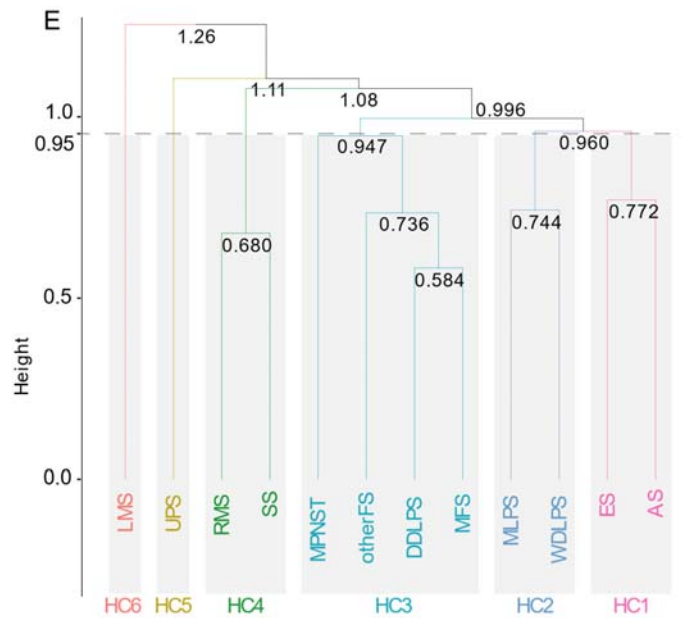

175 **Figure RL2 (E)** Cluster dendrogram for hierarchical clustering when cluster number is 6

176

### 177 **3. Biological insights based on hierarchical clusters**

178 Besides clinical availability, our HC clustering showed strong biological relevance,  
 179 each subgroup showed distinctive biological features, helping to uncover the intrinsic  
 180 common features of different histological subtypes belonging to the same hierarchical  
 181 cluster. Particularly, in our previous version, we found that HC1 contains AS and ES,  
 182 both of which could be distinguished from other clusters with elevated expression of  
 183 SHC1-TGF  $\beta$  signaling pathways.

184

185 In the revision, we conducted further analysis to investigate how hierarchical clusters  
 186 could decipher the common features and heterogeneity among 12 histological subtypes  
 187 of sarcoma. As a result, we found that our hierarchical clustering divided the lipid  
 188 sarcoma (WDLPS, MLPS, and DDLPS) into two clusters. Particularly, DDLPS were  
 189 clustered together with fibrosarcomas (MFS and otherFS) and MPNST in HC3.  
 190 WDLPS and MLPS were clustered into another cluster (HC2). Considering different  
 191 differentiation levels of WDLPS, MLPS, and DDLPS, these findings revealed the  
 192 difference of tumor differentiation within lipid sarcomas might lead to the diverse  
 193 molecular features between DDLPS and WDLPS, further implying that the degree of  
 194 tumor differentiation might serve as an important factor in determining the molecular

195 features of sarcomas within lipid sarcomas. Because DDLPS is more metastatic and  
 196 proliferative than WDLPS (*Adv Anat Pathol*, PMID: 32960834), we compared the ratio  
 197 of KI67-positive tumor cells in WDLPS and DDLPS. DDLPS showed an obviously  
 198 higher ratio of KI67-positive tumor cells than WDLPS (**Figure RL2F**). Consistently,  
 199 HC3 also presented the higher ratio of KI67-positive tumor cells than HC2, implying  
 200 that HC3 featured fast cell proliferation characteristics (**Figure RL2F**).

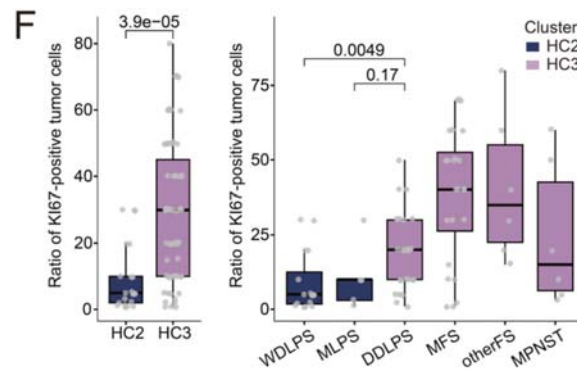

201 **Figure RL2.** (F) Boxplots illustrating the ratio of KI67-positive tumor cells in HC2 and HC3  
 202 (left) and histological subtypes belonging to HC2/HC3 (right).

203  
 204 GSVA analysis revealed that DDLPS (HC3) could be distinguished from WDLPS and  
 205 MLPS (HC2) by elevated enrichments of Rab pathway (**Figure RL2G-H**). The  
 206 elevated protein expression of Rab GTPases including RAB14, RAB5A, RAB2A, etc.  
 207 in HC3 confirmed the increased Rab pathway in HC3 (**Figure RL2I**).

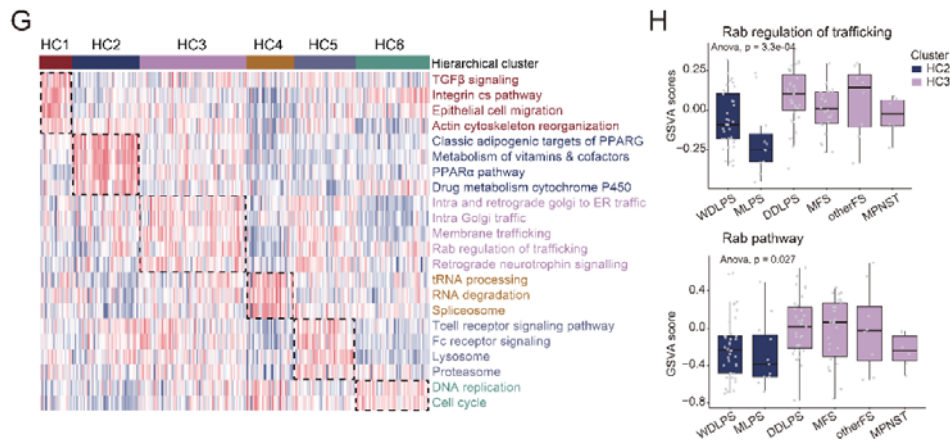

208 **Figure RL2.** (G) The heatmap of specifically enriched pathways in hierarchical clusters; (H)  
 209 Boxplots showing GSVA scores of Rab regulation of trafficking and Rab pathway in  
 210 histological subtypes belonging to HC2/HC3.

211

212 Moreover, among the Rab GTPases that showed elevated expression in HC3, we  
213 observed that the protein abundance of RAB2A and RAB14 were significantly  
214 correlated with patients' prognosis (**Figure RLJ**).

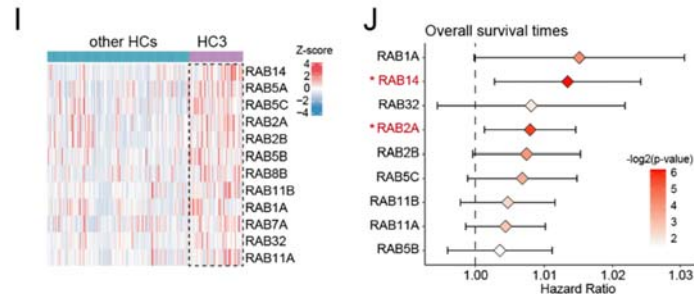

215 **Figure RL2.** (I) The heatmap presenting Rab GTPases enriched in HC3; (J) The forest plot  
216 showing the hazard ratios of Rab GTPases enriched in HC3.

217

218 Previous researches have reported that Rab GTPases participated in cell autophagy  
219 (*Cell Death Differ*, PMID: 24440914; *Cell Biosci*, PMID: 33557950). RAB2A has  
220 been proved to regulate the formation of autophagosome and autolysosome (*Autophagy*,  
221 PMID: 30957628). Researches have indicated that the elevated autophagy might be  
222 associated with tumor proliferation (*Clin Cancer Res*, PMID: 26567363), we then  
223 hypothetically assumed that the elevated autophagy might lead to significantly fast  
224 tumor cell proliferation and cell proliferation index in HC3.

225

226 Aim to confirm this assumption, we compared the autophagy pathway between HC2  
227 and HC3, and found that both the autophagy pathway enrichment scores as well as  
228 autophagy markers (ATG5, ATG7, MTOR, WIPI1) showed elevation in HC3 than HC2  
229 (**Figure RL2K-M**). Moreover, proliferation index of sarcoma is both correlated with  
230 protein expression of RAB2A and autophagy pathway GSEA scores (**Figure RL2N**).  
231 These findings illustrated that comparing to WDLPS and MLPS which belong to HC3,  
232 DDLPS, which belongs to HC2, showed fast tumor cell proliferation features, which  
233 might be caused by the RAB2A-associated autophagy process.

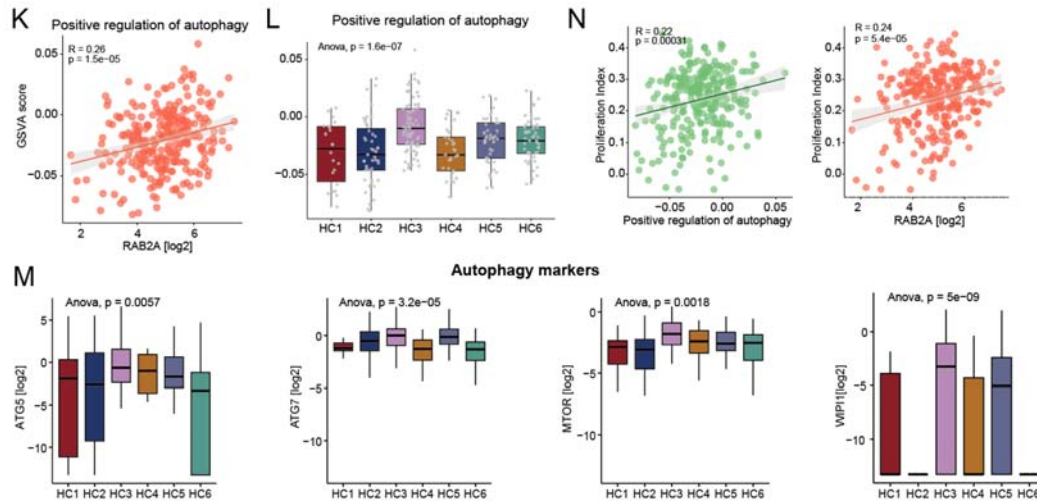

234 **Figure RL2.** (K) The scatter plot presenting the positive correlation between RAB2A and  
 235 autophagy pathway; (L) The boxplot presenting the enrichment scores of autophagy in different  
 236 clusters; (M) Boxplots presenting the abundances of autophagy markers in different clusters;  
 237 (N) The scatter plot presenting the positive correlation between proliferation index and  
 238 autophagy pathway (left) or abundance of RAB2A (right)

239

240 In sum, our hierarchical clustering showed clinical relevance and could help to illustrate  
 241 the common features among different histological sarcomas and could further decipher  
 242 the distinctive biological features of lipid sarcomas varies with degrees of  
 243 differentiation. In the revised manuscript, we have updated the methods for hierarchical  
 244 clustering in the “**Methods**” section and updated our analysis on the HC2 and HC3 in  
 245 the “**Result**” section (line297-330). Also, we updated **Figure RL2** in the revised  
 246 **Figure2, Supplementary Figure 8&9.**

247

248 **3. Line 239: “Meanwhile, \*HC1-enriched proteins (student’s t test, fold-change >**  
 249 **1.5, adjusted P value <=0.05) participating in pathways correlated with**  
 250 **metabolism (as shown in figure 2C) were filtered out.**

251 **Is it supposed to be \*HC2-enriched proteins? Or did the authors filter out some of**  
 252 **the H1-enriched proteins? This is unclear and confusing.**

253 **Response:**

254 We thank the reviewer for the comment and apologize for the incorrect phrasing of line  
 255 239. We have revised the manuscript as follows: “Meanwhile, HC2-enriched proteins

256 (student's t-test, fold-change > 1.5, adjusted p-value <= 0.05) participating in pathways  
257 correlated with metabolism (as shown in Figure 2C) were filtered out.”

258

259 **4. The work involves many different analyses touching on some relationships only**  
260 **superficially. I think to further test these models/hypotheses is out of the scope of**  
261 **the paper, however, the authors should take care in their concluding remarks in**  
262 **the results section. The findings support or are suggestive of a particular**  
263 **mechanism but were not functionally tested. The conclusive remarks in the result**  
264 **section should reflect that.**

265

266 **For example:**

267 **Line 283: “In sum, the upregulation of SHC1 drives poorer diagnoses of patients**  
268 **diagnosed with AS or ES through promoting actin cytoskeleton reorganization and**  
269 **epithelial cell migration by phosphorylation of ADD2 Ser2”.**

270

271 **Although the integration between proteomics and phosphoproteomics is very**  
272 **interesting, and suggestive of a role for SHC1, the data shown does not directly**  
273 **implicate SHC1 in poor prognosis by promoting cytoskeleton reorganization or**  
274 **cell migration. In fact, only cell viability was measured upon SHC1 inhibition at**  
275 **this point in the paper. Also, the authors did to confirm that indeed SHC1 is able**  
276 **to phosphorylate ADD2 and later in the paper it is suggested that SHC1 regulates**  
277 **metastasis by phosphorylating CTNNB1 (instead or in addition?) (Fig.3K, L). This**  
278 **conclusion should be rephrased.**

279 **Response:**

280 We thank the reviewer for this critical comment. We agree with the reviewer that more  
281 evidence could help to elucidate the mechanism of how SHC1 regulates cell migration  
282 through phosphorylation and leads to metastasis and poor prognosis in sarcoma. To  
283 systematically respond to the comments, we divided the comments into 2 parts:

284

285 **Part 1. The association between SHC1 and cell migration in the HC1 cluster.**

286 In our previous version, we grouped the 12 histological types of sarcomas into 6

287 hierarchical clusters (HC), among which HC1 containing both AS and ES showed the  
288 worst prognosis. Differential expression analysis combined with GO pathway analysis  
289 revealed HC1 featured with enrichment of the TGF $\beta$  signaling pathway. To further  
290 elucidate the mechanism underlying the poor prognosis of HC1 patients, we focused on  
291 the HC-elevated proteins that enriched in the TGF $\beta$  signaling pathway and identified  
292 SHC1 as the top-ranked elevated protein in HC1 associated with patients' poor  
293 prognosis. We then hypothetically assumed that SHC1 might play an important role in  
294 leading the poor prognosis of HC1 sarcoma, through enhancing TGF $\beta$  mediated tumor  
295 cell migration.

296

297 To confirm this assumption, in the revision, we conducted the following experiments:

298

### 299 **1.1. SHC1 could impact the HC1 tumor cell migration.**

300 To investigate the role of SHC1 in impacting the tumor cell migration in HC1 cluster,  
301 we utilized the ASM cell line (the cell line originating from AS), since AS is the main  
302 component of HC1. We constructed the stable SHC1-overexpressed ASM cell line  
303 (SHC1-OE-ASM) utilizing the pCDH-SHC1-copGFP vector and also knocked down  
304 *SHC1* (SHC1-KD-ASM) utilizing pLKO.1-CMV-shSHC1-copGFP. RT-PCR analysis  
305 was utilized to verify the expression of SHC1 in SHC1-OE-ASM and SHC1-KD-ASM.  
306 The results confirmed the significantly elevated expression of SHC1 in SHC1-OE-  
307 ASM and the significantly decreased expression of SHC1 in SHC1-KD-ASM (**Figure**  
308 **RL3A**). We then evaluated the cell migration rates using transwell assay. As a result,  
309 the SHC1-OE-ASM cell line showed increased cell migration ability, whereas the  
310 SHC1-KD-ASM cell line exhibited decreased cell migration ability compared with  
311 control cells (**Figure RL3B**).

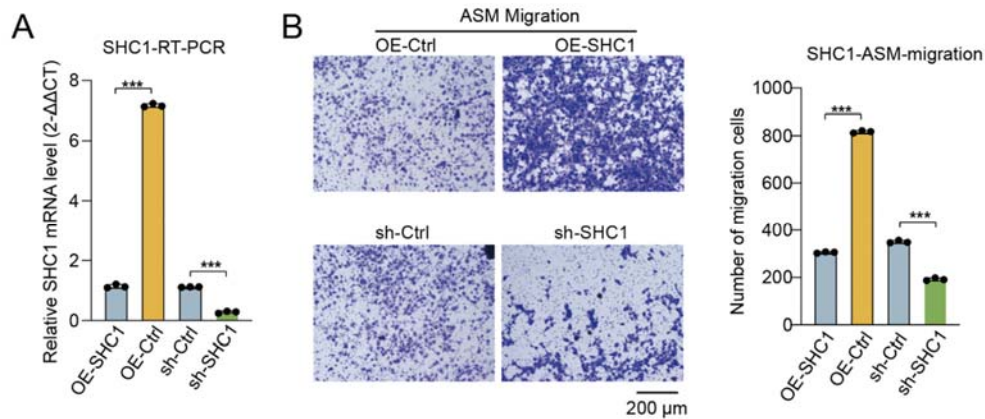

312 **Figure RL3. Functional experiments to validate the impacts of the SHC1-PTK2 and**  
 313 **SHC1-CSNK1G1 axis in sarcoma**

314 (A) The expression of SHC1 in SHC1-OE-ASM, SHC1-KD-ASM, and the control group by  
 315 RT-PCR. (B) The effects of SHC1 on the migration of ASM cells were confirmed by the  
 316 transwell assay. The bar plots (right panel) indicate counts of migrated ASM cells under  
 317 different treatments.

318  
 319 **1.2. Comparative analysis revealed PTK2 as the core kinase that linked SHC1 and**  
 320 **the phosphorylation of ADD2.**

321 Published researches have indicated that SHC1 participated in various biological  
 322 process, and might regulate downstream pathways through phosphorylation (*Nature*,  
 323 PMID: 23846654; *Nat Commun*, PMID: 28276425; *Front Cell Dev Biol*, PMID:  
 324 33693003). Therefore, in our previous version, to further illustrate how SHC1 led to  
 325 cell migration, we performed correlation analysis and observed that the  
 326 phosphorylation of ADD2 (functions in cytoskeleton reorganization and epithelial  
 327 migration) at Ser2 showed the most significant correlation with SHC1. Combined with  
 328 clinical information, we found that the phosphorylation of ADD2 at Ser2 was  
 329 significantly associated with patients' poor prognosis.

330  
 331 Functionally, SHC1 is an adapter protein that could interact with different kinases and  
 332 participate in signal transduction pathways (*Nature*, PMID: 23846654). In the revision,  
 333 to elucidate the kinase that related to SHC1 and might regulate the phosphorylation of  
 334 ADD2 at Ser2 in HC1 cluster, we referred to the public database (PhosphoSite [<https://>

335 [www.phosphosite.org/homeAction.action](http://www.phosphosite.org/homeAction.action)], Phos-pho.ELM [[http://](http://phospho.elm.eu.org/dataset.html)  
 336 [phospho.elm.eu.org/dataset.html](http://phospho.elm.eu.org/dataset.html)], and PhosphoPOINT [[http://](http://kinase.bioinformatics.tw/)  
 337 [kinase.bioinformatics.tw/](http://kinase.bioinformatics.tw/)] and conducted correlation analysis. As a result, among the  
 338 kinases reported to regulate phosphorylation of ADD2, PTK2, was identified as the  
 339 kinase that showed the most significant correlation with SHC1 and comparatively  
 340 higher expression in the HC1 cluster (**Figure RLC-D**).

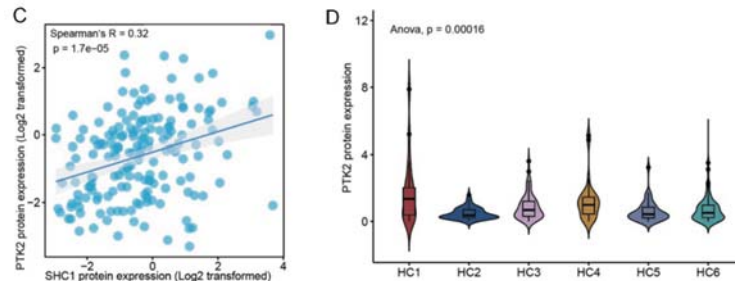

341 **Figure RL3.** (C) The scatter plot presenting the significantly positive correlation between the  
 342 protein expression of PTK2 and SHC1 (Spearman's rank correlation). (D) The violin plot  
 343 indicated the PTK2 protein expression among HC clusters.

### 345 1.3. Inhibiting PTK2 could impact the increased cell migration leading by SHC1.

346 To further investigate the role of PTK2 in impacting cell migration, we utilized SHC1-  
 347 OE-ASM and OE-Ctrl-ASM cells and treated them with PTK2 inhibitors. We then  
 348 evaluated the cell migration by transwell assay. As a result, inhibiting PTK2 could  
 349 significantly decrease the cell migration rates increased by SHC1 (**Figure RL3E**).  
 350 Moreover, overexpression of PTK2 in SHC1-KD-ASM significantly increased cell  
 351 migration which was inhibited by knocking down SHC1 (**Figure RL3F**). These results  
 352 implied that the kinase, PTK2 participated in cell migration driven by SHC1.

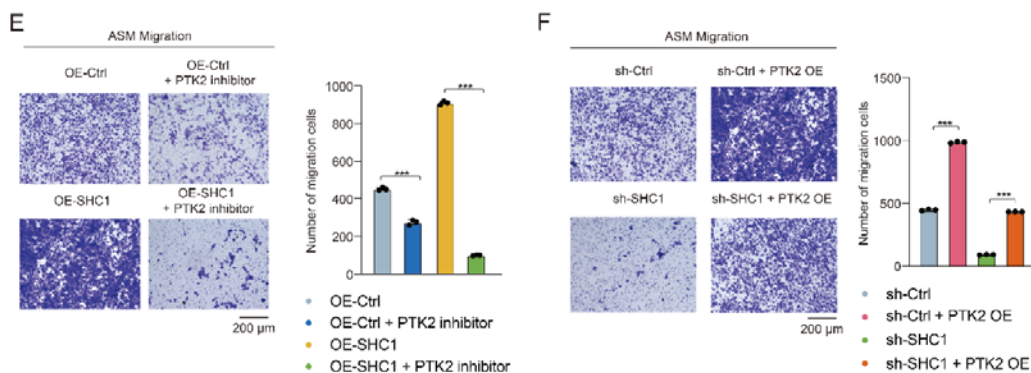

353 **Figure RL3.** (E-F) The transwell assay confirms effects of the SHC1-PTK2 axis on the



354 migration of ASM cells. The bar plots indicated the migrated cell counts of ASM cells under  
355 different treatments.

356

357 We further performed phosphoproteomic analysis between SHC1-OE-ASM treated  
358 with or without PTK2 inhibitor. As a result, the phosphorylation of some proteins  
359 participating in actin cytoskeleton reorganization and epithelial cell migration showed  
360 a significant elevation in SHC1-OE-ASM and a significant decrease in SHC1-OE-ASM  
361 treated with the PTK2 inhibitor, such as ADD2 at S2, FGD4 at S702, and EPB41 at  
362 S542 (**Figure RL3G**). These observations confirmed the role of PTK2 in  
363 phosphorylating ADD2 at S2 and elevation actin cytoskeleton reorganization pathways.

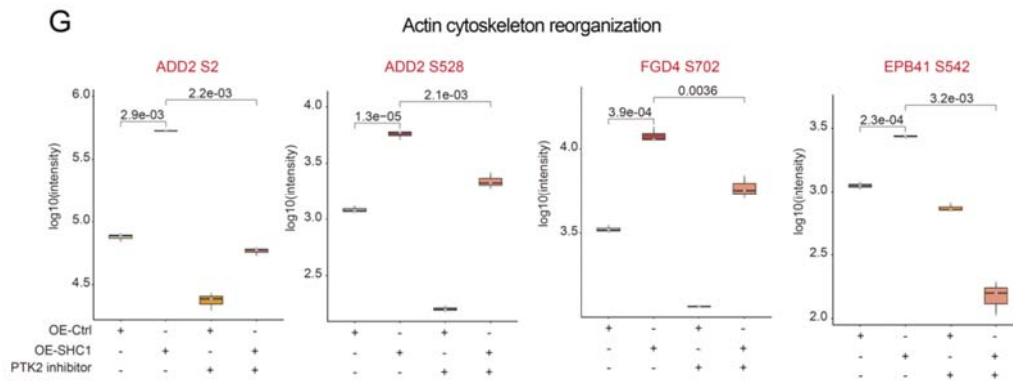

364 **Figure RL3.** (G) The boxplots indicate the phosphorylation intensity of ADD2 S2 and other  
365 phosphosites participating in actin cytoskeleton reorganization under different treatments.

366

367 In sum, the above experiments confirmed our assumption that SHC1 could impact the  
368 cell migration through phosphorylating ADD2 at Ser2, mediated by PTK2.

369

### 370 **Part2 The association between SHC1 expression and high metastatic rates of PC-** 371 **Ra-HC1.**

372 Additionally, in our previous manuscript, to investigate the heterogeneity within and  
373 across the histological subtypes of sarcomas, we performed proteomic-based subtyping  
374 and divided the sarcoma into three proteomic subtypes (PC-Ra, PC-Cc, and PC-Sm)  
375 with patients belonging to PC-Ra had the highest metastatic rates. Importantly, the  
376 integrative analysis of hierarchical and proteomic clusters revealed that PC-Ra  
377 contained samples from both HC1 (PC-Ra-HC1) and other HCs (PC-Ra-oHCs). We

378 then conducted further analysis and found that the elevated metastatic rates of PC-Ra-  
379 HC1 might be caused by SHC1-mediated angiogenesis (student's t-test: p-value =  
380 0.042), while PC-Ra-oHCs might be caused by MAPK10-mediated MAPK signaling  
381 pathway (student's t-test: p-value = 2.1e-4).

382

383 In previous version, to verify the impact of SHC1 for metastasis in PC-Ra-HC1, we  
384 have constructed SHC1-overexpressed vector and transfected it into the ISOHAS cell  
385 line (SHC1-OE-ISOHAS) which showed similar expression patterns with PC-Ra-HC1,  
386 and conducted the transwell migration assay. As a result, the increased migration ability  
387 of SHC1-OE-ISOHAS was observed, confirming the role of SHC1 in enhancing  
388 metastasis of tumors belonging to PC-Ra-HC1 (shown in the original **Figure 3I**).

389

390 In the revision, we then tried to further illustrate the mechanism underlining this  
391 phenomenon. Since we have confirmed that as an adaptor protein, SHC1 could interact  
392 with PTK2 and phosphorylated ADD2 to elevate the actin cytoskeleton reorganization  
393 pathway in HC1, we then evaluated the expression of PTK2 and phosphorylation of  
394 ADD2 in HC1-PC-Ra. As a result, comparing to HC1-oPCs (HC1 samples which were  
395 grouped into other proteomic clusters), PTK2 and phosphorylation of ADD2 at S2  
396 showed no significantly elevation in HC1-PC-Ra (**Figure RL3H**), implying that PTK2  
397 phosphorylated ADD at S2 might be the common features shared by both HC1-PC-Ra  
398 and HC1-oPCs, and SHC1 might cooperate with other kinases to promote metastasis of  
399 HC1-PC-Ra.

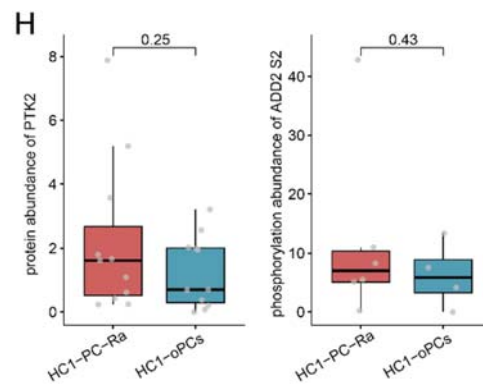

400 **Figure RL3.** (H) Boxplots illustrate the abundances of PTK2 and ADD2 S2 in HC1-PC-Ra  
401 and HC1-oPCs

402 We then explored the potential phosphosites that might be regulated by SHC1 and lead  
 403 to metastasis in PC-Ra-HC1. As a result, the phosphosite CTNNB1 at Ser552 was  
 404 identified to be the potential regulatory phosphosites of SHC1. Further validation  
 405 experiments were conducted and verified that elevated expression of SHC1 could  
 406 elevate the phosphorylation of CTNNB1 at Ser552 (**Figure RL3I**).

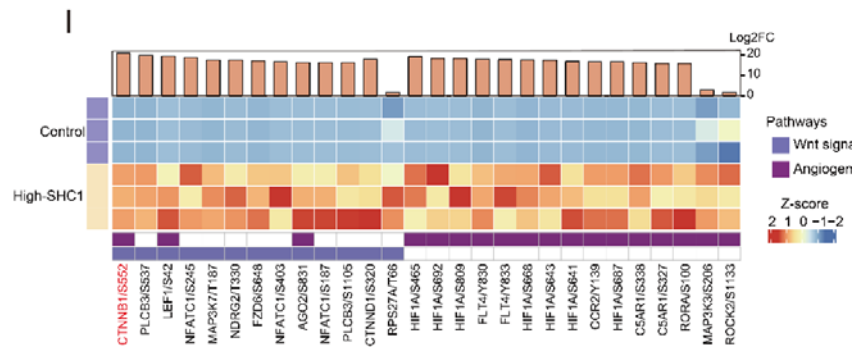

407 **Figure RL3. (I)** Heatmap illustrating elevated phosphosites in high-SHC1 patient derived  
 408 cells.

409

410 In the revision, to further explore the kinase that associated with SHC1, the  
 411 phosphorylation of CTNNB1 at Ser552 and the tumor metastasis. The following  
 412 experiments were performed:

413

414 **2.1 Comparative and correlation analysis revealed CSNK1G1 as the core kinase**  
 415 **that linked SHC1 and the phosphorylation of CTNNB1.**

416 We referred to the public database and performed further correlation analysis. As a  
 417 result, among the public reported kinases of CTNNB1, CSNK1G1 showed the  
 418 significantly positive correlation with both SHC1 and the phosphorylation of CTNNB1  
 419 at Ser552 (**Figure RL3J-K**). Consistently, the phosphorylation of CSNK1G1 also  
 420 showed elevated expression level in PC-Ra (**Figure RL3L**).

421

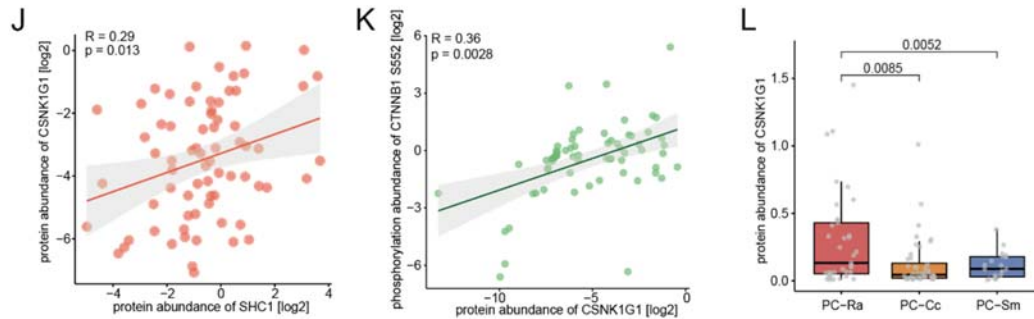

422 **Figure RL3.** (J) The correlation of the expression of CSNK1G1 with SHC1 expression  
 423 (Spearman' s rank correlation). (K) The correlation of the expression of CSNK1G1 with the  
 424 phosphorylation of CTNNB1 at Ser552 (Spearman' s rank correlation). (L) The boxplot  
 425 indicates the expression of CSNK1G1 in different proteomic clusters.

426

427 **2.2. Inhibiting CSNK1G1 could impact the increased cell migration leading by**  
 428 **SHC1.**

429 To further investigate the role of CSNK1G1 in impacting tumor metastasis, we utilized  
 430 the constructed SHC1-OE-ISOHAS and Ctrl-OE-ISOHAS cells and treated them with  
 431 the CSNK1G1 inhibitor. We then evaluated the cell migration by transwell assay. As a  
 432 result, inhibiting CSNK1G1 could significantly decrease the cell migration rates  
 433 increased by SHC1 (**Figure RL3M**). These results implied that CSNK1G1 as a kinase  
 434 participated in tumor metastasis in PC-Ra-HC1 driven by SHC1.

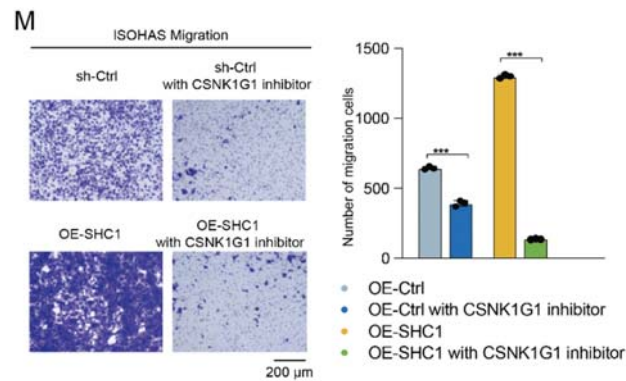

435 **Figure RL3.** (M) The effects of the SHC1-CSNK1G1 axis on the migration of ISOHAS cells  
 436 were confirmed by transwell assay. The bar plots indicated the migrated cell counts of ISOHAS  
 437 cells under different treatments.

438

439 We further performed phosphoproteomic analysis between SHC1-OE-ISOHAS treated  
 440 with or without the CSNK1G1 inhibitor. As a result, the phosphosites of proteins  
 441 participating in angiogenesis, especially CTNNB1 Ser552, significantly decreased in  
 442 SHC1-OE-ISOHAS treated with the CSNK1G1 inhibitor (**Figure RL3N**). These  
 443 observations confirmed the role of CSNK1G1 in phosphorylating CTNNB1 at Ser552.

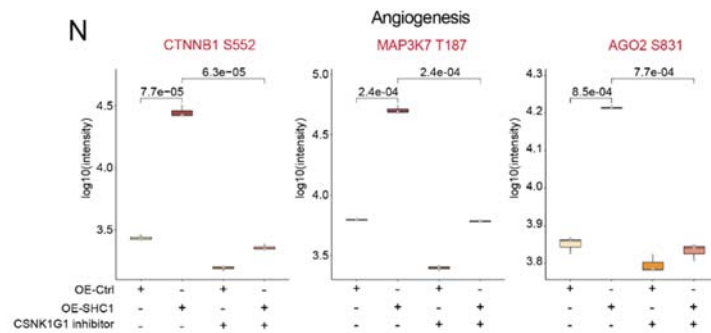

444 **Figure RL3.** (N) The boxplots indicate the phosphorylation levels of CTNNB1 Ser552 and  
 445 other phosphosites participating in angiogenesis under different treatments.

446

447 The above results confirmed our assumption that SHC1 could lead to PC-Ra-HC1  
 448 tumor migration through phosphorylating CTNNB1 mediated by CSNK1G1.

449

450

451 In sum, our data illustrated the two potential functions of SHC1, by interacting with  
 452 PTK2 and phosphorylating ADD2 at Ser2, SHC1 will enhance cell migration, and lead  
 453 to poor prognosis of HC1 patients. Meanwhile, for a group of HC1 patients that showed  
 454 proteomic features of Pc-Ra, SHC1 will further interact with CSNK1G1 and  
 455 phosphorylating CTNNB1 at Ser552, and lead to tumor metastasis (**Figure RL3O**).

456

457 According to the reviewer’s comments, we also toned down our statements as follows:

458 “In sum, the upregulation of SHC1 might interact with kinase PTK2, phosphorylating  
 459 ADD2 at Ser2, enhanced cell migration. This phosphorylation cascade might be  
 460 associated with the poor prognosis with HC1 patients (AS or ES).”

461

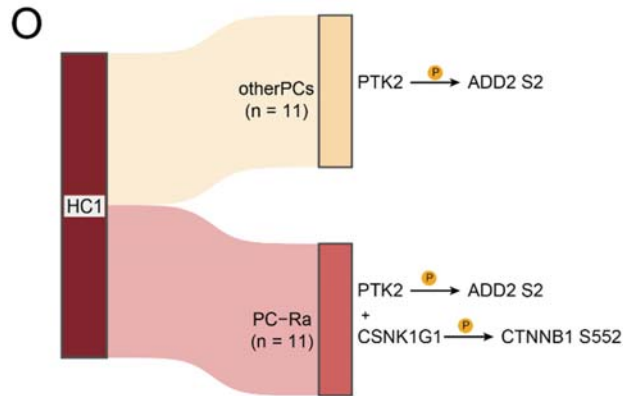

462 **Figure RL3.** (O) Sankey plot illustrates the distribution of HC1 in proteomic clusters and  
 463 related phosphorylation process.

464

465 In the revision, we have updated **Figure RL3** in the revised **Supplementary Figure**  
 466 **10&11** and the “**Result**” section on lines297-334, line355-384, line 397-417, and line  
 467 520-551. in the revised manuscript.

468

469 **Line 458: “Taken together, our data illustrated that RIOK1 phosphorylates NPM1**  
 470 **on Ser125 to assist the interaction of NPM1 and APEX1 resulting in cell**  
 471 **proliferation in PC-Cc”. Again, the authors show increase proliferation by NPM1**  
 472 **overexpression, and that NPM1 interacts with APEX1 but the rest of the data is**  
 473 **correlative.**

474 **Response:**

475 We appreciate the reviewer for this critical suggestion, and we agree with the reviewer  
 476 that more evidence should be provided before making conclusion. According to  
 477 reviewer’s suggestion, in the revision, we performed further analysis and functional  
 478 experiments to confirm our findings.

479

480 Specifically, we utilized the sarcoma cell line, RKN, for further functional experiments,  
 481 as it originates from LMS and represents the proteomic features of PC-Cc. We  
 482 constructed the RIOK1-overexpressed RKN cell line (RIOK1-OE-RKN) through the  
 483 RIOK1 overexpression plasmid, pCDH-RIOK1-copGFP. Moreover, shRNA of RIOK1  
 484 were designed and transfected into RKN cell line to knock down the expression of  
 485 RIOK1 (RIOK1-KD-RKN). We then performed CCK8 cell proliferation assay and

486 evaluated the cell proliferation rates. As a result, RIOK1-OE-RKN showed most  
 487 significantly elevated cell proliferation rates and RIOK1-KD-RKN had significantly  
 488 decreased cell proliferation rates (**Figure RL4A**). We also treated RIOK1-OE-RKN  
 489 cell line with RIOK1 inhibitor, and the inhibitor significantly decreased the  
 490 proliferation of RIOK1-OE-RKN (**Figure RL4A**). These observations confirmed the  
 491 impact of RIOK1 on promoting sarcoma tumor cell proliferation. We then performed  
 492 comparative proteomic and phosphoproteomic analysis among RKN sarcoma cell lines  
 493 with different treatments (RKN transfected with empty vector, RIOK1-OE-RKN,  
 494 RIOK1-OE-RKN treated with RIOK1 inhibitor, RKN transfected with scrambled  
 495 shRNA, RIOK1-KD-RKN). As a result, besides APEX1, the proteins participating in  
 496 DNA base excision repair including XRCC1, XRCC4, POLB, as well as cell  
 497 proliferation index KI67 showed elevated expression in RIOK1-OE-RKN (**Figure**  
 498 **RL4B-C**). Intriguingly, the phosphorylation of NPM1 at Ser 125 was significantly  
 499 increased in RIOK1-OE-RKN, implying that RIOK1 regulated the phosphorylation of  
 500 NPM1 (**Figure RL4C**).

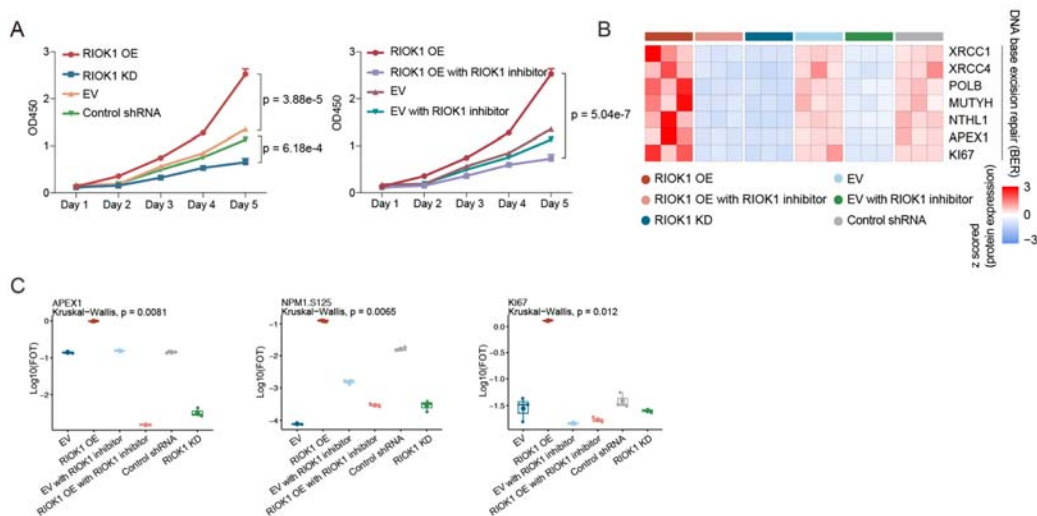

501 **Figure RL4. Functional experiments to validate the impact of RIOK1 and the interaction**  
 502 **between NPM1 and APEX1.**

503 (A) Proliferation of the RKN cell line associated with different treatments (n = 4 repeats per  
 504 group). (B) The heatmap reveals the expression patterns of DNA base excision proteins across  
 505 the cells associated with various treatment (n = 3 repeats per group). (C) The boxplots reveal  
 506 the abundance of APEX1, KI67 and phosphorylation of NPM1 at Ser125 in RKN cell line with

507 different treatments.

508

509 To further investigate the impact of NPM1 phosphorylation on cell proliferation as well  
510 as on its interaction with APEX1, we then constructed NPM1 phosphorylation site  
511 mutant plasmid, NPM1<sup>S125A</sup>, and transfected it into RIOK1-KD-RKN cells (NPM1-  
512 mut-OE-RIOK1-KD-RKN). The non-mutant NPM1 was also transfected into RIOK1-  
513 KD-RKN cells (NPM1-OE-RIOK1-KD-RKN) which were utilized as controls. By  
514 evaluating the cell proliferation rates, we observed that comparing to RIOK1-KD-RKN  
515 cells, NPM1-OE-RIOK1-KD-RKN cells showed elevated cell proliferation rates,  
516 whereas the cell proliferation rates of NPM1-mut-OE-RIOK1-KD-RKN showed no  
517 significant elevation (**Figure RL4D**). Consistently, the cell proliferation index, KI67  
518 was also observed to be elevated only in NPM1-OE-RIOK1-KD-RKN cells (**Figure**  
519 **RL4E**). Meanwhile, comparative proteomics and phosphoproteomic data confirmed  
520 the increased expression of APEX1 as well as the increased phosphorylation of NPM1  
521 at Ser125 in NPM1-OE-RIOK1-KD-RKN cells (**Figure RL4E**).

522

523 These results indicated the decreased cell proliferation rates led by knocking down  
524 RIOK1 could only be rescued by the wild type NPM1 overexpression, which further  
525 emphasized the role of phosphorylation of NPM1 in mediating RIOK-dependent  
526 regulation of the tumor cell proliferation.

527



528 To further illustrate whether the phosphorylation of NPM1 affected its interaction with  
 529 APEX1, we performed IP-MS using both NPM1-mut-OE-RIOK1-KD-RKN and  
 530 NPM1-OE-RIOK1-KD-RKN (**Figure RL4F**). As a result, 17 proteins were identified  
 531 to interact with the wild type NPM1, but not NPM1<sup>S125A</sup>. Among them, APEX1  
 532 presented the highest abundance, proving that NPM1 Ser125 is the pivotal site for the  
 533 interaction between NPM1 and APEX1 (**Figure RL4G-H**). The above results  
 534 illustrated the potential mechanism that RIOK1 could impact sarcoma tumor cell  
 535 proliferation through phosphorylating NPM1 which then interacted with APEX1 and  
 536 promoted tumor cell proliferation accordingly.

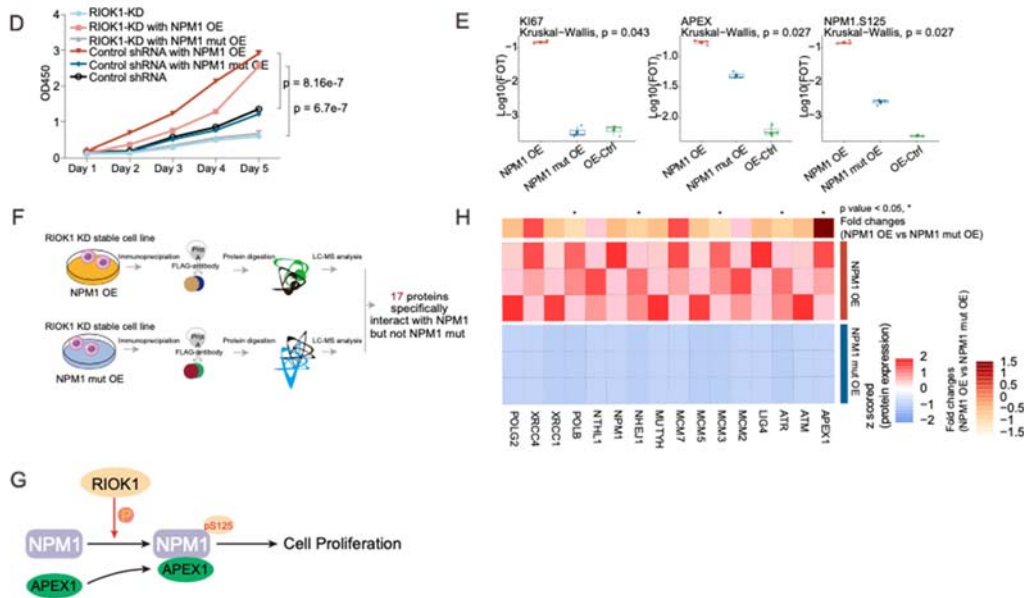

537 **Figure RL4.** (D) Proliferation of the RNK cell line associated with various treatments (n = 4).  
 538 (E) The boxplots presenting the expression of KI67, APEX1 and phosphorylation of NPM1  
 539 among NPM1-OE-RIOK1-KD-RKN, NPM1-mut-OE-RIOK1-KD-RKN and EV-RIOK1-KD-  
 540 RKN. (F) The schematic work flow of the IP-MS experiment for the NPM1. (G) The heatmap  
 541 reveals the expression patterns of DNA base excision proteins across the NPM1-OE-RIOK1-  
 542 KD-RKN, NPM1-mut-OE-RIOK1-KD-RKN (n = 3 repeats per group). (H) Diagram illustrated  
 543 RIOK1 activates NPM1 through Ser125 and then NPM1 interacts with APEX1 to promote cell  
 544 proliferation.

545

546 We updated the **Figure RL4** in the revised **Figure 4** and **Supplementary Figure 12**  
 547 and added the words in the revised manuscript on lines 631-669. Meanwhile, following

548 reviewer's suggestion, we also toned down our statements as following "Taken together,  
549 our data illustrated the potential mechanism underline how the axis of RIOK1-phos-  
550 NPM1-APEX1 might promote tumor cell proliferations."

551

552 **5. The TME deconvolution analysis suggests some interesting relationships. Since**  
553 **this type of analysis is usually done from transcriptomic data, I wonder to what**  
554 **extent is well established for proteome analysis. Was this validated with an**  
555 **alternative deconvolution method or by a couple of IHC markers to validate**  
556 **enrichment of immune cell populations in some of the samples analyzed?**

557 **Response:**

558 Thanks for the reviser's suggestion. In the previous version, to evaluate the tumor  
559 microenvironment of sarcoma, we inferred cellular compositions in the  
560 microenvironments of sarcomas utilizing xCell deconvolution algorithm (*Genome Biol*,  
561 PMID: 29141660) based on proteomic data. We utilized inferred cell deconvolution  
562 data to classify the sarcomas into 3 immune subgroups with distinctive immune features.

563

564 In agreement with the reviewer, we acknowledged that the cell deconvolution analyses  
565 were usually based on transcriptomic data. Meanwhile, previous researches have  
566 revealed tumor microenvironment infiltration estimated by proteomic data had a high  
567 Pearson's correlation with ones estimated by transcriptomic data (*Cell*, PMID:  
568 31675502; *Cell*, PMID: 32649874; *J Hematol Oncol*, PMID: 35659036; *Nat. Commun*,  
569 PMID: 36720864). Moreover, published research has indicated the potential of using  
570 proteomic data for xCell analysis could illustrate the tumor microenvironment  
571 infiltration. For example, in the multilevel proteomic research of diffuse-type and  
572 intestinal-type gastric cancer (*Nat Commun*, PMID: 36788224), the immune clustering  
573 of xCell-deconvoluted tumor microenvironment components based on proteomic data  
574 revealed that Th1/Th2 ratio could serve as an indicator for immunotherapeutic  
575 effectiveness, which was validated in an independent GC anti-PD1 therapeutic patient  
576 group. In addition, a proteogenomic search of cholangiocarcinoma (*Hepatology*, PMID:  
577 35716043) revealed that a higher level of xCell-derived CD4+ T cells based on  
578 proteomic data was associated with the favorable prognosis, which was further

579 confirmed in a combined cohort. These researches showed the findings uncovered by  
580 xCell based on proteomic data could be further validated by other independent  
581 experiments, indicating the importance of proteomic data in the tumor  
582 microenvironment.

583

584 In the revision, to further confirm the immune features inferred by proteomic data based  
585 xCell analysis, we conducted the following analysis and experiments: (1) we utilized  
586 the other two cell deconvolution analysis tools (CIBERSORT and ESTIMATE  
587 algorithms) to infer the immune features of the sarcoma tumor microenvironments; (2)  
588 we investigated the expression patterns of cell-type specific proteins to confirm the  
589 distinctive cell type distribution among different immune subtypes of sarcomas; (3) We  
590 also utilized IHC staining to verify the distinctive cell type distribution among different  
591 immune subtypes of sarcomas.

592

593 **1. Tumor microenvironment deconvolution analysis using CIBERSORT and**  
594 **ESTIMATE algorithms, confirmed distinctive immune features inferred by the**  
595 **xCell algorithm.**

596 To confirm our cellular composition analysis by xCell algorithms, we utilized  
597 ESTIMATE and CIBERSORT methods to infer each patient's total immune cell  
598 infiltration scores and distinctive cell type enrichment scores. We then compared both  
599 total immune scores and cell-type specific enrichment scores among the three immune  
600 subtypes (clustering based on cellular deconvolution scores of the xCell algorithm).  
601 The results confirmed the consistent conclusion inferred by the three deconvolution  
602 methods. As for the total immune and stroma scores, both CIBERSORT and  
603 ESTIMATE confirmed the conclusion inferred by xCell algorithms. Particularly, the  
604 immune subtype that harbored the highest immune infiltration score was IM-S-3, and  
605 the immune subtype that held the highest stromal scores was IM-S-1. Meanwhile, as  
606 for cell-type specific enrichment scores among the three immune subtypes, in  
607 concordant with the distinctive cell-type enrichments revealed by xCell analysis,  
608 CIBERSORT also indicated that the IM-S-3 showed the highest enrichment scores of  
609 CD8<sup>+</sup> T cell, M1 macrophage and M2 macrophage, and IM-S-2 showed the highest

610 memory B cell enrichment scores (Figure RL5A-B). These results confirmed the  
 611 feasibility of our proteomic-based xCell deconvolution analysis in predicting the  
 612 distinctive cell type enrichment in sarcoma tumor microenvironments.  
 613

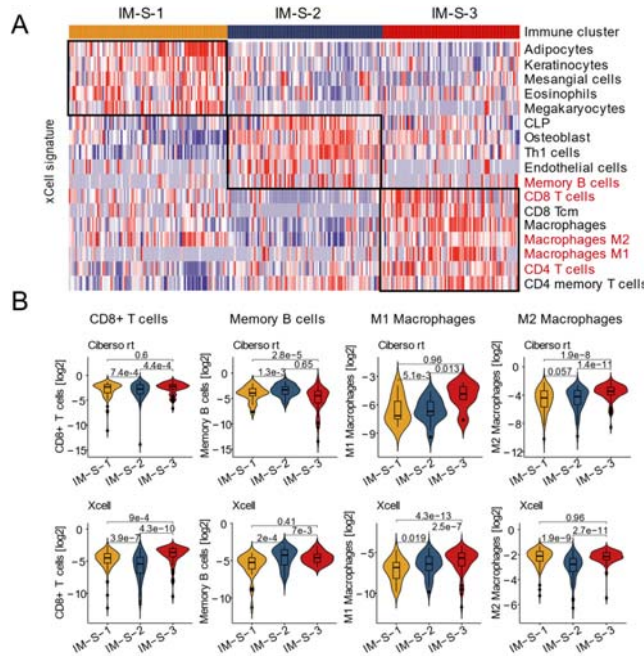

614  
 615 **Figure RL5. The immune cell signatures and cell markers in different immune clusters**  
 616 (A) The heatmap illustrates the immune and stromal cell types enriched in different immune  
 617 clusters; (B) Boxplots illustrate cell signature scores inferred by xCell and CIBERSORT  
 618 algorithm among three immune clusters.  
 619

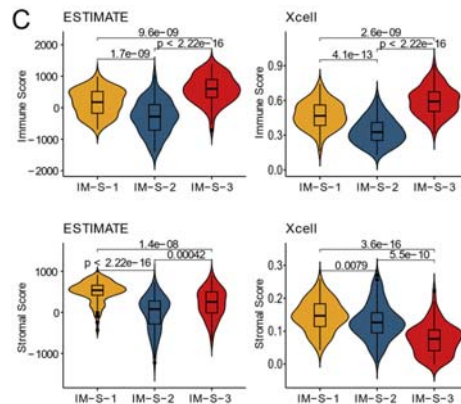

620 **Figure RL5 (C)** Boxplots illustrate the immune scores and stromal scores calculated by xCell  
 621 and ESTIMATE algorithm among the three immune clusters.  
 622

623 **2. The expression patterns of cell types specific markers confirmed the distinctive**  
624 **cell type distribution among immune subtypes of sarcomas.**

625 To confirm the distinctive tumor microenvironment inferred by cell deconvolution  
626 analysis, we focused on the significantly enriched cell types of each immune subtype  
627 and evaluated the mass-spectrum-based abundance of their distinctive markers among  
628 three immune clusters. As a result, for IM-S-1 that enriched with Keratinocyte, we  
629 evaluated the protein expression of Keratinocyte markers, and observed dominant  
630 expression of CD34, KRT14, KRT9 and KRT5 in IM-S-1. Meanwhile, for IM-S-2 that  
631 enriched with endothelial cells, we evaluated the expression of endothelial cell  
632 markers and detected MCAM showed significantly elevated expression in IM-S-2.  
633 Moreover, for IM-S-3 that enriched with CD4<sup>+</sup> T cells and macrophages, we  
634 investigated the expression of CD4<sup>+</sup> T cell markers and macrophage markers, and found  
635 the protein expression of CD4<sup>+</sup> T cell markers (CD4, CD38, and ISG20) and  
636 macrophage markers (CD14, CD163, CSF1R, and FCGR1A) presented significantly  
637 higher levels in IM-S-3 (Figure RL5A, 5D). These results also verified our proteomic-  
638 based xCell deconvolution analysis.

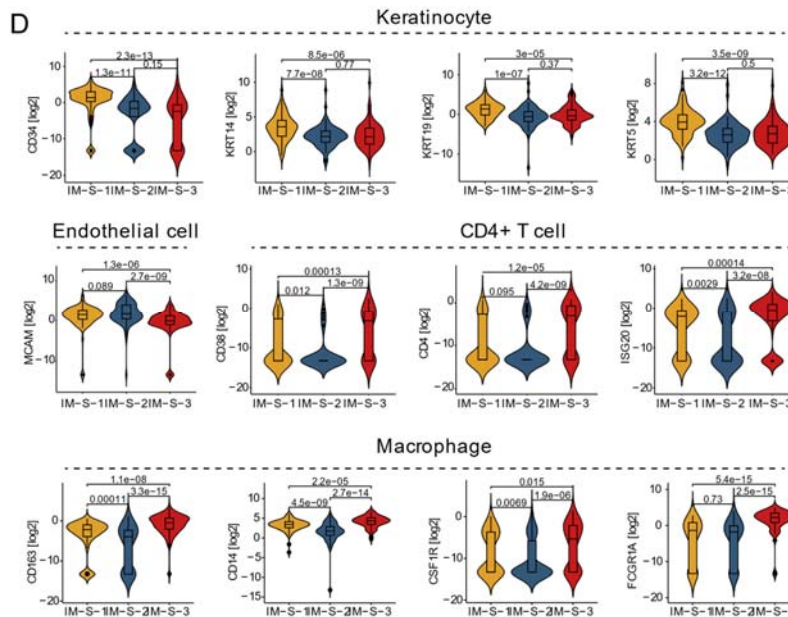

639 **Figure RL5 (D)** Boxplots illustrate proteomic abundance of immune cell markers in immune  
640 clusters.  
641  
642

643 **3. IHC staining verified the distinctive cell type distribution among different**

644 **immune subtypes of sarcomas**

645 To further verify our TME deconvolution analysis, we randomly selected several  
646 markers for distinctive cell types of each immune subtype (KRT5 & KRT9 for  
647 Keratinocyte, CD4 & ISG20 for CD4<sup>+</sup> T cells, CD19 & IgM for B cells) and obtained  
648 their expressions through IHC staining (**Figure RL5E**). These markers showed  
649 consistent enrichment in immune clusters with related xCell-enriched cell types  
650 (**Figure RL5A, 5E**). For example, CD4<sup>+</sup> T cells had the highest infiltrated scores in the  
651 IM-S-3 group. Consistently, the IHC results also presented the highest CD4 and ISG20  
652 expressions in the IM-S-3 group. Meanwhile, IHC staining using CD19 and IgM  
653 confirmed the elevated expressions of these two B cell markers in the IM-S-2. Moreover,  
654 IHC staining using KRT5 and KRT9 verified the dominant expression of these  
655 keratinocytes in IM-S-1. In sum, these IHC staining provided a convincing proof for

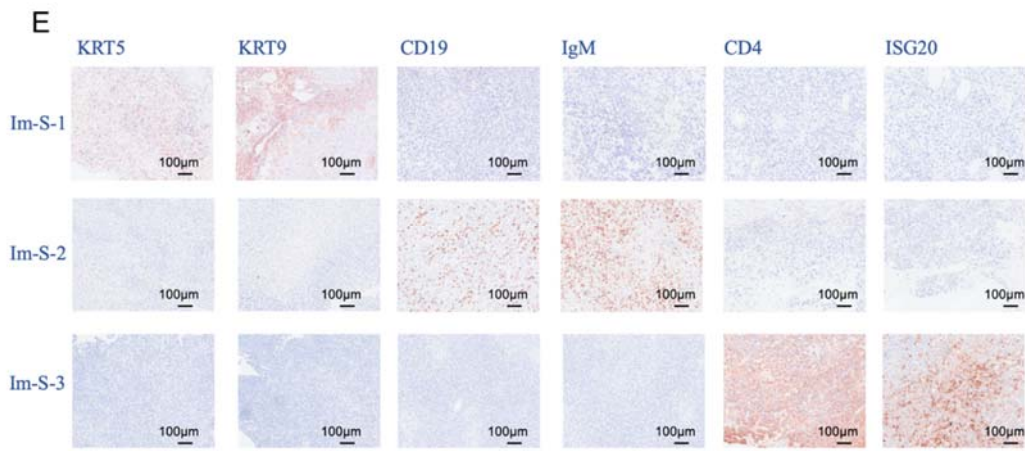

656 our TME convolution result.

657 **Figure RL5 (E)** IHC staining presenting expressions of immune and stromal cell markers in  
658 three immune clusters.

659

660 In sum, both ESTIMATE and CIBERSORT algorithm confirmed xCell inferred cell  
661 types distributions among the three immune subtypes. Further cell marker expression  
662 analysis and IHC staining also revealed the consistence of the tumor microenvironment  
663 features of the three distinctive immune clusters. In the revision, we have updated  
664 **Figure RL5** in **Supplementary Figure 14**, we updated these above analyses in lines  
665 710–722 of the “**Results**” section of the revised manuscript.

666

667 **6. The discussion is too long and has some paragraphs that are not well written.**

668 **See for example the paragraph starting on line 647.**

669 **Response:**

670 We thank the reviewer for this constructive suggestion and sincerely apologize for the  
671 unclear description of the discussion section. The main points that we want to present  
672 in the discussion section are summarized as follows:

673 (1) Summarizing the hypothesis and purpose of the study.

674 (2) Comparing and contrasting to previous studies of our main findings such as the  
675 common and specific features of different histological subtypes of sarcomas.

676 (3) Discussing the potential therapeutical options of the sarcomas.

677

678 According to the reviewer's suggestion, we thoroughly revised the discussion section,  
679 and concisely wrote the essential interpretation and main pieces of supporting evidence,  
680 which have been described in the result section. We further added limitations of the  
681 study, as well as potential future research. The revised discussions were presented as  
682 follows:

683

684 **Discussion**

685 In this study, we establish a Chinese pan-sarcoma cohort including 272 patients and 12  
686 usual or unusual sarcoma histologic subtypes. We performed integrate proteomic and  
687 phosphoproteomic data to reveal the differentially overrepresented signaling pathways  
688 in STS histologic subtypes, metastasis-related proteins, and therapeutically relevant  
689 subgroups. Our study with this cohort would serve as a complement to the previous  
690 genome and transcriptome studies and exhibit a range of clinic-histologic spectrums of  
691 pan-sarcoma.

692

693 The heterogeneity and variability of sarcoma histological subtypes make it difficult to  
694 understand the features of histological subtypes and guide clinical management.  
695 Employing the hierarchical clustering, we could reveal the intrinsic common features  
696 of different histological subtypes of sarcoma and define subgroups across histological

697 subtypes from the proteomic viewpoint. Although, at histological level, WDLPS,  
698 MLPS, and DDLPS all belong to the category of liposarcoma, our proteomic-based  
699 hierarchical clustering revealed the DDPLS showed the similar proteomic features with  
700 MFS than with MLPS and WDLPS. Specifically, the cell proliferation scores were  
701 significantly elevated in both MFS and DDLPS. These findings confirmed the previous  
702 transcriptomic research that indicated the DDLPS showed comparatively elevated cell  
703 proliferation features at mRNA level<sup>1</sup>. Importantly, by performing comparative analysis,  
704 we found the RAB signaling pathway was dominantly enriched in DDLPS, and further  
705 illustrated that RAB2A might led to tumor cell proliferation of DDLPS by increasing  
706 autophagy process. These results implicated that inhibiting autophagy might be a  
707 promising therapeutical option for patients with DDLPS.

708

709 MFS was once considered a subset of UPS (“myxoid malignant fibrous histiocytoma”),  
710 but they have been classified as distinct clinical entities based on their different  
711 clinicopathologic features<sup>2</sup>. Despite the clinical classification, the molecular diversity  
712 of these two subtypes have not been uncovered, thus for now, the treating strategies for  
713 UPS and MFS remain the same. Our research revealed that MFS showed enriched  
714 transport-related pathways, whereas UPS showed enriched RNA process and  
715 metabolism pathways. The diverse proteomic features of UPS and MFS implied the two  
716 different histological sarcoma subtypes could be benefited from distinctive  
717 therapeutical approaches in the feature.

718

719 AS represents a rare group of soft-tissue sarcomas and are aggressive endothelial cell  
720 tumors of vascular or lymphatic origin<sup>3,4</sup>. Angiogenesis is thought to be associated with  
721 the pathogenesis of AS and is regarded as a potential target for treatment. However,  
722 some clinical trials of anti-angiogenesis drugs in AS don’t have positive results or only  
723 showed limited improved DFS, including bevacizumab (VEGF-A antibody), trebananib  
724 (an angiopoietin-1 and -2 peptibody), and sorafenib (VEGFR and B-Raf inhibitor)<sup>5,6</sup>.  
725 By performing integrative analysis and functional experiments, our study identified  
726 SHC1 as the key regulator, which could elevate actin cytoskeleton reorganization and



727 led to unfavorable outcomes of AS patients. These results implied that SHC1 might  
728 serve as a promising therapy target for AS patients.

729

730 The diverse immune features have been reported to be associated with the prognosis of  
731 sarcoma patients, but the majority of these researches were either down in animal  
732 models or have one layer of omics data. For instance, Magrini and colleagues have  
733 utilized transcriptomic data from sarcoma mice model to illustrate that the sarcoma  
734 tumor cells could express C3 which could then recruit macrophages through C3-C3aR  
735 axis, thus C3 deficiency-associated signatures of macrophages could lead to favorable  
736 prognosis in sarcoma<sup>7</sup>. Since we have also observed elevated C3 protein expression in  
737 tumor tissues, we then investigated the potential association among C3 protein  
738 expression, the recruitment of macrophages and patients' prognosis. As a result, the  
739 significant positive correlation between C3 and macrophage enrichment was observed  
740 in our pan-sarcoma dataset. Further integrative analysis with patients' prognosis revealed  
741 that the C3-deficiency macrophage signature based on proteomic was associated with patients'  
742 prognosis, consistent with the result gotten from transcriptome previously. Meanwhile,  
743 previous research conducted by Petitprez et al. have utilized transcriptomic data based  
744 immune analysis to decipher the immune diversity in pan-sarcomas<sup>8</sup>. They have proved  
745 the enrichment of B cells led to favorable out comes in several sarcoma histological  
746 subtypes (LMS, AS, UPS and MFS). We then evaluated the prognostic relevance of B  
747 cell enrichment, as a result, the similar clinical relevance of B cells was also observed  
748 in the four histological subtypes in our cohort, implied the concordance in evaluating  
749 immune features either by transcriptomic or by proteomic data. Moreover, to further  
750 elevate the clinical applicable of utilizing B cells to prognostic index, we further  
751 evaluated the prognostic relevance of the B cell markers' protein expression in our  
752 sarcoma cohort and published TCGA cohort. As a result, among the 12 B cell markers  
753 that have been detected in our dataset, 7 B cell markers showed significant association  
754 with patients' prognosis in our pan-sarcoma cohort. 3 of these B cell markers (PTPRC,  
755 CD9, IGLL5) showed consistent prognostic relevance at transcriptomic level in TCGA  
756 cohort (*Cell*, PMID: 29100075). These results implying the potential clinical utilization  
757 of these 3 B cell markers for prognostic prediction in feature.

758

759 Immune therapy has been applied to many malignancies and presents improved  
760 clinical outcomes, such as melanoma. Some clinical studies for immune therapy in STS  
761 have been completed and obtained positive results for advanced, metastatic, or  
762 unresectable STS<sup>9, 10</sup>. Despite the progression of immune therapy in STS, the  
763 heterogeneity of TME components within STS histologic subtypes makes it a challenge  
764 to distinguish patients responding to immune therapy. Intriguingly, based on TME  
765 components, we defined a subtype of STS (IM-S-3) with enriched immune infiltration  
766 and immune evasion markers (CD274 and CD80) which might respond to immune  
767 therapy, especially PD-L1 inhibitors. Besides the heterogeneity in STS histologic  
768 subtypes, the interaction between tumor biologic process and TME in STS is quite  
769 important for the potential combination therapies for sarcoma<sup>11</sup>. Our results implied  
770 that the CTNNB1 may contribute to the transcription of CD274 in the immune-enriched  
771 group of STS. Meanwhile, MAPK10 participates in this process by phosphorylation of  
772 CTNNB1 Ser675. Based on our research, we provide a viewpoint that combined  
773 blockade of MAPK10 and CD274 might be an effective strategy for STS. Meanwhile,  
774 combined blockade of CTNNB1 and CD274 could possibly achieve the same effect.  
775 These conclusions still require further research.

776

777 The aims of this study were to provide a proteomic and phosphoproteomic landscape  
778 to decipher the sarcomas' heterogeneity, the prognosis-related markers, and abnormally  
779 changed biology pathways. There are some limitations due to the sample collection and  
780 technology as follows:

781 1. The sarcoma cohort in this study is single-centered from Fudan University,  
782 Zhongshan Hospital and included only Chinese patients, so the conclusions may lead  
783 to potential selection bias. Additional prospective studies are needed to validate our  
784 findings in multi-center and cohort of other ethnicities.

785 2. We found specific subtype-enriched proteins which might be serviceable in early  
786 diagnosis and histological subtype detection, but we couldn't exclude the possibility  
787 that this protein could have stemmed from other affected organs or may be indirectly  
788 induced by the effects of the tumors on their microenvironment or even systemically.

789 Further experiments or clinical data are necessary complement to validate the roles of  
790 this proteins in sarcoma.

791 3. The proteomic data in this study was generated through bulk proteomic approach  
792 from tumor and NAT tissues and couldn't fully reflect the heterogenous tumor regions  
793 and the tumor-NAT boundary regions. Integrating single cell and spatial omics would  
794 be useful to further explore the intra-tumoral heterogeneity in the future research.

795 4. The samples in this study were all collected from treat-naïve patients and were all  
796 primary tumors without remote metastasis or local relapse. The information about  
797 metastasis and local relapse come from 60-month follow up. The conclusion in this  
798 study that SHC1 and MAPK10 promotes metastasis required further confirmatory  
799 studies on metastatic samples. Other conclusions were also just based on localized  
800 diseases, it will have to be determined if these conclusions are also tenable in locally  
801 relapsed and metastatic tumors.

802

803 Please see the details in the '**Discussion**' section of revised manuscript labeled in red  
804 text.

805

## 806 **Reference**

807 1. Hirata, M. *et al.* Integrated exome and RNA sequencing of dedifferentiated  
808 liposarcoma. *Nat Commun* **10**, 5683 (2019).

809 2. Doyle, L. A. Sarcoma classification: an update based on the 2013 World Health  
810 Organization Classification of Tumors of Soft Tissue and Bone. *Cancer* **120**, 1763–  
811 1774 (2014).

812 3. Fayette, J. *et al.* Angiosarcomas, a heterogeneous group of sarcomas with specific  
813 behavior depending on primary site: a retrospective study of 161 cases. *Annals of*  
814 *Oncology* **18**, 2030–2036 (2007).

815 4. Young, R. J., Brown, N. J., Reed, M. W., Hughes, D. & Woll, P. J. Angiosarcoma.  
816 *The Lancet Oncology* **11**, 983–991 (2010).

817 5. Agulnik, M. *et al.* An open-label, multicenter, phase II study of bevacizumab for  
818 the treatment of angiosarcoma and epithelioid hemangioendotheliomas. *Ann Oncol* **24**,  
819 257–263 (2013).

- 820 6. Maki, R. G. *et al.* Phase II study of sorafenib in patients with metastatic or recurrent  
821 sarcomas. *J Clin Oncol* **27**, 3133–3140 (2009).
- 822 7. Magrini, E. *et al.* Complement activation promoted by the lectin pathway mediates  
823 C3aR-dependent sarcoma progression and immunosuppression. *Nat Cancer* **2**, 218–232  
824 (2021).
- 825 8. Petitprez, F. *et al.* B cells are associated with survival and immunotherapy response  
826 in sarcoma. *Nature* **577**, 556–560 (2020).
- 827 9. Somaiah, N. *et al.* Durvalumab plus tremelimumab in advanced or metastatic soft  
828 tissue and bone sarcomas: a single-centre phase 2 trial. *The Lancet Oncology* **23**, 1156–  
829 1166 (2022).
- 830 10. Tawbi, H. A. *et al.* Pembrolizumab in advanced soft-tissue sarcoma and bone  
831 sarcoma (SARC028): a multicentre, two-cohort, single-arm, open-label, phase 2 trial.  
832 *Lancet Oncol* **18**, 1493–1501 (2017).
- 833 11. D’Angelo, S. P. *et al.* Combined KIT and CTLA-4 Blockade in Patients with  
834 Refractory GIST and Other Advanced Sarcomas: A Phase Ib Study of Dasatinib plus  
835 Ipilimumab. *Clin Cancer Res* **23**, 2972–2980 (2017).

836

837 **7. Although the last integrative analysis presented in Figure 6 brings together the**  
838 **different aspects analyzed in this study, it is unclear what it means in the**  
839 **perspective of heterogeneity of STS subtypes. Some subtypes are enriched in**  
840 **specific proteomic clusters which are then enriched in different immune signatures,**  
841 **but still, there is a lot of variability on how HC are distributed.**

842 **Response:**

843 We apologize for the incomplete description and summary in Figure 6. In concordant  
844 with the reviewer’s comment, the aim of Figure 6 is to present the result of integrative  
845 analysis across the histological subtypes, hierarchical cluster, proteomic subtyping, and  
846 immune subtyping. In our previous analysis, we focused on presenting how immune  
847 subtyping could uncover the inner heterogeneity of TME in a distinctive proteomic  
848 subtype. Particularly, the samples of PC-Ra could be further divided into IM-S-1 and  
849 IM-S-3, where IM-S-3 showed higher immune cell infiltrations and immune checkpoint  
850 inhibitors (**Figure 6A**). In the revised version, we added the interaction analysis

851 between hierarchical clusters and proteomic clusters or immune clusters to further  
 852 illustrate the distribution of hierarchical clusters and correlated proteomic features.

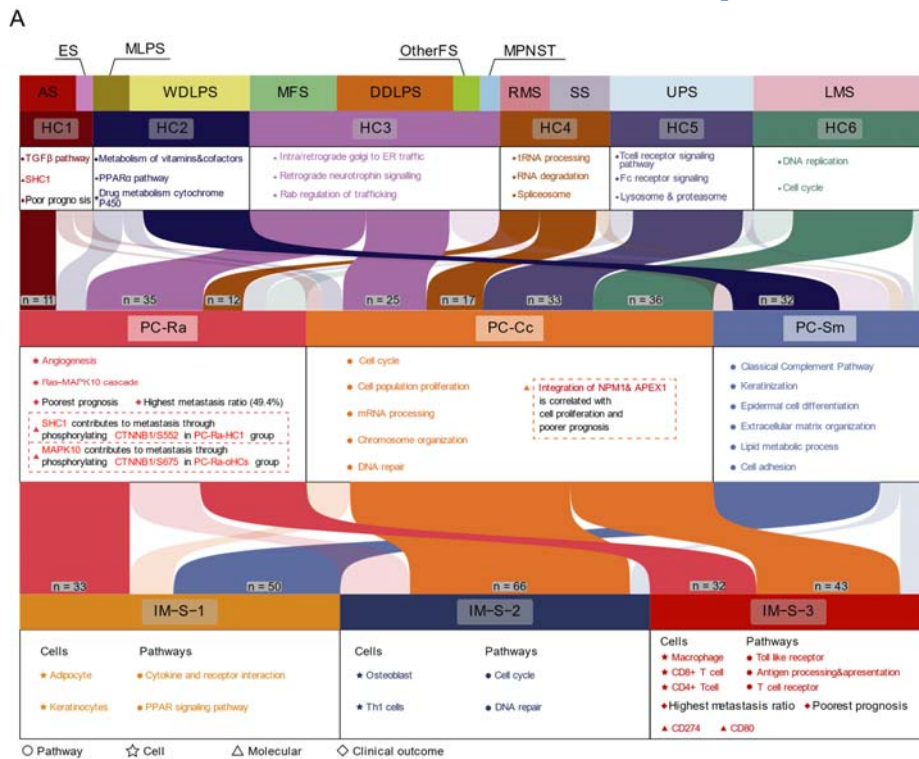

853 **Figure RL6. Integration analysis of clustering result from different levels**

854 (A) Graphical summary showing the characteristic pathways and major molecular findings of  
 855 different level subtypes including histologic subtypes, hierarchical clusters, unbiased consensus  
 856 proteomic clusters, and immune clusters. The relationships of these subtypes are also displayed.

857  
 858 Firstly, we portrayed Sankey plots with hierarchical clusters as the center to present the  
 859 concordance among histological sarcoma subtyping, hierarchical clustering, proteomic  
 860 subtyping, and immune subtyping (**Figure RL6B-C**). As a result, for the relationship  
 861 between hierarchical clusters and proteomic subtyping, we observed more than half of  
 862 the HC2 patients (MLPS and WDLPS) were grouped into PC-Sm (32 of 47) and HC5  
 863 (UPS) and HC6 (LMS) were both mainly clustered into RC-Cc (HC5: 33 of 43, HC6:  
 864 36 of 52). Besides, HC3 (MFS, OtherFS, DDLPS, and MPNST) and HC4 (RMS and  
 865 SS) were mainly distributed into two proteomic subtypes: PC-Ra (HC3: 35 of 75; HC4:  
 866 12 of 33) and PC-Cc (HC3: 25 of 75; HC4:17 of 33). These results revealed our  
 867 proteomic subtyping could uncover the heterogeneity within the two HCs and also  
 868 common proteomic features that might be shared by samples from diverse HCs (**Figure**

869 **RL6B-C).**

870

871 Meanwhile, as for the relationships between hierarchical clusters and immune clusters,  
872 the immune features of samples belonging to HC2, HC4, HC5, and HC6 showed  
873 concordance within each HC. Specifically, 35 out of 47 samples of HC2 were grouped  
874 into IM-S-1, 20 out of 27 samples of HC4 were clustered into IM-S-2, and 28 out of 43  
875 samples of HC5 were grouped into IM-S-3 (**Figure RL6B-C**). On the other hand, the  
876 immune heterogeneity within the distinguished HCs was observed in HC1 and HC3.  
877 Samples belonging to these two HCs were mainly distributed into IM-S-1 and IM-S-3  
878 equally (HC1: 12 in IM-S-1 and 9 in IM-S-3; HC3: 30 in IM-S-1 and 30 in IM-S-3).

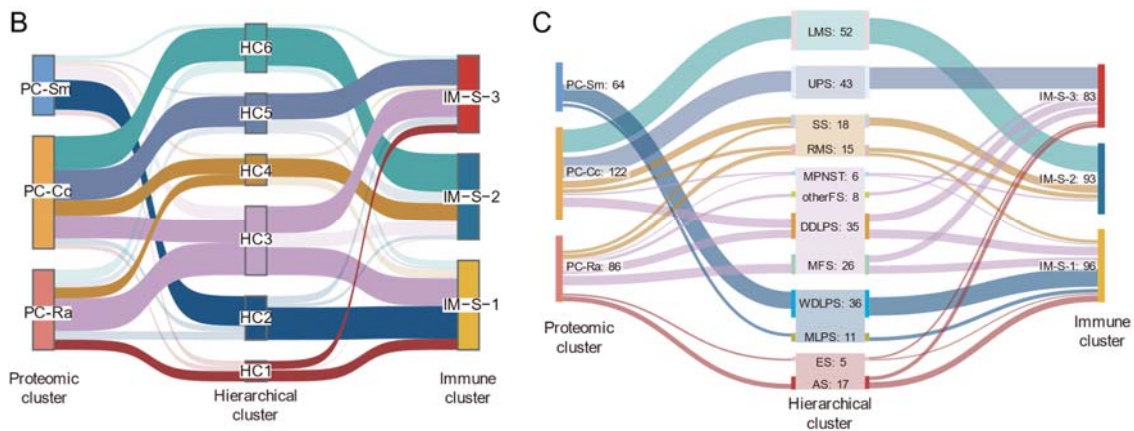

879 **Figure RL6.** (B) Sankey plot illustrating relationships between hierarchical clusters and  
880 proteomic clusters or immune clusters; (C) Sankey plot illustrating relationships between  
881 sarcoma histology subtypes and proteomic clusters or immune clusters.

882

883 In the revision, we performed further analysis to decipher the diverse proteomic and  
884 immune features within one hierarchical clustering. Specifically, we focused on HC3  
885 which showed proteomic and immune environment diversity and could be clustered  
886 into 2 proteomic clusters (PC-Ra and PC-Cc) and 2 immune clusters (IM-S-1 and IM-  
887 S-3). According to the distribution of HC3 in proteomic and immune clusters, we  
888 classified HC3 into 4 subgroups: HC3-Ra-IM1, HC3-Ra-IM3, HC3-Cc-IM1, and HC3-  
889 Cc-IM3 and performed further analysis to illustrate the potential link between  
890 proteomic and immune features. As a result, comparing the proteomic features among  
891 the four subgroups revealed that although comparing to HC3-Cc-IM1 and HC3-Cc-IM3,

892 both HC3-Ra-IM1 and HC3-Ra-IM3 showed elevated expression of MAPK10 which  
 893 is the distinctive feature of PC-Ra, the protein expression of MAPK10 was significantly  
 894 higher in HC3-Ra-IM3 (**Figure RL6D**). Meanwhile, comparing the immune features  
 895 among the four subgroups, we observed that the immune scores of HC3-Cc-IM3 and  
 896 HC3-Ra-IM3 were obviously higher than the other two subgroups (**Figure RL6E**).  
 897 Intriguingly, the enrichment of CD4<sup>+</sup> T cells and the immune checkpoint protein CD274  
 898 was obviously higher in HC3-Ra-IM3 ((**Figure RL6F-G**).

899

900 The above observations implied the potential link between MAPK10 and elevated  
 901 expression of CD274. Since MAPK10 is a kinase, to illustrate the mechanism  
 902 underlying this potential link, we screened the phosphorylation level of MAPK10's  
 903 substrates and found the phosphorylation of the CTNNB1 at Ser675 was significantly  
 904 correlated with both the protein expression of MAPK10 and CD274. Previous  
 905 researches have reported that the phosphorylated CTNNB could interact with  
 906 transcription factor and promote the transcription of CD274 (*J Exp Med*, PMID:  
 907 32860047). Thus, the elevated expression of CD274 was probably led by the MAPK10-  
 908 mediated phosphorylation signal transduction. Our results revealed the diverse  
 909 proteomic features and immune features within one HC, and further indicated the  
 910 potential link between them.

D

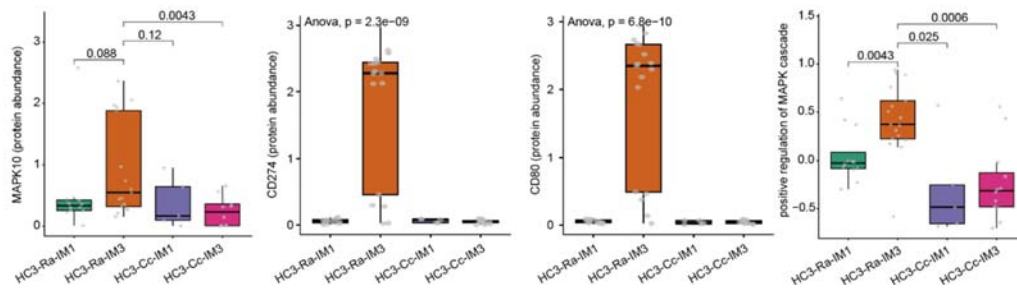

E

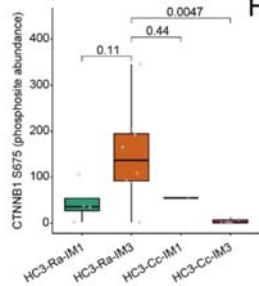

F

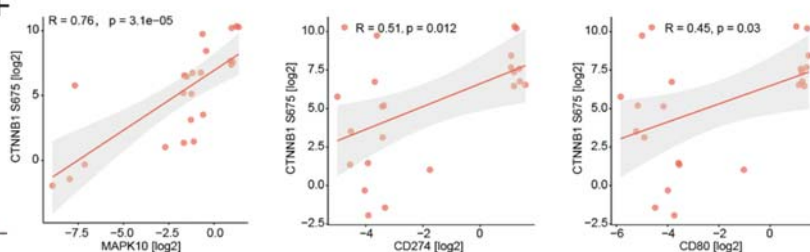

911 **Figure RL6.** (D) Boxplots illustrating enrichment of protein abundance of MAPK10, the  
 912 phosphorylation level of CTNNB1 Ser675, and the signaling pathway, “positive regulation of  
 913 MAPK cascade” in the HC3-Ra-IM3. (E) Boxplot illustrating enrichment of CTNNB1 Ser675  
 914 in HC3-Ra-IM3. (F) Scatter plots present positive correlations between phosphorylation level  
 915 of CTNNB1 Ser675 and protein abundance of MAPK10, CD274, or CD80 in HC3 group.  
 916

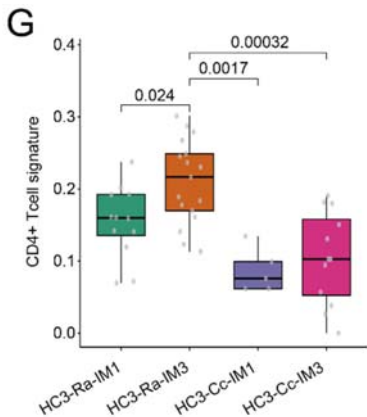

917 **Figure RL6.** (G) Boxplots illustrating the enrichment of CD4<sup>+</sup> T cell signature in HC3-Ra-IM3.  
 918  
 919 Noticeably, besides the heterogeneity within one HC, the diverse immune features  
 920 between HCs were also observed. Specifically, HC5 (UPS) and HC6 (LMS) were both  
 921 clustered into PC-Cc and featured with fast tumor cell proliferation, which could be  
 922 confirmed by the elevated cell proliferation index (**Figure RL6H**). Yet, the two HCs  
 923 showed distinctive immune features. Particularly, the HC5 showed elevated CD8<sup>+</sup> T  
 924 cell infiltration (**Figure RL6I**). To illustrate the potential mechanism, we compared the  
 925 protein expression and pathway enrichment scores of immune-related processes  
 926 between HC5 and HC6. As a result, we observed the dominant enrichment of the TCR  
 927 signaling pathway in HC5, and TCR-related proteins such as PTPN6, NFKBIE, IKBKG,  
 928 BCL10, etc. were significantly elevated in HC5 (**Figure RL6I**). These observations  
 929 suggested that even presenting the same proteomic features, the hierarchical clusters  
 930 could have different TME features, which supported the necessity of clustering from



931 different levels.

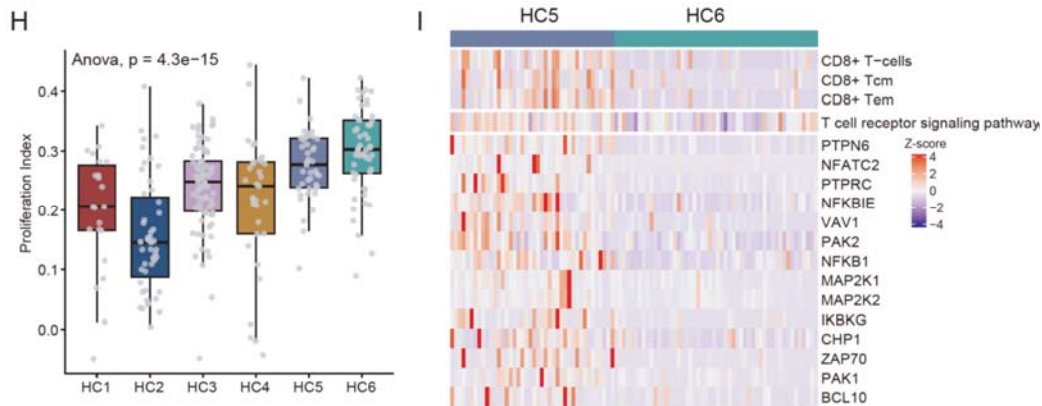

932 **Figure RL6.** (H) The boxplot presents proliferation index in different hierarchical clusters; (I)  
933 The heatmap presents the enrichment of CD8<sup>+</sup> T cells, T cell receptor signaling pathway, and  
934 related proteins in HC5.

935

936 In sum, we performed clustering from three aspects: histology (hierarchical clustering),  
937 proteome, and immunology. From the hierarchical clustering, we found the similarity  
938 of variable histological subtypes of sarcoma. From the proteomic clustering, we found  
939 key kinases and biological pathways to distinguish sarcoma patients. From the  
940 immunology clustering, we uncovered TME heterogeneity of sarcoma and clinically  
941 related immune features. Integration of these three clustering systems could give a more  
942 comprehensive definition of sarcoma subgroups and present their specific  
943 characteristics. In the revised version, we updated our statements on **Figure 6** and  
944 **Supplementary Figure 16** and added more details on how the three clustering systems  
945 are associated with each other on lines 790-816 of the “**Results**” section.

946

947 **8. There are some typos and some sentences are not well constructed or are unclear.**  
948 **This is particularly noticeable in the discussion. Some examples below:**

949 **Response:**

950 We appreciate the reviewer’s comments and revised the typos and sentences.  
951 Specifically, our main revisions are presented as follows:

952

953 **Line 73. “A potential explanation is that these mechanisms could not reflect the**

954 **functional effects, as they reside many regulatory layers away from the protein.”**

955 **Response:**

956 Thanks for the comments, we have rewritten the sentence as follows: “A potential  
957 explanation for this phenomenon is that previous researches focus on genomic or  
958 transcriptomic data, which could not panoramically reflect the molecular features of  
959 STS.”

960

961 **Line 106. “It is necessarily required for immune therapy that more detailed  
962 information about the characteristics of immune infiltration and the effective  
963 immune components.”**

964 **Response:**

965 We appreciate the suggestion and we have revised the sentence to the following  
966 sentence: “To enhance the efficiency of immune therapy, it is important to characterize  
967 the diverse immune cell infiltration signatures of STS and to uncover the heterogeneity  
968 of TME in STS.”

969

970 **Line 594. “When considering targeting the molecular in the TGFβ signaling  
971 pathway (such as SHC1), ES might have a similar response with AS.”**

972 **Response:**

973 Thanks for the comment, we have revised the sentence as the following sentence: “Our  
974 data revealed that ES and AS patients might benefit from SHC1 targeting therapy.”

975

976 Besides the above, we have also carefully revised lines 49-119 in the introduction, and  
977 lines 819-924 in the discussion section, please see the revised manuscript for details.

978

979 **Minor comments:**

980 **1. Line 257: “We found the activity level of two pathways enriched in HC1, actin  
981 cytoskeleton reorganization (Pearson’s correlation,  $r = 0.21$  p-value = 0.0049) and  
982 epithelial cells migration (Pearson’s correlation,  $r = 0.22$  p-value = 0.0027),  
983 changed \*tightly followed the abundance variation of SHC1 (Figure 2F).**

984

985 I would not say there is a \*tight correlation between SHC1 abundance and  
986 Epithelial cell migration. It is just a correlation.

987 Response:

988 We appreciate the reviewer for this helpful suggestion and we have changed the  
989 sentence to the following sentence: “We found there’re significantly positive  
990 correlations between protein abundance of SHC1 and two HC1-enriched biological  
991 pathways, actin cytoskeleton reorganization (Pearson’s correlation,  $r = 0.21$  p-value =  
992 0.0049) and epithelial cells migration (Pearson’s correlation,  $r = 0.22$  p-value = 0.0027).”  
993

994 **2. Fig. 2K it would be better to show in the plot the IC50 of all cell lines individually  
995 and they are only 6.**

996 Response:

997 We thank the reviewer for the comment and we have labeled in the plot the IC50 of all  
998 cell lines individually in Figure 2K (Figure RL7A-C).

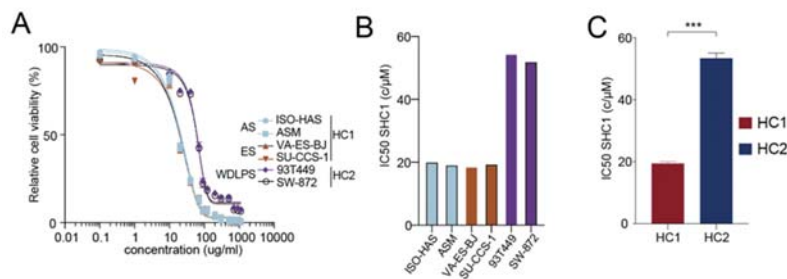

999 **Figure RL7.** (A) Dose-response curves (left panel) and IC50 values (right panel) of  
1000 carbamoylcholine (the SHC1 inhibitor) in AS (blue), ES (purple), and WDLPS (brown) cell  
1001 lines. (B-C) The bar plots indicated the IC50 of six cell lines to SHC1 inhibitor (B, the  
1002 comparison among 6 distinct cell lines, C, the comparison between HC1 and HC2 cluster).

1003

1004 **3. The literature references are not always correct. For example, reference for  
1005 CellX should be 62 (not 63 as mentioned in the text).**

1006 Response:

1007 We thank the reviewer for the comment and we have carefully checked the reference  
1008 and revised the citations accordingly. Furthermore, we have revised all the citations  
1009 through the manuscript.

1010 **Reviewer #2 (Remarks to the Author): Expert in tumour immunology and**  
1011 **immune landscapes in sarcoma**

1012

1013 **The present study undertakes a comprehensive proteomic profiling of 272 STS**  
1014 **patients representing 12 major subtypes. The authors identify six subtypes on the**  
1015 **base of hierarchical classification, three subtypes based on proteomic analysis and**  
1016 **three subtypes based on immune signatures. For some clusters they identified**  
1017 **some mechanism/s relevant for patient prognosis. Interestingly, some of the main**  
1018 **mechanisms identified with bioinformatics approaches are verified by wet**  
1019 **laboratory experiments.**

1020 **The study provides a valuable proteomic resource for the scientists working on**  
1021 **sarcomas. The study is correctly written, although the logic of the analyzes carried**  
1022 **out is not always fluent and sometimes it is difficult to follow.**

1023 **Moreover, there are some concerns:**

1024 **1) The three main clustering analysis should be performed also taking into account**  
1025 **the anatomical site distribution and the therapies applied to the patients, in order**  
1026 **to verify if the clustering may be influenced by the location of the tumor or by the**  
1027 **therapy.**

1028 **Response:**

1029 **We thank the reviewer for the suggestions. We agree with the reviewer that anatomical**  
1030 **site distribution as well as the therapies applied to the patients should be like into**  
1031 **account. In the revision, in order to explore whether the proteomic clustering was**  
1032 **influenced by anatomical site distribution etc., comparative analyses were made among**  
1033 **the 3 proteomic clusters, respectively.**

1034

### 1035 **1. Correlation of proteomic clustering and anatomical site distribution**

1036 **For the samples collected in our cohort, their anatomical sites could be classified into 5**  
1037 **different locations: extremity (E), head and neck (H), Intraabdominal /pelvis**  
1038 **/retroperitoneum/visceral (IB), Intrathoracic/mediastinal (IT), and Trunk. To assess the**  
1039 **intersection of our proteomic clusters with anatomical sites, we performed a correlation**  
1040 **analysis between proteomic clusters with anatomical sites. As a result, there was no**

1041 significant difference in anatomical sites among the proteomic clusters (p-value = 0.381,  
1042 Chi-square test).

1043

## 1044 2. Correlation of proteomic clusters and drug treatment

1045 All the 272 samples collected in our study were from treatment-naïve patients. All the  
1046 patients received primary resection for sarcomas without any anti-cancer treatments  
1047 prior to surgery. Postoperative surveillance and treatment were conducted consistently  
1048 according to Zhongshan Hospital’s guidelines. Specifically, 64 patients received  
1049 chemotherapies, and 27 patients received target therapies after sugary. We compared  
1050 the overall survival between patients with and without postoperative treatments, and  
1051 observed no significant difference (Log-rank test, p-value > 0.1). We further performed  
1052 a correlation analysis between postoperative treatment and our proteomic clusters to  
1053 assess. As a result, there was no significant difference in the distribution of postoperative  
1054 treatment among the proteomic clusters (p-value = 0.633 (target therapy) & 0.077  
1055 (chemotherapy), Chi-square test, **Table RL3**).

1056

1057 In addition, statistical analysis uncovered that there’s no significant difference of age  
1058 and gender among proteomic clusters (p-value = 0.264 (age) & 0.916 (gender), Chi-  
1059 square test, **TableRL3**). These results indicated that the proteomic clustering is an  
1060 independent risk factor of the prognosis, which could be better to predict the survival  
1061 time.

1062

1063 **Table RL3.** The baseline characteristics of patients belonging to different proteomic  
1064 clusters.

|                    | Level  | PC1                  | PC2                  | PC3                  | p     | test    |
|--------------------|--------|----------------------|----------------------|----------------------|-------|---------|
|                    | n      | 86                   | 122                  | 64                   |       |         |
| age (median [IQR]) |        | 55.00 [43.50, 64.00] | 56.00 [47.00, 63.75] | 58.50 [49.75, 64.25] | 0.264 | nonnorm |
| gender (%)         | female | 44 (51.2)            | 66 (54.1)            | 34 (53.1)            | 0.916 |         |
|                    | male   | 42 (48.8)            | 56 (45.9)            | 30 (46.9)            |       |         |
| target therapy (%) | no     | 42 (82.4)            | 69 (85.2)            | 48 (88.9)            | 0.633 |         |
|                    | yes    | 9 (17.6)             | 12 (14.8)            | 6 (11.1)             |       |         |
| chemotherapy (%)   | no     | 30 (58.8)            | 50 (61.7)            | 42 (77.8)            | 0.077 |         |
|                    | yes    | 21 (41.2)            | 31 (38.3)            | 12 (22.2)            |       |         |
| location (%)       | E      | 23 (26.7)            | 32 (26.2)            | 24 (37.5)            | 0.381 |         |
|                    | H      | 5 (5.8)              | 2 (1.6)              | 2 (3.1)              |       |         |
|                    | IB     | 35 (40.7)            | 59 (48.4)            | 21 (32.8)            |       |         |
|                    | IT     | 11 (12.8)            | 10 (8.2)             | 6 (9.4)              |       |         |
|                    | Trunk  | 12 (14.0)            | 19 (15.6)            | 11 (17.2)            |       |         |

1065 In sum, there was no significant difference in the distribution of the anatomical site  
1066 distribution or the therapies applied to the patients among the proteomic clusters. In the

1067 revision, we have updated these comparative analyses in the “**Result**” section on lines  
1068 439-444 in the revised manuscript.

1069

1070 **2) in figure 5A complement and coagulation cascade pathways are enriched in the**  
1071 **IM-S-1 cluster corresponding to the stroma-enriched subtype and B cells in the**  
1072 **IM-S-2. Results already published on the role of complement activation and B cells**  
1073 **in sarcomas (doi: 10.1038/s43018-021-00173-0 and doi: 10.1038/s41586-019-1906-**  
1074 **8) should be mentioned and discussed. Are the main findings of these two papers**  
1075 **true by proteomic point of view? For example, is the C3aR or complement soluble**  
1076 **proteins/receptors expression associated with M2-like macrophages and/or UPS**  
1077 **patient survival? Are B cell markers associated with increased overall survival?**  
1078 **Do they correlate with metastasis?**

1079 **Response:**

1080 We thank the reviewer for the instructive suggestion. As commented by the reviewer,  
1081 in our research, by performing immune cell deconvolution and immune features-based  
1082 clustering, we classified our pan-sarcoma dataset into 3 immune subtypes with  
1083 distinctive immune characteristics. Specifically, we found the IM-S-1 featured with  
1084 complement and coagulation cascade, and IM-S-2 featured with B cell enrichment.  
1085 Following the reviewer’s suggestion, we summarized the main findings of the two  
1086 transcriptomic papers and added further analysis to investigate whether their findings  
1087 on sarcoma tumor microenvironment could be validated at the proteomic level. The  
1088 detailed analyses for each paper were presented as follows:

1089

1090 **1. About the impact of complement activation on sarcoma progression.**

1091 The first paper conducted by Magrini and colleagues performed a systematic  
1092 assessment of complement activation and effector pathways in sarcomas. Their main  
1093 findings were: (1) they utilized a mice model and found that C3 and its receptor C3aR  
1094 promoted 3-MCA-induced sarcoma genesis; (2) they found that C3 and C3aR  
1095 participated in macrophage recruitment; (3) they used TCGA data to confirm C3  
1096 deficiency-associated signatures of macrophages related to favorable prognosis. We  
1097 then investigated their main conclusions in our data. Particularly:

1098 **1.1 The expression of C3 is elevated in the tumor tissues of our sarcoma cohort.**  
1099 Since the Magrini, et.al. reported the role of C3-C3aR in sarcoma genesis, especially in  
1100 UPS, we then evaluated the expression of C3 and C3aR in the tumors and NATs. As a  
1101 result, we observed significantly elevated expression of C3 in our pan-sarcoma cohort  
1102 (**Figure RL8A**). We further evaluated the expression of C3 in the 12 histological  
1103 subtypes and observed the protein expression of C3 was significantly elevated in tumors  
1104 of DDLPS, MLPS, MFS, et al (**Figure RL8A**).

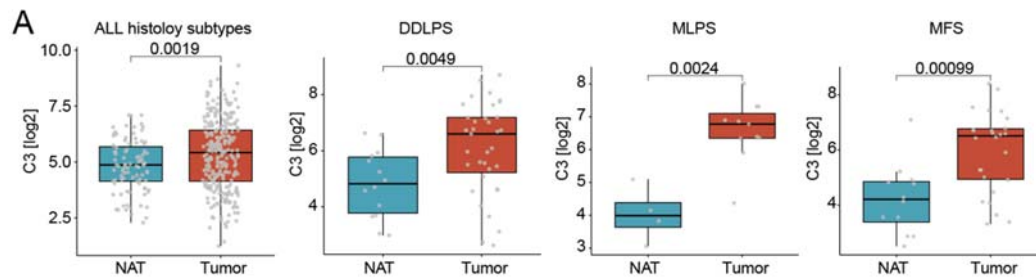

1105 **Figure RL8. Impacts of C3-C3aR axis and B cell markers from the proteomic viewpoint.**

1106 (A) Boxplots illustrate the proteomic expression of C3 in NATs and tumors.

1107

1108 As for C3aR, its expression was detected in 3 samples, thus it was excluded for further  
1109 analysis. This might be caused by the fact that the C3aR is a membranal protein and is  
1110 enriched in macrophages. Since Magrini et al. have reported that C3aR promotes  
1111 sarcoma progression through lectin pathway, we further evaluated the enrichment of  
1112 lectin signaling pathway between tumors and NATs, and found that the enrichment  
1113 scores of lectin signaling pathway were significantly higher in tumors of our pan-  
1114 sarcoma cohort, and in tumors of histological subtypes, like UPS, DDLPS, MFS, et al.  
1115 (**Figure RL8B**). These results revealed the elevation of C3 and lectin signaling  
1116 pathways in sarcoma tumor tissues, especially in UPS at the proteomic level, and  
1117 confirmed its role in sarcoma genesis.

1118

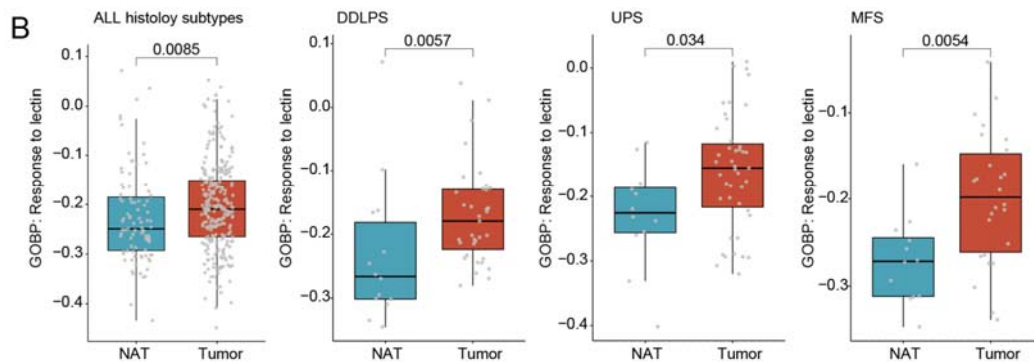

1119 **Figure RL8.** (B) Boxplots present the enrichment scores of the lectin signaling pathway in  
 1120 NATs and tumors.

1121

1122 **1.2 The protein abundance of C3 presents a positive correlation with macrophage**  
 1123 **signature.**

1124 Another major finding reported by Magrini, et al. is the role of C3 in macrophage  
 1125 recruitment. To verify this conclusion in our pan-sarcoma proteomic cohort, we  
 1126 performed a correlation analysis between the protein expression of C3 and macrophage  
 1127 signature. As a result, the protein expression of C3 was observed to be positively  
 1128 correlated with the enrichment of macrophages in our pan-sarcoma cohort and in  
 1129 histological subtypes LMS, SS, WDLPS, and AS (**Figure RL8C, D**). These results  
 1130 indicated the role of C3 in recruiting macrophages in sarcomas.

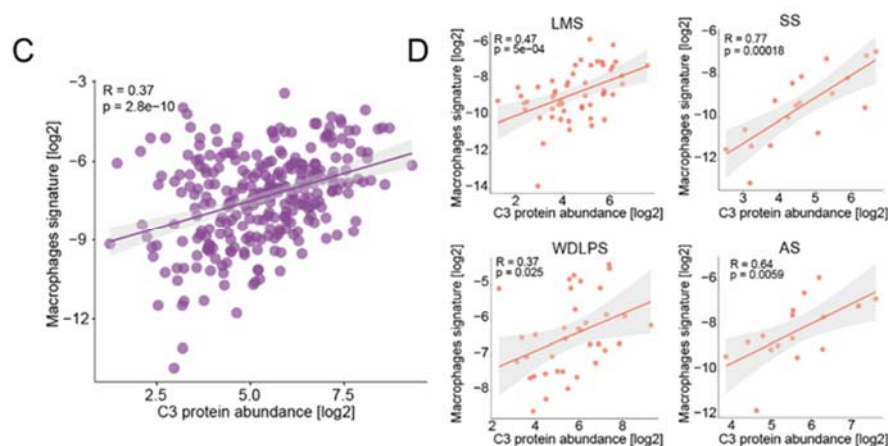

1131 **Figure RL8.** (C) The scatter plot presents a positive correlation between C3 protein abundance  
 1132 and macrophage signatures in pan-sarcoma; (D) Scatter plots presents a positive correlation  
 1133 between C3 protein abundance and macrophage signatures in LMS, SS, WDLPS, and AS.



1134

1135 **1.3 The C3 deficiency-associated signatures of macrophages is related to patients'**  
1136 **favorable prognosis.**

1137 We first evaluated the prognostic relevance of the C3's protein expression. As a result,  
1138 the protein expression of C3 showed no significant correlation with patients' prognosis  
1139 (**Figure RL8E**). Consistently, Magrini and colleagues evaluated the correlation  
1140 between mRNA expression of C3 and prognosis utilizing transcriptomic data in TCGA  
1141 SARC and they also didn't get access to a positive result. Then to further investigate  
1142 the prognostic role of C3, Magrini, et al. focused on C3-recruited macrophages and  
1143 established a signature to represent sarcoma-infiltrated macrophages with the C3-  
1144 deficiency phenotype and evaluated its prognostic relevance. As a result, they found  
1145 high C3-deficiency macrophage signature was associated with increased overall  
1146 survival times in TCGA SARC cohort. To estimate whether this finding could be  
1147 confirmed at the proteomic level, we calculated the C3-deficiency macrophage  
1148 signature utilizing the proteomic data in our cohort following the same method as  
1149 Magrini, et al. described. As a result, we observed a significantly positive association  
1150 between the C3-deficiency macrophage signature and patients' favorable outcomes in  
1151 our pan-sarcoma cohort (**Figure RL8F**). These results confirmed the C3 deficiency-  
1152 associated signature of macrophages is related to patients' favorable prognosis at the  
1153 proteomic level and implies the potential of using C3 deficiency-associated signatures  
1154 of macrophages as the prognostic index for sarcoma in the future.

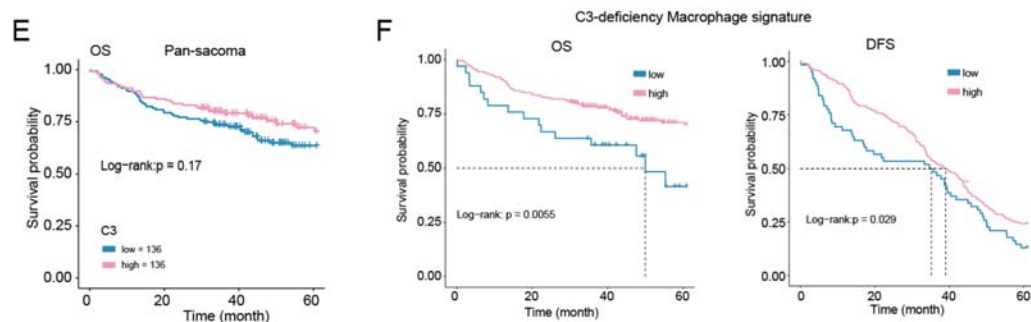

1155 **Figure RL8.** (E) Kaplan-Meier curve for OS stratified by C3 proteomic abundance in pan-  
1156 sarcoma; (F) Kaplan-Meier curves for OS and DFS stratified by levels of C3-deficiency  
1157 macrophage signatures in pan-sarcoma;

1158

1159 **2. About the B cells are associated with survival in sarcoma.**

1160 The second paper conducted by Petitprez, et al. presented an immune classification of  
1161 soft tissue sarcomas and identified B cells as a prognostic factor for sarcomas. We then  
1162 evaluated the prognostic relevance of B cells in our dataset.

1163

1164 **2.1 The enrichment of B cells is associated with the prognosis in specific sarcoma**  
1165 **histological subtypes.**

1166 We first estimated the enrichment of B cells using ssGSEA algorithm based on B cell  
1167 signatures from xCell (*Genome Biol*, PMID: 29141660) and investigated its association  
1168 with patients' prognosis. As a result, although we didn't observe a significant  
1169 association between B cell enrichment and patients' prognosis in our whole pan-  
1170 sarcoma cohort, we observed that LMS, UPS, MFS, and AS patients with high B cell  
1171 signatures trended to have longer overall survival times (**Figure RL8G**).

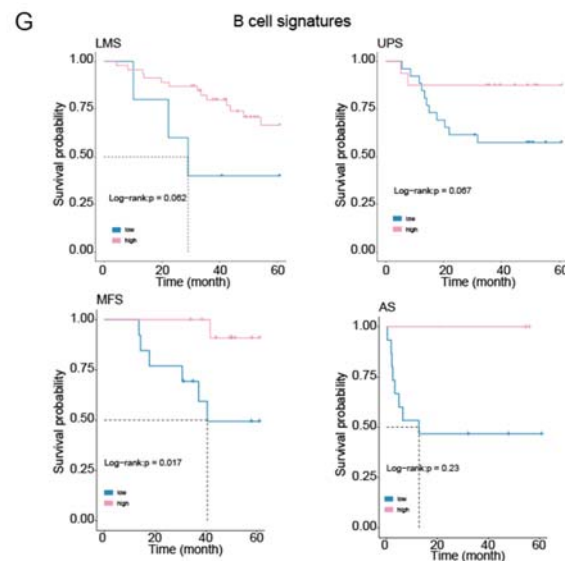

1172 **Figure RL8.** (G) Kaplan-Meier curve for OS stratified by B cell signatures in LMS, UPS, MFS,  
1173 and AS.

1174

1175 **2.2 Some B cell markers are relevant to prognosis at the proteomic level.**

1176 Based on Petitprez et al.'s finding, which indicated the prognostic relevance of B cells  
1177 in sarcomas, we further evaluated the clinical applicability of utilizing specific B cell  
1178 markers as a prognostic index for sarcomas. We investigated the association between  
1179 the protein expression of B cell markers (referring to the human cell marker database

1180 [http://xteam.xbio.top/CellMarker/]) and patients' prognosis. As a result, among the 12  
 1181 B cell markers that have been detected in our dataset, 7 B cell markers showed  
 1182 significant association with patients' prognosis in our pan-sarcoma cohort. We further  
 1183 verified the prognostic relevance of these 7 B cell markers in TCGA dataset and found  
 1184 3 out of 7 B cell markers (PTPRC, CD9, IGLL5) showed consistent prognostic  
 1185 relevance at the transcriptomic level in TCGA SARC cohort (*Cell*, PMID: 29100075)  
 1186 (Figure RL8H). These results imply the potential clinical utilization of these B cell  
 1187 markers for prognostic prediction in future.

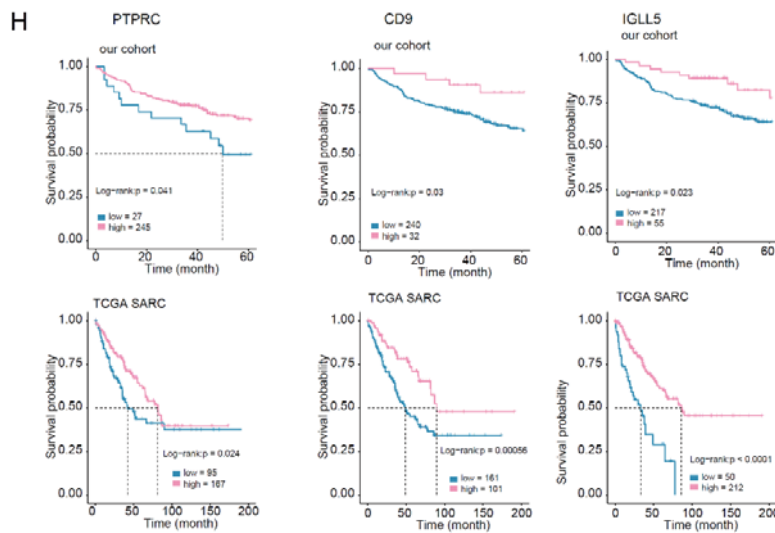

1188 **Figure RL8 (H)** Kaplan-Meier curve for OS stratified by B cell markers. top: our cohort,  
 1189 stratified by proteomic abundance; bottom: TCGA SARC cohort, stratified by mRNA  
 1190 expression.

1191  
 1192 We thank the reviewer for suggestions about the comparative analysis between our  
 1193 study and these two researches. In the revision, we investigated the major findings of  
 1194 those two papers in our proteomic data. As a result, we verified the high expression of  
 1195 C3 in sarcoma tissues and the positive correlation between C3 protein abundance and  
 1196 macrophage signature. Utilizing proteomic data to establish the C3-deficiency  
 1197 macrophage signature, we further proved the availability of this signature in predicting  
 1198 prognosis. Meanwhile, we found high B cell signature is correlated with increased  
 1199 overall survival times in specific sarcoma histological subtypes, especially in MFS.  
 1200 Specific B cell markers, including PTPRC, CD9, and IGLL5, have prognostic relevance

1201 at both proteomic and transcriptomic levels. We have updated the above findings in the  
1202 “**Discussion**” sections of our revised manuscript on lines 858-885 and **Supplementary**  
1203 **Figure 17**.

1204

1205 **3) The authors should discuss some limitations of the study, such as:**

1206 **- the requirement of future validation in independent cohorts.**

1207 **- considering the extensive intra-tumoural heterogeneity, the inability of bulk**  
1208 **proteomic approach to dissect the contribution of distinct heterogenous tumour**  
1209 **regions.**

1210 **- the study is based on localised disease, thus it will have to be determined if these**  
1211 **findings will be true also for locally relapsed and metastatic tumours.**

1212 **Response:**

1213 Thank the reviewer for the comment. We have added Limitations in the discussion  
1214 section of the revised manuscript as following:

1215

1216 ***Limitations***

1217 The aims of this study were to provide a proteomic and phosphoproteomic landscape  
1218 to decipher the molecular heterogeneity of sarcomas, the prognosis-related markers,  
1219 and abnormally changed biology pathways. There are some limitations due to the  
1220 sample collection and technology as follows:

1221 (1) The sarcoma cohort in this study is single-centered from Fudan University,  
1222 Zhongshan Hospital and included only Chinese patients, so the conclusions may  
1223 lead to potential selection bias. Additional prospective studies are needed to  
1224 validate our findings in multi-center and cohort of other ethnicities.

1225 (2) We found specific subtype-enriched proteins which might be serviceable in early  
1226 diagnosis and histological subtype detection, but we couldn't exclude the  
1227 possibility that this protein could have stemmed from other affected organs or may  
1228 be indirectly induced by the effects of the tumors on their microenvironment or  
1229 even systemically. Further experiments or clinical data are necessary complement  
1230 to validate the roles of this proteins in sarcoma.

1231 (3) The proteomic data in this study was generated through bulk proteomic approach

1232 from tumor and NAT tissues and couldn't fully reflect the heterogenous tumor  
1233 regions and the tumor-NAT boundary regions. Integrating single cell and spatial  
1234 omics would be useful to further explore the intra-tumoral heterogeneity in the  
1235 future research.

1236 (4) The samples in this study were all collected from treat-naïve patients and were all  
1237 primary tumors without remote metastasis or local relapse. The information about  
1238 metastasis and local relapse come from 60-month follow up. The conclusion in this  
1239 study that SHC1 and MAPK10 promotes metastasis required further confirmatory  
1240 studies on metastatic samples. Other conclusions were also just based on localised  
1241 diseases, it will have to be determined if these conclusions are also tenable in  
1242 locally relapsed and metastatic tumors.

1243

1244 Please see the details on the end of the '**Discussion**' section in the revised manuscript.

1245

1246 **Reviewer #3 (Remarks to the Author): Expert in MS-based cancer proteomics**

1247

1248 **Comments on "Proteomic characterization identifies clinically relevant subgroups**  
1249 **of soft tissue sarcoma" by Tang et al.**

1250 **The authors present proteome data from 272 soft tissue sarcoma tissues and 91**  
1251 **matched tumor-adjacent tissues (total of 363 samples). In addition,**  
1252 **phosphoproteome data were generated from 138 sarcoma and 24 tumor-adjacent**  
1253 **tissues. Data analysis is based on clustering the data, extract functional predictions**  
1254 **from the clusters, and follow-up with some cell line experiment to understand the**  
1255 **role of top-scoring proteins in the specific functional categories. The authors are -**  
1256 **in general – overstating the evidence from the molecular mechanisms they are**  
1257 **interrogating (see comments). Overall, I did not find the study to be very exciting.**  
1258 **I think that Nature Communications is a good place for resource-style papers like**  
1259 **this, and proteomics studies on soft tissue sarcoma have the potential to help us**  
1260 **better understand the diseases and to identify new treatment strategies. Also, 361**  
1261 **sample is a quite large number. What I am missing is evidence that proteomics is**  
1262 **adding crucial information beyond what we know about the disease. I also think**

1263 **that the follow-up experiments need more depth. I am on the fence regarding**  
1264 **recommending to consider a publication after major revisions, but I am happy to**  
1265 **look the manuscript after the below comments have been addressed.**

1266

1267 **(1) The authors state that 15,552 proteins were identified across all samples with**  
1268 **an average of 5,593 proteins being quantified per sample on average. It is very**  
1269 **unlikely that 5.5 k proteins per sample using unfractionated sample leads to a total**  
1270 **of > 15 k proteins across 363 samples. I wonder if the false-discovery filtering at**  
1271 **the protein level was done for each individual sample but not for all datasets**  
1272 **combined. It is the latter, that should have been done. Merely filtering for each**  
1273 **individual run will greatly inflate the protein FDR for the entire dataset (as false**  
1274 **assignments will be different for each run). It is also not clear if a parsimony**  
1275 **filtering was used on the identified proteins. This should also be done the combined**  
1276 **dataset. The same question applies to the phosphoproteomics analysis: was the**  
1277 **filtering done on the combined dataset (which it should have been) or only on each**  
1278 **individual dataset?**

1279 **Response:**

1280 We sincerely thank the reviewer for the comment and apologize for the unclear  
1281 description of protein identification methods in our previous manuscript. In our  
1282 research for each experiment, we employed “Firmiana” a one-stop proteomic cloud  
1283 platform (*Nat Biotechnol*, PMID: 28486446) for protein quantification. To optimize  
1284 the number of proteins identified, we applied a very stringent filter with 1% FDR at the  
1285 peptide level and 1% FDR at the protein level. The same cutoff strategies of FDR at  
1286 protein/peptide level based on label-free quantification have been widely used in recent  
1287 researches (*Nature*, PMID: 30814741; *Cell*, PMID: 32649877; *Nat Commun*, PMID:  
1288 28429721; *Nat Commun*, PMID: 29520031). As a result, an average of 5,593 proteins  
1289 was quantified per sample. To count the total identified proteins, we combined all the  
1290 experiments and 15,552 proteins were observed, the combined number of identified  
1291 proteins was only utilized for presenting the detected protein numbers, but not utilized  
1292 for further analysis.

1293

1294 In concordant with the reviewer’s suggestion, for all the analyses including hierarchical  
 1295 cluster, proteomic subtyping, tumor microenvironment analysis, etc. we utilized a  
 1296 protein matrix that applied 1% FDR filtering at the protein level for all datasets, which  
 1297 contained 10,118 proteins in total. We further referred to recently published proteomic  
 1298 cohort researches of different cancer types and compared cohort sample size, the  
 1299 average number and the total number of identified proteins between these researches  
 1300 and our study. As a result, both the average and total identified protein numbers were  
 1301 comparable with no significant differences between our study and previously reported  
 1302 samples (**Ref1, Ref2, Ref3, Ref4, Ref5 in Table RL4**).

1303 **Table RL4. The total and average protein numbers of recent proteomic studies and our**  
 1304 **study**

| Reference | Journal     | Quantification method | Cancer & size                                | Average proteins | Total proteins | PMID           |
|-----------|-------------|-----------------------|----------------------------------------------|------------------|----------------|----------------|
| Our study |             | LFQ                   | Sarcoma (272 tumors)                         | 5,593            | 10,118         |                |
| Ref1      | Nature      | LFQ                   | Hepatocellular carcinoma (110 tumors)        | 5,953            | 9,142          | PMID: 30814741 |
| Ref2      | Blood       | TMT                   | Acute myeloid leukemia (44 tumors)           | 5,664            | 10,651         | PMID: 35895896 |
| Ref3      | Cell        | LFQ                   | Lung adenocarcinoma (103 tumors)             | 6,682            | 11,091         | PMID: 32649877 |
| Ref4      | Cell        | SILAC                 | Melanoma (116 tumors)                        | 4,500            | 10,376         | PMID: 31495571 |
| Ref5      | Cancer Cell | TMT                   | Intrahepatic cholangiocarcinoma (262 tumors) | 5,690            | 10,529         | PMID: 34971568 |

1305 Moreover, for the phosphoproteomic analysis, a label-free based quantification analysis  
 1306 was performed using Proteome Discover (version 2.3) (*Cell*, 2020).  
 1307 Phosphorylation sites were localized with ptmRS module (*J Proteome Res*, 2011).  
 1308 Peptide spectrum matches (PSMs) were filtered with 75% localization probability for  
 1309 all phosphorylation sites were included for further analysis. For global  
 1310 phosphoproteomic analysis, the FDR at the peptide level and the protein level were also  
 1311 set as 1%. In total, 37,842 phosphosites belonging to 6,483 phosphoproteins were  
 1312 identified (an average of 7,912 phosphosites belonging to 3,120 phosphoproteins for  
 1313 each individual experiment). We also compared our results with previous published  
 1314 researches. As a result, the number of average and total number of identified  
 1315 phosphosites and phosphoproteins were also comparable with those published  
 1316 researches (**Ref1, Ref2, Ref6 in Table RL5**).

1317

1318 **Table RL5. The phosphosite and phosphoprotein numbers of recent proteomic studies**  
 1319 **and our study.**

| Ref       | Journal               | Quantification method | Cancer & size                         | Average phosphosites | Total phosphosites | Average phospho-proteins | Total phospho-proteins | PMID           |
|-----------|-----------------------|-----------------------|---------------------------------------|----------------------|--------------------|--------------------------|------------------------|----------------|
| Our study |                       | LFQ                   | Sarcoma (272 tumors)                  | 7,912                | 37,842             | 3,120                    | 6,483                  |                |
| Ref1      | Nature                | LFQ                   | Hepatocellular carcinoma (110 tumors) | 8,941                | 22,564             | 1,485                    | 5,277                  | PMID: 30814741 |
| Ref2      | Blood                 | TMT                   | Acute myeloid leukemia (44 tumors)    | 11,817               | 29,201             | 3,609                    | 5,407                  | PMID: 35895896 |
| Ref6      | Cell Reports Medicine | TMT                   | Ovarian HGNC (83 tumors)              | 11,331               | 38,194             | 4,006                    | 7,080                  | PMID: 32529193 |

1320  
 1321 In sum, the combined proteome was only used for presenting the detected protein  
 1322 numbers. As for downstream bioinformatic analysis, the proteomic and  
 1323 phosphoproteomic matrix that have applied FDR filtering for all dataset were utilized,  
 1324 thus our main findings remained unchanged. In the revision, we have added the number  
 1325 of proteins that have applied FDR filtering for all datasets and utilized for analysis:  
 1326 “Proteomic analysis identified 15,552 proteins in total, with 5,593 proteins per sample  
 1327 on average. We then applied FDR filtering for all datasets, and 10,118 proteins were  
 1328 utilized for further analysis.” We have also added the description of the protein and  
 1329 phosphoprotein identification in the “Methods” section, as follows: “For conducting  
 1330 bioinformatic analysis, the proteomic/phosphoproteomic datasets, that have applied  
 1331 FDR filtering for all datasets were utilized.” Please see 153-155 lines in the “**Result**”  
 1332 section and 1052-1055 lines in the “**Methods**” section of the revised manuscript for  
 1333 details.

1334  
 1335 **(2) Peptides/proteins were quantified using a label-free approach (iBAQ).**  
 1336 **Reproducibility is shown in Supp Fig 1 A. I would like to see the median CV across**  
 1337 **all the HEK standard samples as well as the CV in dependence to the signal-to-**  
 1338 **noise ratio.**

1339 **Response:**  
 1340 We sincerely appreciate the reviewer’s comment. In our previous manuscript, for the  
 1341 quality control of MS performance, the HEK293T cell lysate was measured every three  
 1342 days as the quality control standard. A pairwise Pearson’s correlation coefficient was  
 1343 calculated for all quality control runs, and the results showed the median correlation



1344 coefficients of proteome standards were 0.9 (0.85-0.95). We also referred to previously  
1345 published works, and the correlation coefficient of the standards was comparable to our  
1346 results (**Ref 1, Ref 2, Ref3, Ref4, Ref5, Ref6, and Ref7**) (**Table RL6**).

1347

1348 To comprehensively respond to the reviewer's comment, we divided the responses into  
1349 two parts:

1350

### 1351 **1. About the coefficient variations (CVs) across all the HEK standards.**

1352 In the revision, we have calculated the coefficient of variation (CVs) across the 15 HEK  
1353 standards. As a result, the median CVs of HEK293 standards were 0.23 and the mean  
1354 CVs were 0.29 (**Figure RL9A-B**). We also referred to previously published researches,  
1355 and the CVs across replicates of previously published researches were also comparable  
1356 to our results (**Table RL6**)

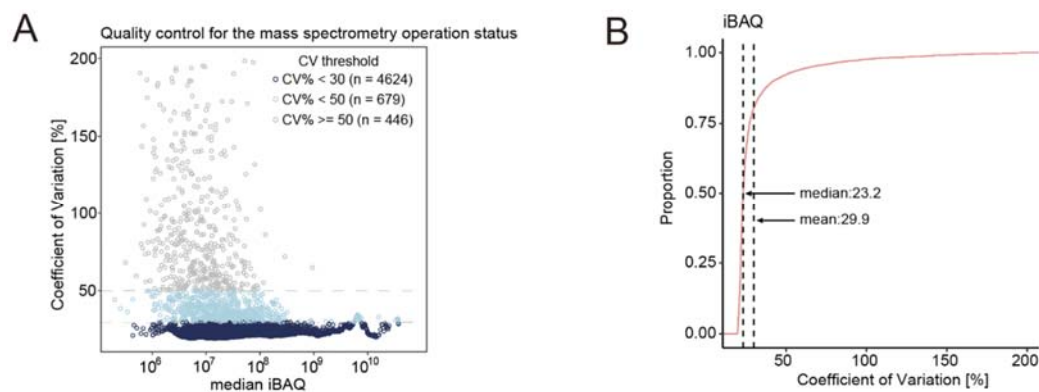

1357

**Figure RL9. CVs and signal-to-noise of the proteomic data**

1358 (A) The scatter plot illustrates the CV of each protein (using iBAQ) across all HEK293 stand  
1359 samples. (B) Cumulative distribution curve illustrating the distribution of CVs.

1360

1361 **Table RL6. The standards' correlations and CVs of our work and recently published**  
1362 **studies**

| Reference | Journal      | Quantification method | CVs                                                                                   | The average correlations of standards | PMID           |
|-----------|--------------|-----------------------|---------------------------------------------------------------------------------------|---------------------------------------|----------------|
| Our study |              | LFQ                   | median:0.23; mean:0.29 (based on iBAQ)<br>median:0.23; mean:0.30 (based on S/N ratio) | 0.9                                   |                |
| Ref1      | Cell         | LFQ                   | median:0.31; mean:0.36                                                                | 0.87                                  | PMID: 31585088 |
| Ref2      | Nature       | LFQ                   | median:0.35; mean:0.44                                                                | 0.93                                  | PMID: 30814741 |
| Ref3      | Cell         | LFQ                   | median:1.02; mean:1.28                                                                | 0.91                                  | PMID: 32649877 |
| Ref4      | Nature       | LFQ                   | median:0.73; mean:1.18                                                                | 0.95                                  | PMID: 25043054 |
| Ref5      | Cell Reports | TMT                   | median:0.85; mean:1.02                                                                | 0.85                                  | PMID: 33086064 |
| Ref6      | Cell         | TMT                   | median:0.99; mean:1.52                                                                | 0.91                                  | PMID: 33212010 |
| Ref7      | Nature       | iTRAQ                 | median:1.29; mean:1.69                                                                | 0.88                                  | PMID: 27251275 |

1363

## 1364 2. About the CVs independence to signal-to-noise (S/N) ratios.

1365 In the revision, following the reviewer's comments, we calculated the CVs across the  
 1366 HEK293 standards based on signal-to-noise (S/N) ratios. As a result, the median CVs  
 1367 was 0.23 and the mean CVs was 0.30 (**Figure RL9C-D**), which were similar to the  
 1368 median and mean CVs calculated based on iBAQs. The correlation between the iBAQ  
 1369 based CVs and S/N ratio based on CVs was around 0.95 (Spearman correlation  $p <$   
 1370  $0.05$ ). These results confirmed the reproducibility for repeat experiments, and  
 1371 demonstrated the consistent stability of our MS platform.

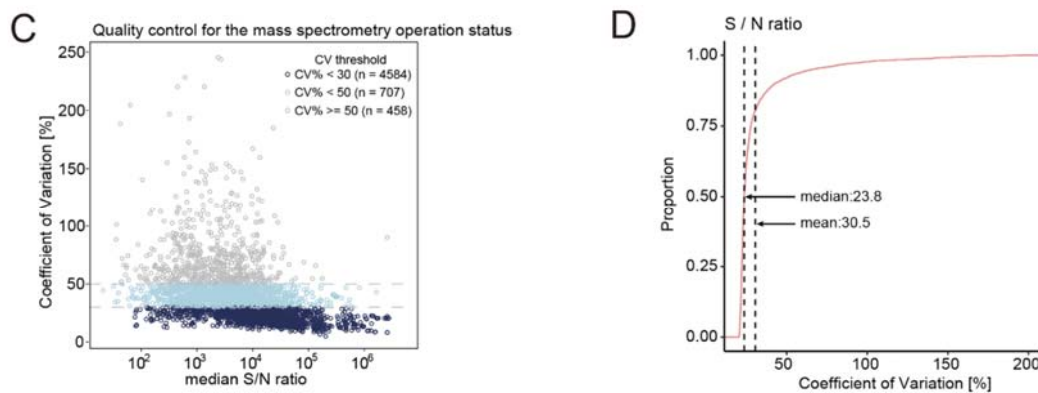

1372 **Figure RL9.** (C) The scatter plot illustrates the CV of each protein (using S/N ratio) across all  
 1373 HEK293 stand samples. (D) Cumulative distribution curve illustrating the distribution of  
 1374 CVs.

1375

1376 In sum, we have added the results of CVs in the supplementary figure X of the revised  
 1377 manuscript, and added the methodologies of CV analysis on lines 161-164 of the  
 1378 “**Methods**” section and 161-164 lines of the ‘**Result**’ section.

1379

1380 **(3) Supp Fig 2 A. The PCA plot shows quite an overlap of NAs and tumor samples.**  
1381 **It would be great to see an unsupervised clustering of NAs and tumor sample and**  
1382 **some cluster purity measurement to evaluate the separation of tumor and normal**  
1383 **samples.**

1384 **Response:**

1385 Thanks for the constructive comment. To systematically respond to the reviewer's  
1386 comments, we divided the response into 3 parts:

1387 **1. The criteria for sample collection and assessments**

1388 In this study, for tumor samples, 272 formalin-fixed, paraffin-embedded (FFPE)  
1389 sarcoma tumor tissues and 91 paired tumor-adjacent tissues were acquired from  
1390 Zhongshan Hospital, Fudan University from 2010 to 2019. One 4  $\mu$ m thick slide from  
1391 each FFPE block was sectioned and stained by hematoxylin and eosin (H&E) for  
1392 histological evaluation. Specifically, each tumor/ tumor adjacent sample was checked  
1393 by three expert pathologists to confirm the sample quality according to the following  
1394 criteria:

1395

1396 For tumor samples: (1) pathologists evaluated and defined tumor area on the slices of  
1397 FFPE specimens with tumor cell rate (tumor purity) > 90%; (2) the histological  
1398 subtypes of sarcoma were diagonalized by pathologists according to WHO  
1399 classification of Soft Tissue & Bone Tumor (*Adv Anat Pathol*, PMID: 32960834). As  
1400 for tumor-adjacent samples: (1) pathologists evaluated and defined the tumor-adjacent  
1401 areas on the slices of FFPE specimens with no tumor cell rate; (2) NATs were chosen  
1402 based on tumor locations and the original lineages of tumors for different histological  
1403 sarcoma subtypes, according to WHO classification of Soft Tissue & Bone Tumor (*Adv*  
1404 *Anat Pathol*, PMID: 32960834).

1405

1406 **2. Unsupervised clustering of NATs and tumor samples.**

1407 In agreement with the reviewer, an unsupervised clustering of tumors and NATs could  
1408 help to illustrate the separation of tumor samples and NATs. Thus, in the revision, we  
1409 conduct unsupervised consensus clustering of NAT and tumor samples with the  
1410 ConsensusClusterPlus R package (*Bioinformatics*, PMID: 204275). The following

1411 detail settings were used: number of repetitions = 1,000 bootstraps; pItem = 0.8  
 1412 (resampling 80% of any sample); pFeature = 1 (resampling 100% of any protein);  
 1413 clusterAlg = “K-means”; and distance = “Euclidean”. As a result, 2 clusters were  
 1414 determined based on the average pairwise consensus matrix within consensus clusters,  
 1415 the delta plot of the relative change in the area under the cumulative distribution  
 1416 function (CDF) curve, and the average silhouette distance for consensus clusters.

1417

1418 We then calculated specificity and purity to evaluate the distribution of tumors and  
 1419 NATs and tumors in these 2 clusters (cluster1: NAT-distance and cluster2: NAT-similar)  
 1420 (**Figure RL10A**). Specifically, for sample’s specificity, the following formula was  
 1421 utilized:  $\text{specificity} = \max \{N_{c1}/N_{\text{total}}, N_{c2}/N_{\text{total}}\}$ .  $N_{\text{total}}$  means the whole number of  
 1422 tumors or NAT samples.  $N_{c1}$  and  $N_{c2}$  mean the samples belonging to cluster1 or cluster2  
 1423 in  $N_{\text{total}}$ . As for cluster purity, the following formula was utilized:  $\text{purity} = \max \{C_N/C_{\text{total}},$   
 1424  $C_T/C_{\text{total}}\}$ .  $C_{\text{total}}$  means the whole number of cluster1 or cluster2.  $C_N$  and  $C_T$  means the  
 1425 numbers of tumors or NATs in  $C_{\text{total}}$ . As a result, in concordant with the PCA analysis,  
 1426 around 89% of the NATs were grouped into cluster1, and 56% of the tumors were  
 1427 grouped into cluster2. Forty-four percent of tumors were grouped with NATs, implying  
 1428 that these tumors might not show significantly diverse proteomic features compared to  
 1429 NATs (**Figure RL10B**). The unsupervised clustering confirmed the results of PCA  
 1430 analysis, we then tried to illustrate the potential reasons under this phenomenon. Since  
 1431 our cohort contained 12 histological types of sarcomas and NATs paired with them also  
 1432 included various tissue types, we then hypothetically assumed that the overlap between  
 1433 tumors and NATs might be caused by the diverse tumor heterogeneity of different  
 1434 histological subtypes of sarcoma.

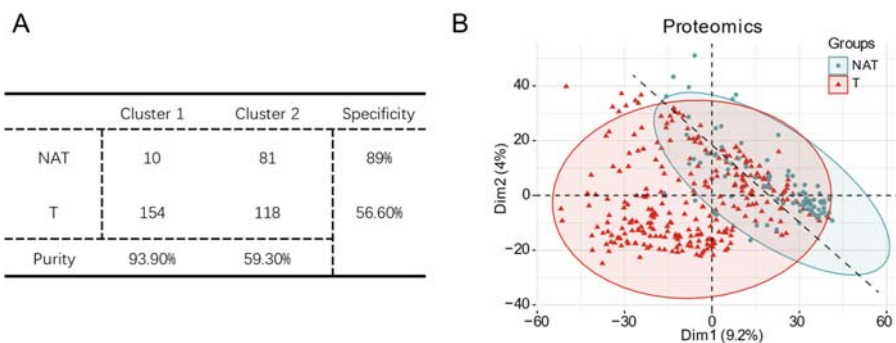

1435

### Figure RL10. Unsupervised clustering of NATs and tumor samples

1436

(A) The table about unsupervised clustering results of NATs and tumor samples;

1437

(B) The PCA result of NATs and tumor samples.

1438

### 3. The overlap between tumors and NATs in PCA analysis might be caused by the tumor heterogeneity of different histological subtypes of sarcomas

1440

1441 To illustrate whether the overlap between tumors and NATs in PCA analysis was  
1442 associated with different histological subtypes of sarcomas, we conducted PCA analysis  
1443 for each histological type of sarcomas, separately. As a result, the tumors were perfectly  
1444 separated with NATs in each histological type of sarcomas. The representative PCAs  
1445 are shown in **Figure RL10C**.

1446

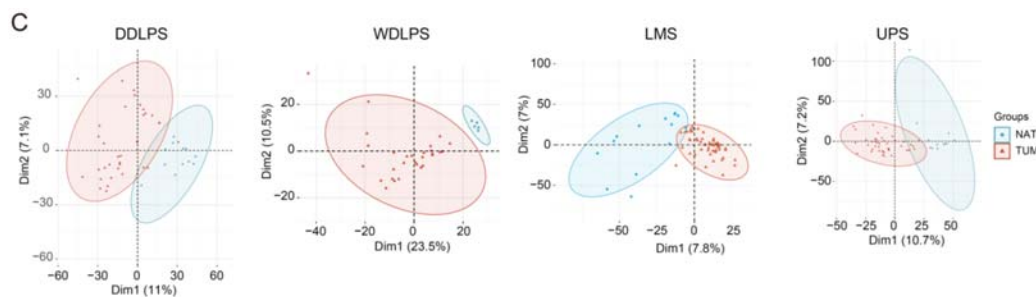

1447 **Figure RL10.** (C) PCA plots illustrate separation levels between NAT and tumor samples in

1448

histological subtypes.

1449

1450 These results confirmed our assumption that the overlap between tumors and NATs was  
1451 caused by the tumor heterogeneity of diverse histological sarcomas, further revealed  
1452 the value of research in deciphering the tumor heterogeneity of different histological  
1453 sarcomas. In the revision, we have added the histological type-based PCA analysis for  
1454 tumors and NATs in **Supplementary Figure 3**. Meanwhile, we added the above  
1455 analysis on lines 169-187 of the **‘Result’** section.

1456

1457 **(4) What criteria were used to define the clusters (HC1-6)? This is not clear based**  
1458 **on the dendrogram alone. The dendrogram implies that there was very clean**  
1459 **clustering histological subtypes. I am missing a plot showing how well the subtypes**

1460 **were separated from each other using unsupervised clustering (see also comment**  
1461 **3).**

1462 **Response:**

1463 We thank the reviewer for the critical comment. We apologize for the unclear  
1464 presentation of the clustering cutoffs and details in our previous manuscript. To  
1465 systematically response to the comment, we will address this comment from 3 aspects:

- 1466 1. The process to create the dendrogram;
- 1467 2. The criteria to determine the cluster number;
- 1468 3. Biological insights based on hierarchical clusters.

1469

## 1470 **2. The process to create the dendrogram**

1471 To investigate the intrinsic common features of STS histological subtypes, we  
1472 employed hierarchical clustering on the 12 STS histologic subtypes. R (version 4.2.0)  
1473 and the R package “factoextra” (version 1.0.7) were utilized for data process and  
1474 visualization.

1475

1476 Firstly, we performed ANOVA analysis to filter proteins with high variable values  
1477 among different histology subtypes. The protein expression matrix had been processed  
1478 as described in the “**Method**” section of the manuscript. 2536 proteins were finally  
1479 filtered out with less than 0.001 p-values. Then, we calculated the mean values of these  
1480 filtered proteins for each sarcoma histology subtype. The “Pearson” distances between  
1481 each two subtypes were calculated utilizing these mean values (**Supplementary Table**  
1482 **2**). Next, based on the “Pearson” distances, we created the dendrogram with “hclust”  
1483 and “fviz\_dend” functions in R using default parameters (**Figure RL11A**).

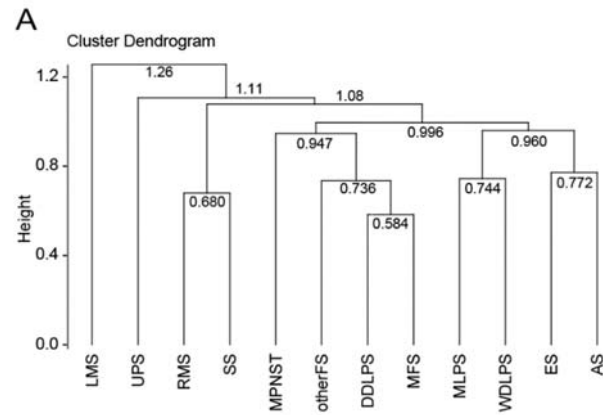

**Figure RL11. Process and details of hierarchical clustering**

(A) The cluster dendrogram of 12 histological subtypes of sarcoma

1484

1485

1486

## 1487 **2. The criteria to determine the cluster number**

1488 The cluster number of hierarchical clustering is determined by the height where the  
 1489 cluster dendrogram is cut. To find the appropriate cluster number (k), we cut the cluster  
 1490 dendrogram at different heights to get the cluster numbers from 2 to 10 (**Figure RL11B**).

1491 Referring to previous research, we utilized the silhouette coefficient to estimate the  
 1492 similarity of samples in one cluster and the difference of samples among different  
 1493 clusters. The silhouette coefficients reached the peak when the cluster number was 5 or  
 1494 6 (**Figure RL11C**).

1495

1496 To further investigate the clinical availability of our hierarchal cluster, we evaluated the  
 1497 association between hierarchal clustering with patients' prognosis. As a result, when the  
 1498 cluster number is 6, patients belonging to different clusters presented distinguished  
 1499 overall survival time (log-rank test,  $p < 0.03$ ) (**Figure RL11D**), suggesting its potential  
 1500 clinical utilization. Therefore, we cut the dendrogram at 0.95 and clustered the 12  
 1501 histological subtypes of sarcoma into 6 subgroups: HC1 (AS and ES), HC2 (MLPS and  
 1502 WDLPS), HC3 (MFS, DDLPS, and otherFS), HC4 (RMS and SS), HC5 (UPS), and  
 1503 HC6 (LMS) (**Figure RL11E**).

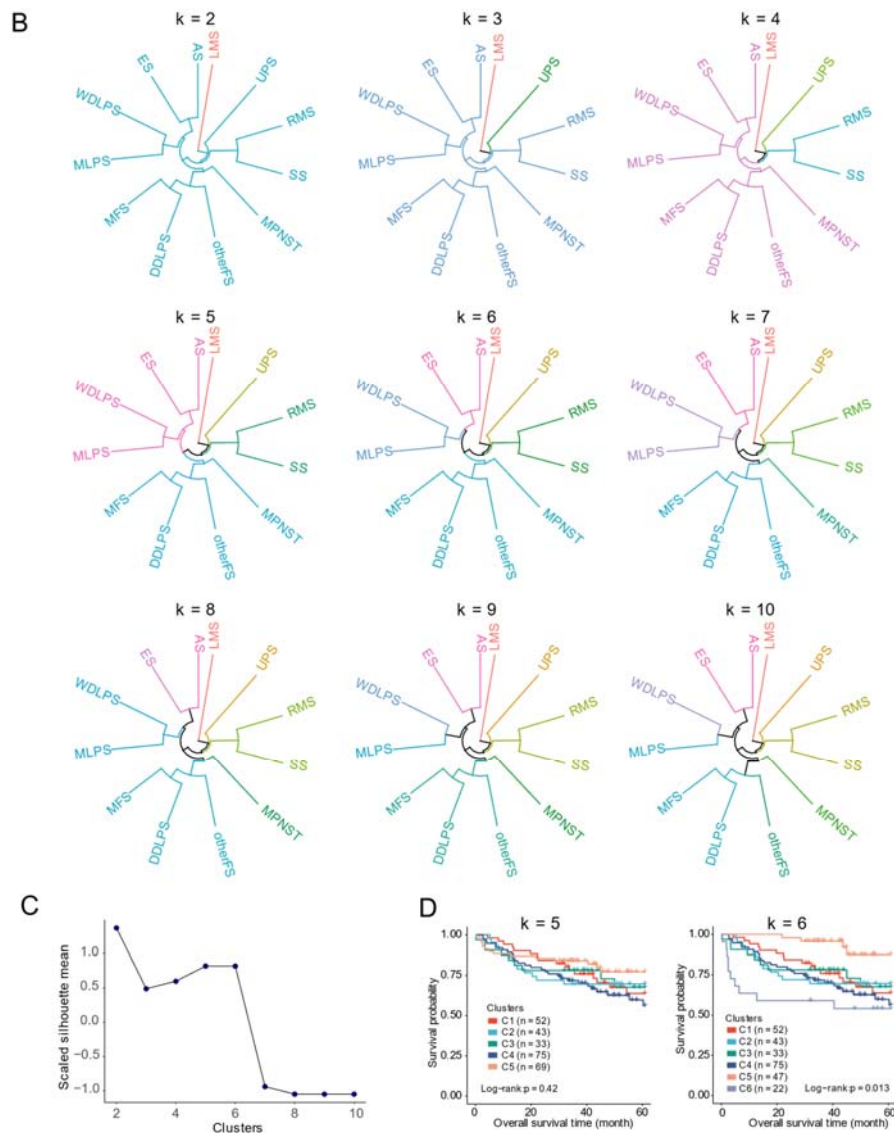

1504 **Figure RL11.** (B) The circled cluster dendrograms of sarcoma histological subtypes with  
 1505 cluster numbers from 2 to 10. (C) The scaled mean values of silhouette coefficients for different  
 1506 cluster numbers. (D) Kaplan-Meier curves for overall survival times when cluster number is 5  
 1507 or 6.  
 1508





1509 **Figure RL11.** (E) Cluster dendrogram for hierarchical clustering when cluster number is 6  
 1510

1511 **3. Biological insights based on hierarchical clusters**

1512 Besides clinical availability, our HC clustering showed strong biological relevance,  
 1513 each subgroup showed distinctive biological features, helping to uncover the intrinsic  
 1514 common features of different histological subtypes belonging to the same hierarchical  
 1515 cluster. Particularly, in our previous version, we found that HC1 contains AS and ES,  
 1516 both of which could be distinguished from other clusters with elevated expression of  
 1517 SHC1-TGF  $\beta$  signaling pathways.

1518  
 1519 In the revision, we conducted further analysis to investigate how hierarchical clusters  
 1520 could decipher the common features and heterogeneity among 12 histological subtypes  
 1521 of sarcoma. As a result, we found that our hierarchical clustering divided the lipid  
 1522 sarcoma (WDLPS, MLPS, and DDLPS) into two clusters. Particularly, DDLPS were  
 1523 clustered together with fibrosarcomas (MFS and otherFS) and MPNST in HC3.  
 1524 WDLPS and MLPS were clustered into another cluster (HC2). Considering different  
 1525 differentiation levels of WDLPS, MLPS, and DDLPS, these findings revealed the  
 1526 difference of tumor differentiation within lipid sarcomas might lead to the diverse  
 1527 molecular features between DDLPS and WDLPS, further implying that the degree of  
 1528 tumor differentiation might serve as an important factor in determining the molecular

1529 features of sarcomas within lipid sarcomas. Because DDLPS is more metastatic and  
 1530 proliferative than WDLPS (*Adv Anat Pathol*, PMID: 32960834), we compared the ratio  
 1531 of KI67-positive tumor cells in WDLPS and DDLPS. DDLPS showed an obviously  
 1532 higher ratio of KI67-positive tumor cells than WDLPS (**Figure RL11F**). Consistently,  
 1533 HC3 also presented the higher ratio of KI67-positive tumor cells than HC2, implying  
 1534 that HC3 featured fast cell proliferation characteristics (**Figure RL11F**).

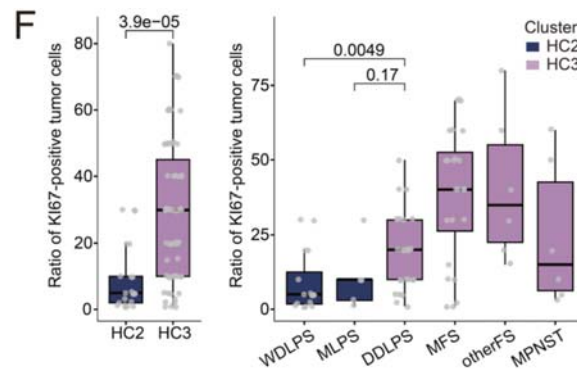

1535 **Figure RL11.** (F) Boxplots illustrating the ratio of KI67-positive tumor cells in HC2 and  
 1536 HC3 (left) and histological subtypes belonging to HC2/HC3 (right).

1537  
 1538 GSEA analysis revealed that DDLPS (HC3) could be distinguished from WDLPS and  
 1539 MLPS (HC2) by elevated enrichments of Rab pathway (**Figure RL11G-H**). The  
 1540 elevated protein expression of Rab GTPases including RAB14, RAB5A, RAB2A, etc.  
 1541 in HC3 confirmed the increased Rab pathway in HC3 (**Figure RL11I**).

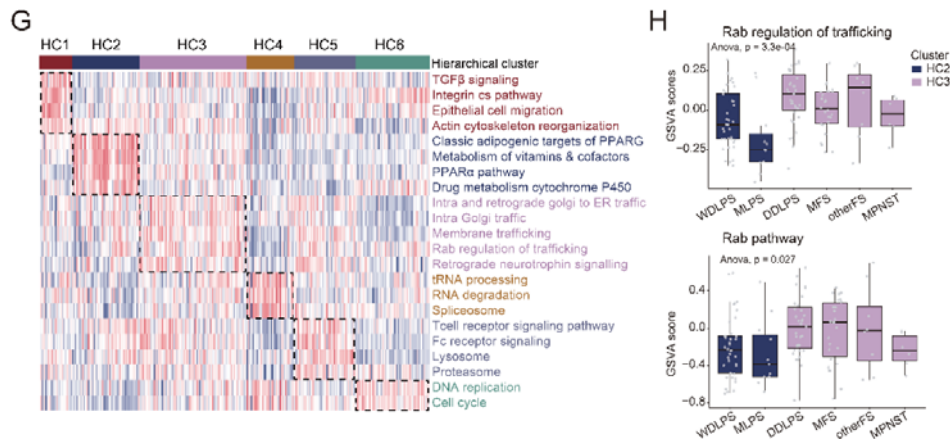

1542 **Figure RL11.** (G) The heatmap of specifically enriched pathways in hierarchical clusters; (H)  
 1543 Boxplots showing GSEA scores of Rab regulation of trafficking and Rab pathway in  
 1544 histological subtypes belonging to HC2/HC3.

1545

1546 Moreover, among the Rab GTPases that showed elevated expression in HC3, we  
1547 observed that the protein abundance of RAB2A and RAB14 were significantly  
1548 correlated with patients' prognosis (**Figure RL11J**).

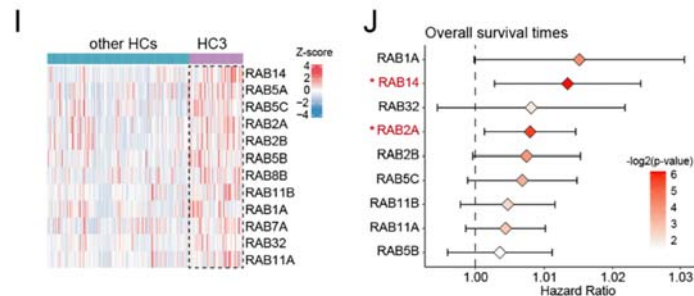

1549 **Figure RL11.** (I) The heatmap presenting Rab GTPases enriched in HC3; (J) The forest plot  
1550 showing the hazard ratios of Rab GTPases enriched in HC3.

1551

1552 Previous researches have reported that Rab GTPases participated in cell autophagy  
1553 (*Cell Death Differ*, PMID: 24440914; *Cell Biosci*, PMID: 33557950). RAB2A has  
1554 been proved to regulate the formation of autophagosome and autolysosome (*Autophagy*,  
1555 PMID: 30957628). Researches have indicated that the elevated autophagy might be  
1556 associated with tumor proliferation (*Clin Cancer Res*, PMID: 26567363), we then  
1557 hypothetically assumed that the elevated autophagy might lead to significantly fast  
1558 tumor cell proliferation and cell proliferation index in HC3.

1559

1560 Aim to confirm this assumption, we compared the autophagy pathway between HC2  
1561 and HC3, and found that both the autophagy pathway enrichment scores as well as  
1562 autophagy markers (ATG5, ATG7, MTOR, WIPI1) showed elevation in HC3 than HC2  
1563 (**Figure RL11K-M**). Moreover, proliferation index of sarcoma is both correlated with  
1564 protein expression of RAB2A and autophagy pathway GSVA scores (**Figure RL11N**).  
1565 These findings illustrated that comparing to WDLPS and MLPS which belong to HC3,  
1566 DDLPS, which belongs to HC2, showed fast tumor cell proliferation features, which  
1567 might be caused by the RAB2A-associated autophagy process.



1568 **Figure RL11.** (K) The scatter plot presenting the positive correlation between RAB2A and  
 1569 autophagy pathway; (L) Boxplots presenting the enrichment scores of autophagy in different  
 1570 clusters; (M) Boxplots presenting the abundances of autophagy markers in different clusters;  
 1571 (N) The scatter plot presenting the positive correlation between proliferation index and  
 1572 autophagy pathway (left) or abundance of RAB2A (right).

1573

1574 In sum, our hierarchical clustering showed clinical relevance and could help to illustrate  
 1575 the common features among different histological sarcomas and could further decipher  
 1576 the distinctive biological features of lipid sarcomas varies with degrees of  
 1577 differentiation. In the revised manuscript, we have updated the methods for hierarchical  
 1578 clustering in the “**Methods**” section and updated our analysis on the HC2 and HC3 in  
 1579 the “**Result**” section (line297-330). Also, we updated **Figure RL2** in the revised  
 1580 **Figure2, Supplementary Figure 8&9.**

1581

1582 **(5) line 250. A correlation between TGFbeta proteins and SHC1 does not**  
 1583 **necessarily mean that SHC1 plays a key role in TGFbeta signaling. It may suggest**  
 1584 **that it plays a role, but this needs more evidence. This should be re-worded.**

1585 **Response:**

1586 We appreciate the reviewer for this helpful suggestion. We apologize for the unclear  
 1587 description of the relationship between SHC1, TGFbeta protein, and the elevated cell  
 1588 migration features of HC1.

1589

1590 In our previous version, we grouped the 12 histological types of sarcomas into 6  
1591 hierarchical clusters (HC), among which HC1 containing both AS and ES showed the  
1592 worst prognosis. Differential expression analysis combined with GO pathway analysis  
1593 revealed HC1 featured with enrichment of the TGF $\beta$  signaling pathway. To further  
1594 elucidate the mechanism underlying the poor prognosis of HC1 patients, we focused on  
1595 the HC1 specifically elevated proteins that enriched in the TGF $\beta$  signaling pathway,  
1596 and identified SHC1 as the top-ranked HC1 elevated protein that associated with  
1597 patients' poor prognosis. As an adaptor protein, SHC1 has been reported to interact with  
1598 various ligands and activate downstream processes, including TGFbeta signaling  
1599 pathway (*EMBO J*, PMID: 17673906). We then performed correlation analysis and  
1600 observed positive correlation between SHC1 with both the expression of TGFB3 and  
1601 the GSVA scores of both TFGbeta signaling pathway and epithelial cell migration  
1602 pathway (Spearman's correlation, p-value < 0.05). For this reason, we then  
1603 hypothetically assumed that SHC1 might play an important role in leading the poor  
1604 prognosis of HC1 sarcoma, through cooperating with TGFB3 and promoting tumor cell  
1605 migration. In agreement with the reviewer's comment, more evidence could help to  
1606 elucidate the relationship among SHC1, TGFbeta and elevated tumor cell migrations of  
1607 HC1 cluster. In the revision, to illustrate the above relationships, we utilized ASM cell  
1608 line, the cell line of AS, to represent the HC1 cluster. We constructed the SHC1-  
1609 overexpressed vector and transfected it into the ASM cell line (SHC1-OE-ASM).  
1610 Meanwhile, we also utilized shRNA to knock down SHC1 (SHC1-KD-ASM). RT-PCR  
1611 analysis was utilized to verify the expression of SHC1 in SHC1-OE-ASM and SHC1-  
1612 KD-ASM. The results confirmed the significantly elevated expression of SHC1 in  
1613 SHC1-OE-ASM and significantly decreased expression of SHC1 in SHC1-KD-ASM  
1614 (**Figure RL12A**). We then evaluated the cell migration rates using transwell assay. As  
1615 a result, SHC1-OE-ASM showed increased cell migration ability, whereas SHC1-KD-  
1616 ASM exhibited decreased cell migration ability (**Figure RL12B**).

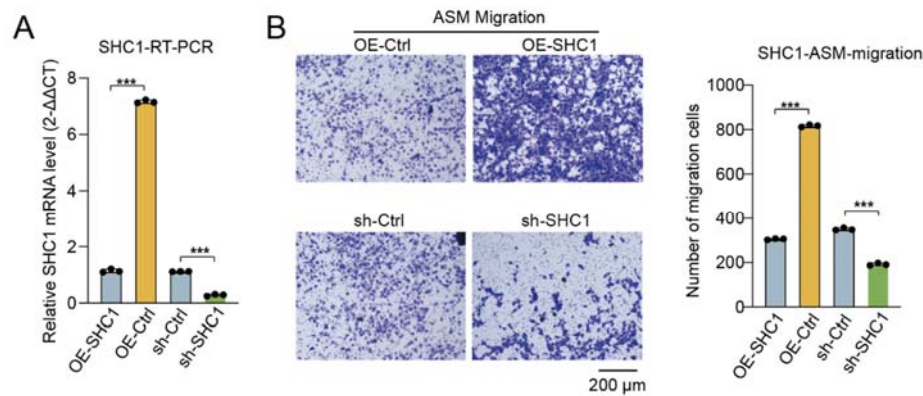

1617 **Figure RL12. Functional experiments to validate the role of SHC1 in the TGFbeta**  
 1618 **signaling pathway in sarcoma cell lines**

1619 (A) the expression of SHC1 in SHC1-OE-ASM, SHC1-KD-ASM and controlled cells by RT-  
 1620 PCR. (B) The Effects of SHC1 on the migration of ASM cells were confirmed by transwell  
 1621 assay. The bar plots indicated the migrated cell counts of ASM cells under different treatments.

1622

1623 We then treated SHC1-OE-ASM and OE-Ctrl-ASM with TGFB3 and evaluated the  
 1624 tumor cell migration rates. As a result, SHC1-OE-ASM treated with TGFB3 showed  
 1625 significantly elevated tumor cell migration rates, whereas OE-Ctrl-ASM showed no  
 1626 significantly changes in tumor cell migration rates by treating with TGFB3 (**Figure**  
 1627 **RL12C**). These results confirmed the role of TGFB3 in activating SHC1-mediated  
 1628 tumor cell migrations.

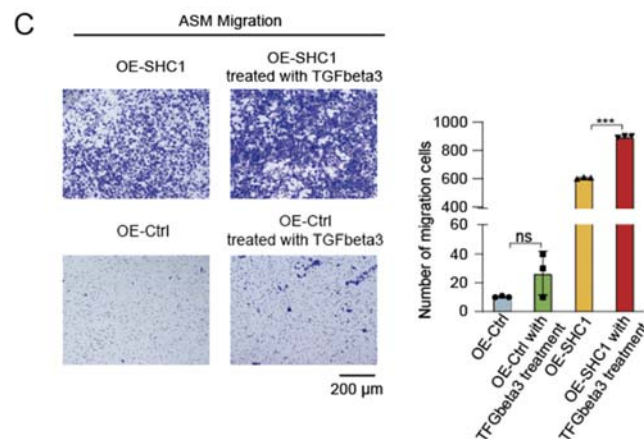

1629 **Figure RL12. (C) The effects of TGFB3 on the migration of ASM cells were confirmed by**  
 1630 **transwell assay. The bar plots indicated the migrated cell counts of ASM cells under different**

1631 treatments.

1632 In sum, our data illustrated the TGFB3 might participate in promoting tumor cell  
1633 migration through cooperating with SHC1. According to reviewer's comments, we also  
1634 toned down our statements as follows: "Consistently, we found a significantly positive  
1635 correlation between the protein abundance of SHC1 and the TGF $\beta$  signaling pathway  
1636 enrichment score (Pearson's correlation,  $r = 0.15$ ,  $p$ -value = 0.028), suggesting that  
1637 SHC1 might participate in the TGF $\beta$  signaling in sarcoma (Figure 2E). Among the  
1638 TGF $\beta$  families, TGFB3 showed a statistically positive correlation with SHC1  
1639 (Pearson's correlation,  $r = 0.25$ ,  $p$ -value = 0.026), suggesting the potential association  
1640 between TGFB3 and SHC1, and implying they might cooperate to impact downstream  
1641 signaling pathways (Figure 2E)". Besides above updates, we also added the results of  
1642 the functional experiments on lines 378-384.

1643

1644 **(6) Line 283: In sum, .... None of that is shown with enough evidence. The language**  
1645 **should be toned down. Higher kinase expression does not necessarily mean higher**  
1646 **kinase activity. Did ADD2 S2 phosphorylation level drop with inhibition of SHC1?**  
1647 **How specific is the inhibitor. What is the kinase phosphorylating ADD S2?**

1648 **Response:**

1649 Thanks again for the constructive suggestions. We apologized for the unclear  
1650 description on the relationship among SHC1, phosphorylation of ADD2 and tumor cell  
1651 migrations. In the revision, to decipher this relationship, we performed the following  
1652 analysis and functional experiments:

1653

1654 **1. Comparative and correlation analysis revealed PTK2 as the core kinase that**  
1655 **linked SHC1 and the phosphorylation of ADD2.**

1656 Published researches have indicated that SHC1 participated in various biological  
1657 process, and might regulate downstream pathways through phosphorylation (*Nature*,  
1658 PMID: 23846654; *Nat Commun*, PMID: 28276425; *Front Cell Dev Biol*, PMID:  
1659 33693003). Therefore, in our previous version, to further illustrate how SHC1 led to  
1660 cell migration, we performed correlation analysis and observed that the  
1661 phosphorylation of ADD2 (functions in cytoskeleton reorganization and epithelial

1662 migration) at Ser2 showed the most significantly correlation with SHC1. Combined  
1663 with clinical information, we found the phosphorylation of ADD2 at Ser2 was  
1664 significantly associated with patients' poor prognosis.

1665

1666 Functionally, SHC1 is an adapter protein that could interact with different kinases and  
1667 participated in signal transduction pathways (*Nature*, PMID: 23846654). In the revision,  
1668 to elucidate the kinase that related to SHC1 and might regulate the phosphorylation of  
1669 ADD2 at Ser2 in HC1, we referred to the public database (PhosphoSite [[https://](https://www.phosphosite.org/homeAction.action)  
1670 [www.phosphosite.org/homeAction.action](https://www.phosphosite.org/homeAction.action)], Phos-pho.ELM [[http://](http://phospho.elm.eu.org/dataset.html)  
1671 [phospho.elm.eu.org/dataset.html](http://phospho.elm.eu.org/dataset.html)], and PhosphoPOINT [[http://](http://kinase.bioinformatics.tw/)  
1672 [kinase.bioinformatics.tw/](http://kinase.bioinformatics.tw/)]) and conducted correlation analysis. As a result, among the  
1673 kinases reported to regulate phosphorylation of ADD2, PTK2 was identified as the  
1674 kinase that showed most significantly correlation with SHC1 and comparatively higher  
1675 expression in HC1 cluster (**FigurRL13A-B**).

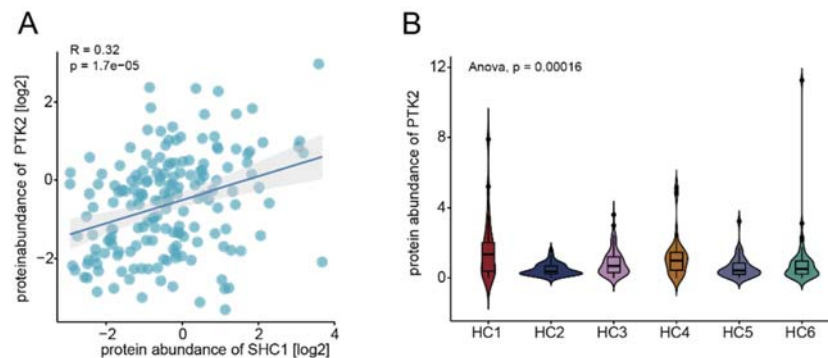

1676

**Figure RL13. SHC1 recruits PTK2 to phosphorylate ADD S2**

1677 (A) The Spearman-rank correlation of the expression of PTK2 with SHC1 expression  
1678 (Spearman's correlation). (B) The violin plot indicated the PTK protein expression among HC  
1679 clusters.

1680

## 1681 **1.2. Inhibiting PTK2 could impact the increased cell migration leading by SHC1.**

1682 To further investigate the role of PTK2 in impacting cell migration, SHC1-OE-ASM  
1683 and OE-Ctrl-ASM cell lines were used and were treated with PTK2 inhibitors. We then  
1684 evaluated the cell migration by transwell assay. As a result, inhibiting PTK2 could  
1685 significantly decreased the cell migration rates increased by SHC1 (**Figure RL13C-D**).



1686 Moreover, overexpression of PTK2 in SHC1-KD-ASM significantly increased cell  
 1687 migration which was inhibited by knocking down SHC1(**Figure RL13D**). These results  
 1688 implied that the kinase, PTK2, participated in cell migration driven by SHC1.

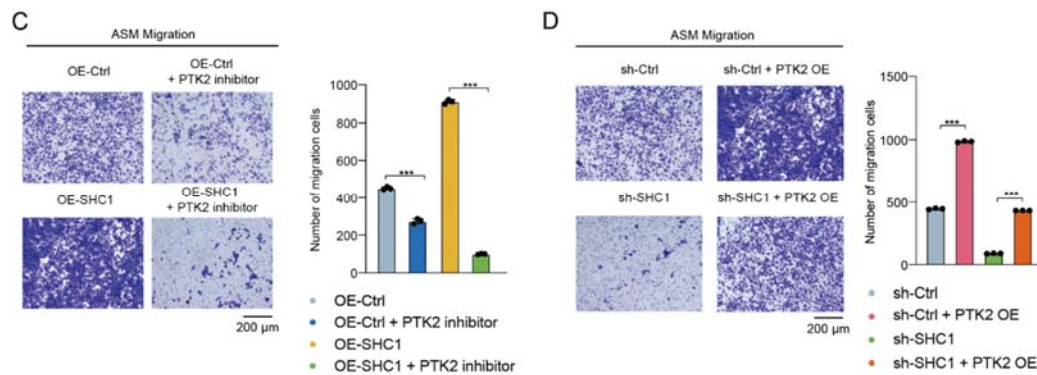

1689 **Figure RL13.** (C-D) The effects of SHC1-PTK2 axis on the migration of ASM cells were  
 1690 confirmed by transwell assay. The bar plots indicated the migrated cell counts of ASM cells  
 1691 under different treatments.

1692  
 1693 We further performed phosphoproteomic analysis between SHC1-OE-ASM treated  
 1694 with or without PTK2 inhibitor. As a result, the phosphorylation of proteins such as  
 1695 ADD2 Ser2, FGD4 Ser702 and EPB41 Ser542, which participate in actin cytoskeleton  
 1696 reorganization and epithelial cell migration, showed significantly elevation in SHC1-  
 1697 OE-ASM and significantly decreasing in SHC1-OE-ASM treated with PTK2 inhibitor  
 1698 (**Figure RL13E**). These observations confirmed the role of PTK2 in phosphorylating  
 1699 ADD2 at Ser2 and elevating actin cytoskeleton reorganization pathways.

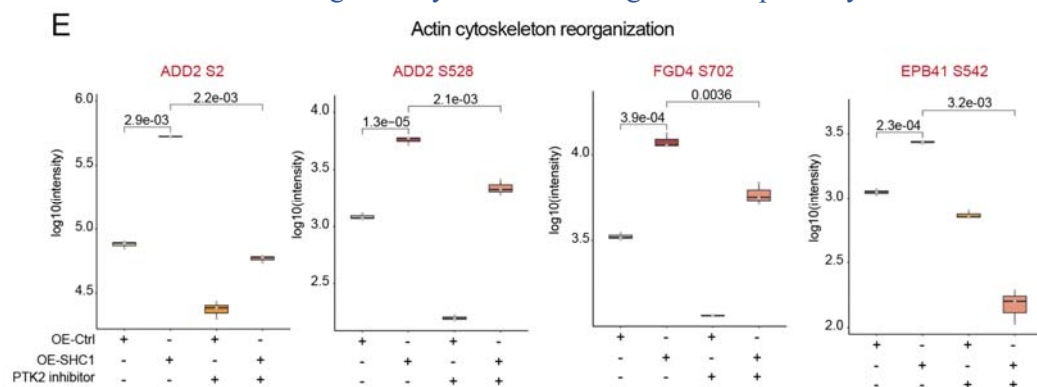

1700  
 1701 **Figure RL13.** (E) The boxplots indicating the phosphorylation intensity of ADD2 S2 and other  
 1702 phosphosites participating in actin cytoskeleton reorganization under different treatments.

1703

1704 In sum, our data illustrated the mechanism that by interacting with PTK2 and  
1705 phosphorylating ADD2 at Ser2, SHC1 will enhance the cell migration, and lead to poor  
1706 prognosis of HC1 patients. According to reviewer's comments, we also updated our  
1707 statements as following: "In sum, the upregulation of SHC1 might interact with kinase  
1708 PTK2, phosphorylating ADD2 at Ser2, enhanced cell migration. This phosphorylation  
1709 cascade might associate with the poor prognosis with HC1 patients (AS or ES)."

1710

1711 In the revision, we have updated **Figure RL3** in the revised **Supplementary Figure**  
1712 **10&11** and the "**Result**" section on lines297-334, line355-384, line 397-417, and line  
1713 520-551. in the revised manuscript.

1714

1715 **(7) Fig 3 and Supp Fig 6: Is the inhibition of SHC1 and MAPK10 affecting the**  
1716 **phosphorylation levels at CTNNB1Ser552 and Ser675?**

1717 **Response:**

1718 We appreciate the reviewer's comment and apologize for the not clearly illustrating the  
1719 mechanism how SHC1 and MAPK10 affect the phosphorylation levels at CTNNB1  
1720 Ser552 and Ser675. In the revision, to elucidate the mechanism, we conducted the  
1721 following analysis and functional experiments:

1722

1723 **1. Comparative and correlation analysis revealed CSNK1G1 as the core kinase**  
1724 **that linked SHC1 and the phosphorylation of CTNNB1 at Ser552.**

1725 As an adaptor protein, SHC1 has been reported to participate in various signaling  
1726 pathways. To illustrate the kinase that related to SHC1 and might regulate the  
1727 phosphorylation of CTNNB1 at Ser552 in Pc-Ra, we also referred to the public database  
1728 (PhosphoSite [[https:// www.phosphosite.org/homeAction.action](https://www.phosphosite.org/homeAction.action)], Phos-pho.ELM  
1729 [[http:// phospho.elm.eu.org/dataset.html](http://phospho.elm.eu.org/dataset.html)], and PhosphoPOINT [[http://](http://kinase.bioinformatics.tw/)  
1730 [kinase.bioinformatics.tw/](http://kinase.bioinformatics.tw/)]) and conducted correlation analysis. As a result, the among  
1731 the public reported kinases of CTNNB1, CSNK1G1 showed the significantly positive  
1732 correlation with both SHC1 and the phosphorylation of CTNNB1 at Ser55 (**Figure**  
1733 **RL14A-B**). Consistently, the phosphorylation of CSNK1G1 also showed elevated  
1734 expression level in PC-Ra (**Figure RL14C**).

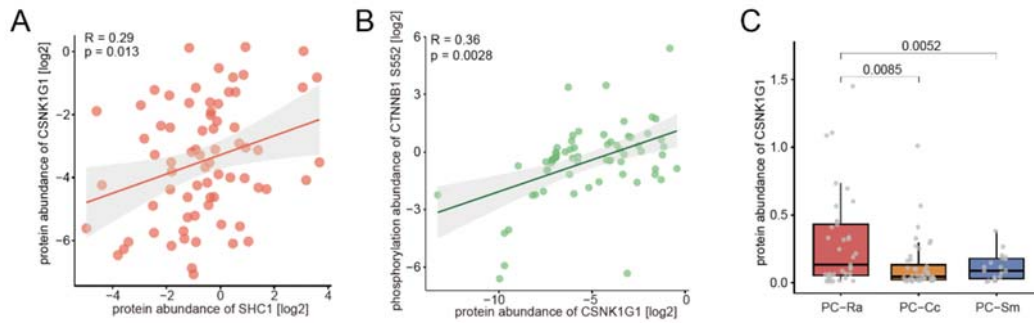

1735 **Figure RL14. phosphorylation levels of CTNNB1Ser552 and Ser675 are impacted by**  
 1736 **SHC1 and MAPK10 inhibitors.**

1737 (A)The scatter plot illustrates the positive correlation between CSNK1G1 and SHC1  
 1738 (Spearman’s correlation). (B) The scatter plot illustrates the positive correlation between  
 1739 CSNK1G1 and the phosphorylation level of CTNNB1 Ser552 (Spearman’s correlation).(C)  
 1740 The boxplot presents the expression of CSNK1G1 in different proteomic clusters.

1741

1742 **2. Phosphoproteomic analysis using SHC1-overexpressed cell line confirmed the**  
 1743 **role of CSNK1G1 in phosphorylating CTNNB1 at Ser552.**

1744 To further confirm the role of CSNK1G1 in phosphorylating CTNNB1, we constructed  
 1745 the SHC1-overexpressed vector and transfected it into the ISOHAS cell line (the cell  
 1746 line of AS) which showed similar expression patterns with PC-Ra-HC1. We then treated  
 1747 SHC1-OE-ISOHAS with or without the CSNK1G1 inhibitor and performed  
 1748 phosphoproteomic analysis. As a result, the phosphosites of proteins participating in  
 1749 angiogenesis, especially CTNNB1 Ser552, significantly decreased in SHC1-OE-  
 1750 ISOHAS treated with CSNK1G1 inhibitor (**Figure RL14D**). These observations  
 1751 confirmed the role of CSNK1G1 in phosphorylating CTNNB1 at Ser552. The above  
 1752 results confirmed our assumption that SHC1 could lead to PC-Ra-HC1 tumor migration  
 1753 through phosphorylating CTNNB1 mediated by CSNK1G1.

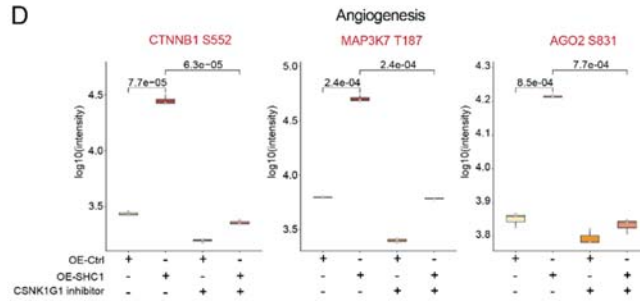

1754 **Figure RL14. (D)** The boxplots indicated the phosphorylation levels of CTNNB1 Ser552 and  
 1755 other phosphosites participating in angiogenesis under different treatments.

1756

1757 **3. Phosphoproteomic analysis using MAPK10-overexpressed cell line confirmed**  
 1758 **the role of MAPK10 in phosphorylating CTNNB1 at Ser675.**

1759 As for the impact of MAPK10 on the phosphorylation of CTNNB1 at Ser675. We  
 1760 constructed the MAPK10 overexpressed vector and transfected it into SW872 cell line  
 1761 (MAPK10-OE-SW872) which showed similar expression patterns with PC-Ra-oHCs.  
 1762 We then treated MAPK10-OE-SW872 cells and treated with or without MAPK10  
 1763 inhibitor. We also conducted phosphoproteomic analysis, and observed the  
 1764 phosphorylation of proteins such MAPK13, CTNNB1 and MAPK14 which participate  
 1765 in MAPK signaling pathway, showed significantly elevated expression in MAPK10  
 1766 overexpressed cells and downregulated in MAPK10 inhibitor treated cell lines (**Figure**  
 1767 **RL14E**). The above results confirmed our assumption that MAPK10 could lead to PC-  
 1768 Ra-oHCs tumor migration through phosphorylating CTNNB1 at Ser675.

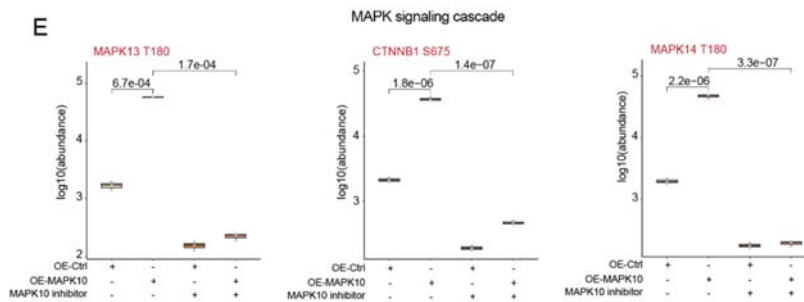

1769 **Figure RL14. (E)** The boxplots indicated the phosphorylation levels of CTNNB1 Ser675 and  
 1770 other phosphosites participating in MAPK signaling cascade under different treatments.

1771

1772 In the revision, we have updated the relationship among SHC1-PTK2-phosphorylated  
 1773 CTNNB1 at Ser552, and the relationship among MAPK10-phosphorylated CTNNB1

1774 at Ser675 on lines 520-551 of the “**Result**” section. We also updated the **Figure RL14**  
1775 into **Supplementary Figure 11** of the revised manuscripts, respectively.

1776

1777 **(8) Fig 7P and line 457. There is lots of evidence missing for RIOK1**  
1778 **phosphorylating NPM1 and thereby regulating the interaction of APEX1 and**  
1779 **NPM1. Does inhibition/KD of the kinase affect the phosphorylation level**  
1780 **(phosphoproteomics, WB)? Does the inhibition affect the interaction of the 2**  
1781 **proteins (IP-MS, WB)? Does it affect the co-regulation of the two proteins**  
1782 **(proteomics)?**

1783 **Response:**

1784 We appreciate the reviewer for this critical suggestion and agree with that more  
1785 evidence should be provided to verify our findings on the RIOK1-phosphorylated-  
1786 NPM1-APEX1 axis in promoting tumor cell proliferations. According to the reviewer’s  
1787 suggestion, in the revision, we performed further analysis and functional experiments  
1788 to confirm our findings.

1789

1790 Specifically, we utilize the sarcoma cell line, RKN, for further functional experiments,  
1791 as it originates from LMS and represents the proteomic features of PC-Cc. We  
1792 constructed the RIOK1-overexpressed RKN cell line (RIOK1-OE-RKN) through the  
1793 RIOK1 overexpression plasmid, pCDH-RIOK1-copGFP. Moreover, shRNA of RIOK1  
1794 were designed and transfected into RKN cell line to knock down the expression of  
1795 RIOK1 (RIOK1-KD-RKN). We then performed CCK8 cell proliferation assay and  
1796 evaluated the cell proliferation rates. As a result, RIOK1-OE-RKN showed most  
1797 significantly elevated cell proliferation rates and RIOK1-KD-RKN had significantly  
1798 decreased cell proliferation rates (**Figure RL15A**). We also treated RIOK1-OE-RKN  
1799 cell line with RIOK1 inhibitor, and the inhibitor significantly decreased the  
1800 proliferation of RIOK1-OE-RKN (**Figure RL15A**). These observations confirmed the  
1801 impact of RIOK1 on promoting sarcoma tumor cell proliferation. We then performed  
1802 comparative proteomic and phosphoproteomic analysis among RKN sarcoma cell lines  
1803 with different treatments (RKN transfected with empty vector, RIOK1-OE-RKN,  
1804 RIOK1-OE-RKN treated with RIOK1 inhibitor, RKN transfected with scrambled

1805 shRNA, RIOK1-KD-RKN). As a result, besides APEX1, the proteins participating in  
 1806 DNA base excision repair including XRCC1, XRCC4, POLB, as well as cell  
 1807 proliferation index KI67 showed elevated expression in RIOK1-OE-RKN (**Figure**  
 1808 **RL15B-C**). Intriguingly, the phosphorylation of NPM1 at Ser 125 was significantly  
 1809 increased in RIOK1-OE-RKN, implying that RIOK1 regulated the phosphorylation of  
 1810 NPM1 (**Figure RL15C**).

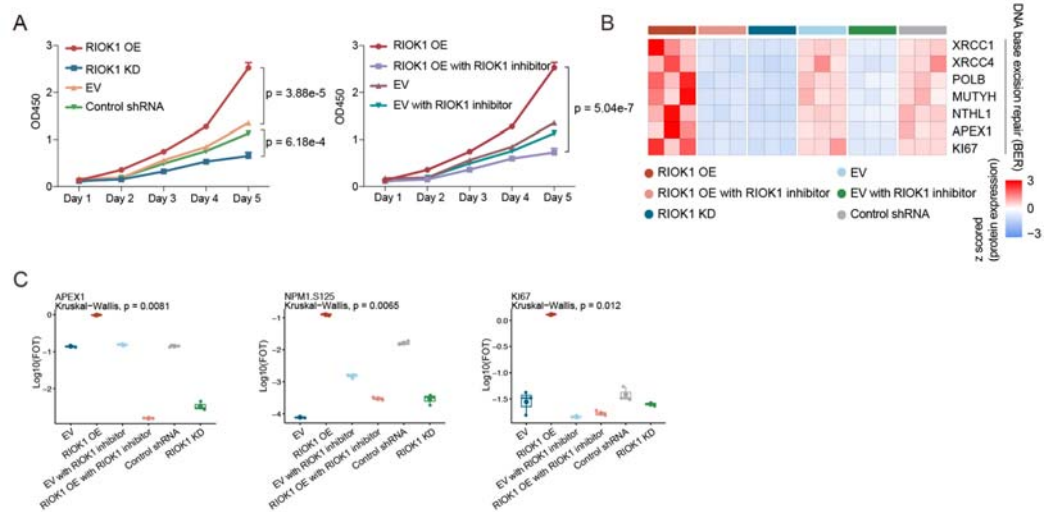

1811 **Figure RL15. Functional experiments to validate the role of RIOK1 in phosphorylating**  
 1812 **NPM1 and interaction of NPM1 and APEX1**

1813 (A) Proliferation of the RKN cell line associated with different treatments (n = 4 repeats per  
 1814 group). (B) The heatmap reveals the expression patterns of DNA base excision proteins across  
 1815 the cells associated with various treatment (n = 3 repeats per group). (C) The boxplots reveal  
 1816 the abundance of APEX1, KI67 and phosphorylation of NPM1 at Ser125 in RKN cell line with  
 1817 different treatments.

1818

1819 To further investigate the impact of NPM1 phosphorylation on cell proliferation as well  
 1820 as on its interaction with APEX1, we then constructed NPM1 phosphorylation site  
 1821 mutant plasmid, NPM1<sup>S125A</sup>, and transfected it into RIOK1-KD-RKN cells (NPM1-  
 1822 mut-OE-RIOK1-KD-RKN). The non-mutant NPM1 was also transfected into RIOK1-  
 1823 KD-RKN cells (NPM1-OE-RIOK1-KD-RKN) which were utilized as controls. By  
 1824 evaluating the cell proliferation rates, we observed that comparing to RIOK1-KD-RKN  
 1825 cells, NPM1-OE-RIOK1-KD-RKN cells should elevated cell proliferation rates,

1826 whereas the cell proliferation rates of NPM1-mut-OE-RIOK1-KD-RKN showed no  
 1827 significant elevation (**Figure RL15D**). These results indicated the decreased cell  
 1828 proliferation rates led by knocking down RIOK1 could only be rescued by the wild type  
 1829 NPM1 overexpression, which further emphasized the role of phosphorylation of NPM1  
 1830 in mediating RIOK-dependent regulation of the tumor cell proliferation.

1831

1832 To further illustrate whether the phosphorylation of NPM1 affected its interaction with  
 1833 APEX1, we performed IP-MS using both NPM1-mut-OE-RIOK1-KD-RKN and  
 1834 NPM1-OE-RIOK1-KD-RKN (**Figure RL15F**). As a result, 17 proteins were identified  
 1835 to interact with the wild type NPM1, but not NPM1<sup>S125A</sup>. Among them, NPM1  
 1836 presented the highest abundance, proving that NPM1 Ser125 is the pivotal site for the  
 1837 interaction between NPM1 and APEX1 (**Figure RL15G-H**). The above results  
 1838 illustrated the potential mechanism that RIOK1 could impact sarcoma tumor cell  
 1839 proliferation through phosphorylating NPM1 which then interacted with APEX1 and  
 1840 promoted tumor cell proliferation accordingly.

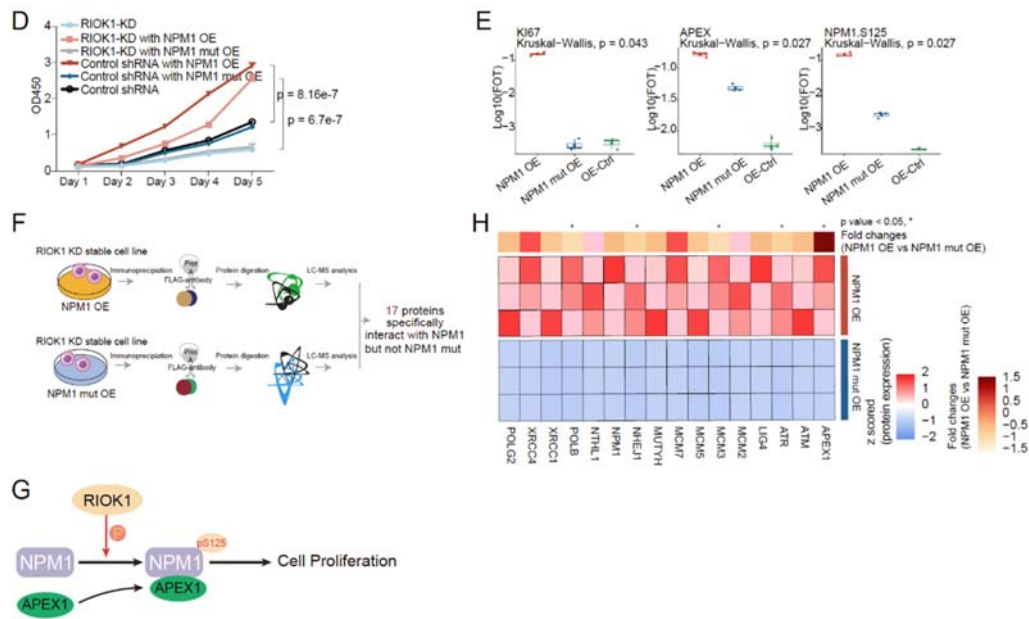

1841 **Figure RL15.** (D) Proliferation of the RKN cell line associated with various treatments (n = 4).  
 1842 (E) The boxplots present the expression of KI67, APEX1 and phosphorylation of NPM1 among  
 1843 NPM1-OE-RIOK1-KD-RKN, NPM1-mut-OE-RIOK1-KD-RKN, and EV-RIOK1-KD-RKN.  
 1844 (F) The schematic work flow of the IP-MS experiment for the NPM1. (G) The diagram  
 1845 illustrates the mechanism underlying cell proliferation of PC-Cc driven by NPM1 and APEX1.

1846 (H) The heatmap reveals the expression patterns of DNA base excision proteins across the  
1847 NPM1-OE-RIOK1-KD-RKN, NPM1-mut-OE-RIOK1-KD-RKN (n = 3 repeats per group).

1848

1849 In the revision, we have added **Figure RL15** in **Supplementary Figure 12**, and  
1850 updated our description on the role of RIOK1-phosphorylated-NPM1-APEX1 axis in  
1851 promoting tumor cell proliferations in PC-Cc, with more evidence (both from  
1852 functional experiments and bioinformatic analysis). Please see the lines 631-669 in the  
1853 “**Results**” section of the revised manuscript.

1854

1855 **(9) Fig 7O and line 527: Evidence is missing. Does inhibition/KD of MAPK10 affect**  
1856 **the CTNNB1 Ser657 phosphorylation level. Does the inhibition of MAPK10 in**  
1857 **cells derived from the according strain affect immune infiltration (xenograft**  
1858 **model)?**

1859 **Response:**

1860 We sincerely thank the reviewer for the comment. To comprehensive respond to the  
1861 comment, we divided the response into two parts.

1862

1863 **1. The impact of MAPK10 on phosphorylation of CTNNB1 at Ser657**

1864 As we responded to Q7-part3, indeed, by both knocking down the expression of  
1865 MAPK10 or inhibiting its kinase activity could significantly decrease the  
1866 phosphorylation of CTNNB1 at Ser657. Please see the response for Q7 for details.

1867

1868 **2. The impact of MAPK10 on tumor immune infiltrations (xenograft model).**

1869 According to the reviewer’s suggestion, we further validated the impact of MAPK10  
1870 on tumor immune infiltration using C57/BL6J mice, which usually used as the model  
1871 for immune microenvironment analysis (*Nature Reviews Cancer*, PMID: 27687979;  
1872 *Cell Reports*, PMID: 35732118; *Clin Cancer Res*, PMID: 15709162). We constructed  
1873 xenograft mice models using SW872 cells in which MAPK10 were stably  
1874 overexpressed or knocked down. Twenty C57/BL6J mice were randomized into four  
1875 groups (n = 5 each), and separately injected MAPK10 overexpressed and MAPK10  
1876 knocked down SW872 cell lines (OE-MAPK10 and sh-MAPK10) and control cell lines



1877 (OE-Ctrl and sh-Ctrl) to form subcutaneous tumors. Tumor size and weight were  
 1878 measured throughout the tumor growth process and tumor volume was calculated. After  
 1879 4 weeks, mice were sacrificed and tumors were collected for further proteomic and IHC  
 1880 staining analysis. As a result, tumors from mice transplanted with OE-MAPK10-  
 1881 SW872 showed significantly increased immune cell infiltrations, which were evidenced  
 1882 by elevated expression of T cell and macrophage markers (CD4, CD8 and CD163).  
 1883 Moreover, the immune checkpoint proteins such as CD274 (PD-L1) and CD80 were  
 1884 also observed to be elevated in OE-MAPK10-SW872 mice (**Figure RL16A**). On the  
 1885 contrary, mice which were transplanted with sh-MAPK10-SW872 showed obviously  
 1886 decreased immune cell infiltrations, with decreased expression of both immune cell  
 1887 markers as well as immune checkpoint proteins (**Figure RL16A**).

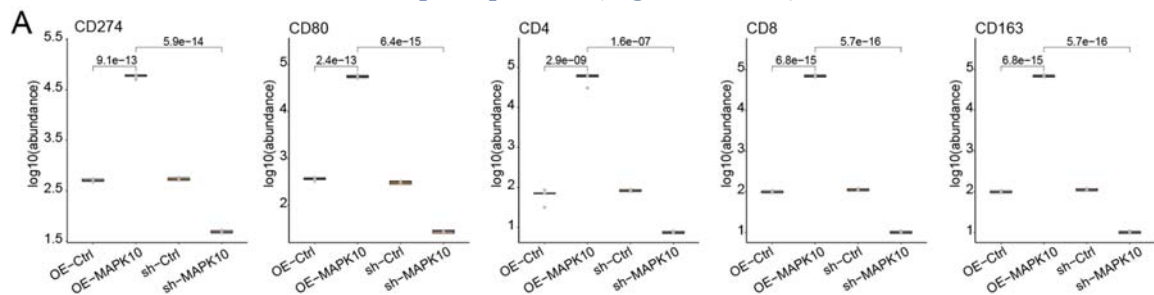

1888 **Figure RL16. The impact of MAPK10 on immune infiltration in mouse xenograft model.**

1889 (A) Boxplots illustrate the expressions of immune cell markers, including CD274, CD80, CD4,  
 1890 and CD8 in differently treated mouse xenograft models.

1891

1892 IHC staining further confirmed the increased immune cell infiltrations in OE-  
 1893 MAPK10-SW872 mice and decreased immune cell infiltrations in sh-MAPK10-  
 1894 SW872 mice (**Figure RL16B**).

1895

1896 We updated the above results about the impact of MAPK10 on immune infiltration from  
 1897 line 753 to line 772 of the ‘**Result**’ section.

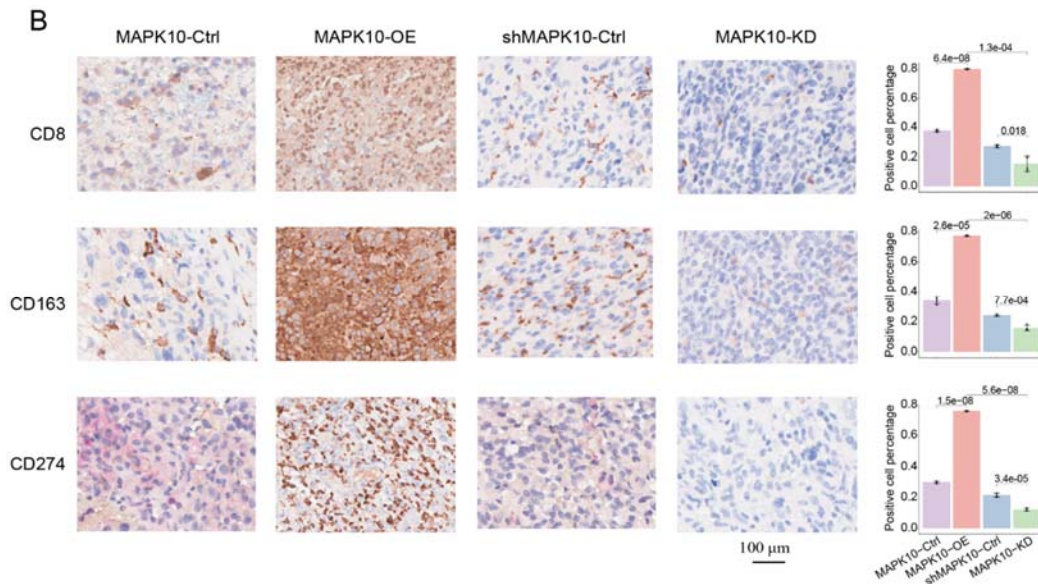

1898 **Figure RL16.** (B) IHC images illustrate the expression of CD8, CD163, and CD274 in  
 1899 subcutaneous tumors of the C57/BL6J mice transplanted with SW872 sarcoma cell lines.  
 1900 Positive cell percentage is presented on the right.

1901

1902 **(10) As the control samples are matched tumor-adjacent tissue, the authors may**  
 1903 **consider comparing sarcoma and control tissue in a patient-specific manner to**  
 1904 **better understand tumor/normal differences (does it matter if I normalize the**  
 1905 **sarcoma proteome by the adjacent tissue proteome for each patient, rather than**  
 1906 **compare all control samples with all sarcoma samples?).**

1907 **Response:**

1908 We appreciate the reviewer's constructive comments. In our previous version, to  
 1909 present the features of tumors and NATs, we performed comparative analysis between  
 1910 all tumors and all NATs. The results illustrated that proteins elevated in tumor tissues  
 1911 majorly enriched in biological pathways such as cell growth, RNA splicing, and antigen  
 1912 processing and presentation. On the other hand, proteins dominantly expressed in NATs  
 1913 were enriched in ATP metabolic process, glycolytic process, and muscle system process.

1914

1915 To address the reviewer's comments, in the revision, we conducted further tumor and  
 1916 NAT comparative analysis, by normalizing the sarcoma proteome using the adjacent  
 1917 tissue proteome for each patient. As a result, the GO features of tumors and NATs  
 1918 basically remained unchanged comparing to our previously portrayed molecular

1919 features of all tumors and all NATs. Specifically, in concordant with our previous results,  
 1920 the GO enrichment analysis revealed that sarcoma tumors were also featured with  
 1921 biological pathways such as cell cycle, synthesis of DNA, MYC targets up, signaling  
 1922 by interleukins, and antigen processing and presentation (**Figure RL17A**). Meanwhile,  
 1923 the muscle system process, actin filament organization, and TCA cycle we observed to  
 1924 be enriched by proteins elevated in the NATs (**Figure RL17A**). These results illustrated  
 1925 that the distinctive biology pathways between tumors and NATs is stable and largely  
 1926 unaffected by comparison methods.

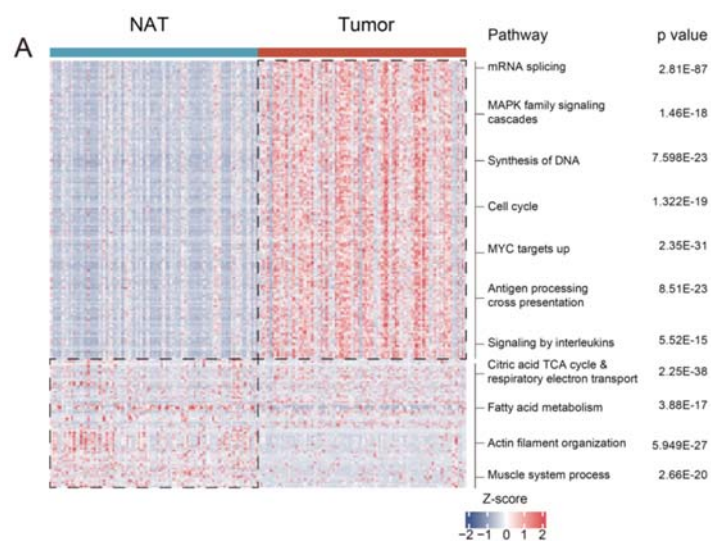

1927 **Figure RL17. Pairwise comparison between NAT and tumor of sarcoma**

1928 (A) The heatmap presents the significant difference of enriched pathways between tumors and  
 1929 NATs through the pairwise comparison.

1930  
 1931 Moreover, we also compared the difference of biology pathways among histological  
 1932 subtypes of sarcoma utilizing the tumors' proteome which was normalized by paired  
 1933 NAT samples. Compared with our previous result, the histological specific features of  
 1934 sarcomas basically remained unchanged (**Figure RL17B-C**). For instance, TGF  $\beta$   
 1935 signaling and p53 pathway were dominantly enriched in AS, myogenesis were observed  
 1936 to be elevated in LMS, and MYC target pathway was significantly enriched in SS&UPS  
 1937 (**Figure RL17B**), etc. The above results confirmed that the distinctive biological  
 1938 features of diverse histological subtypes of sarcoma remain the same despite whether  
 1939 being normalized by paired NAT samples.

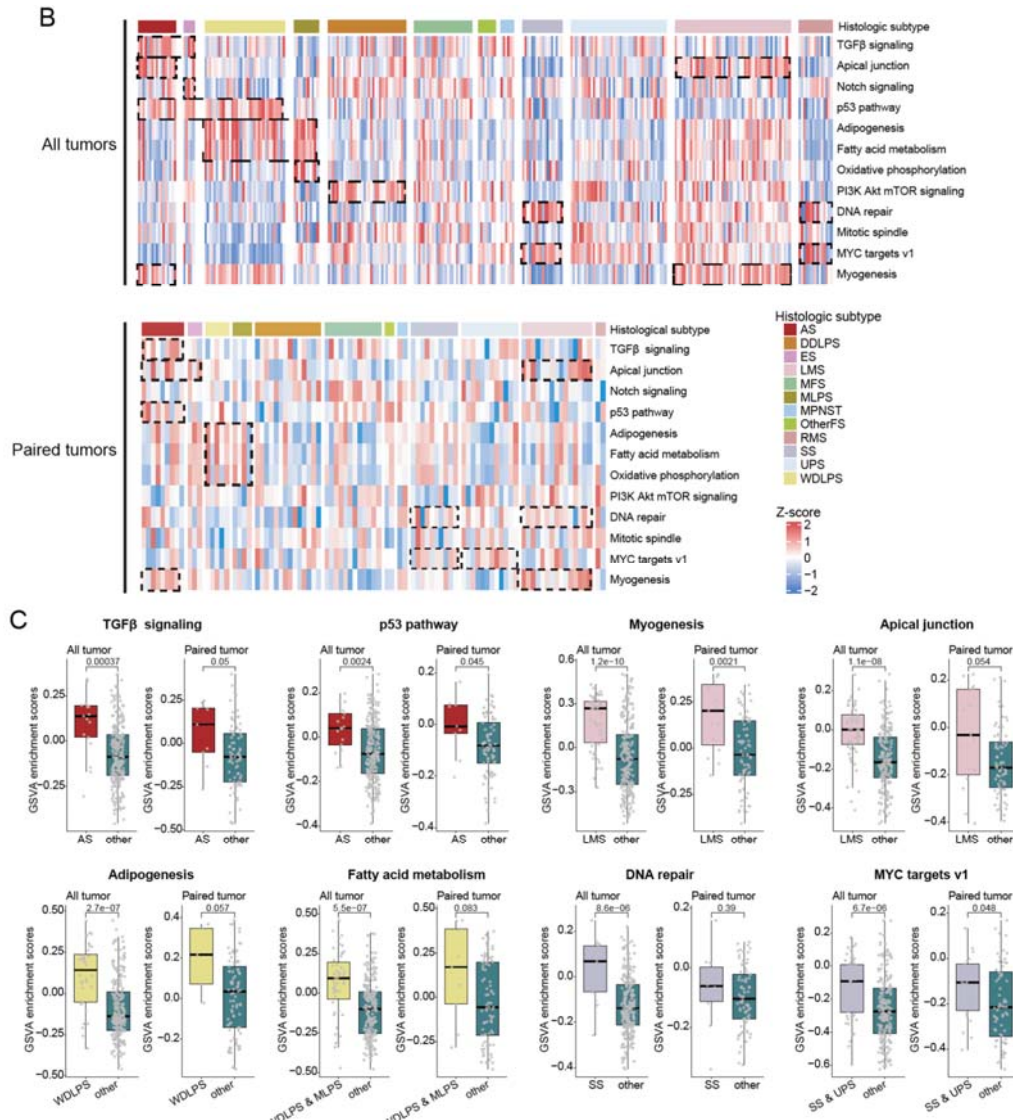

1940 **Figure RL17.** (B) Heatmaps illustrates enriched cancer hallmarks in STS histologic subtypes  
 1941 through non-pairwise (top) and pairwise (down) methods. (C) Boxplots presents the enriched  
 1942 pathways in specific histological subtypes processed through non-pairwise or pairwise method.  
 1943  
 1944 Based on the above results, in the revision, following reviewer’s suggestion, besides  
 1945 our original results about the comparison of NATs and tumors, we also added the results  
 1946 of paired comparison between tumor and NAT in **Supplementary Figure 4**. Moreover,  
 1947 we also added sarcomas’ histological specific features that were also normalized by  
 1948 their paired NATs in the **Supplementary Figure 5**. Please see lines 197-199 and lines  
 1949 241-244 in the revised manuscript.

## REVIEWERS' COMMENTS

### Reviewer #1 (Remarks to the Author):

The authors have addressed all my questions and provided a detailed explanation on how each question was addressed.

### Reviewer #2 (Remarks to the Author):

The authors appropriately discussed or answered to comments raised during the review process.

### Reviewer #3 (Remarks to the Author):

The authors carefully addressed all my suggestions and comments and did several follow-up experiments to confirm hypotheses they have stated in the original experiment. I think the paper is suitable for publications if the below comments/suggestions are addressed.

(i) I think it is wrong to state that 15 k plus proteins were identified across all datasets based on the results of filtering each run individually and then combine the protein lists. As the 10 k protein received from the combined dataset protein filtering shows, the FDR of the identified 15 k proteins is about 33 %. I suggest just reporting the 10 k proteins (or mentioning the estimated FDR for the 15 k proteins).

(ii) The authors made follow-up experiments on all my comments and were able to confirm all hypotheses stated in the original manuscript. This is quite some work and impressive. The hypotheses included identifying the phosphorylation at ADD2 Ser2, the effect of SHC1 and MAPK10 inhibition on CTNNB1 Ser552 and Ser 675, and the regulation of NPM1/APEX1 binding through RIOK1 catalyzed phosphorylation of NPM1. The authors should provide the entire proteome and phospho datasets from this experiments as supplemental tables and upload the RAW files to the repository.

### Comments not affecting my recommendation on publishing:

(a) a median 30 % CV is quite high for technical replicates. The authors only show S/N to CV correlation at the protein level. What I recommend is to look at this relationship at the peptide level, as this may

readily allow to filter out low S/N peptides with poor CVs without affecting the protein counts too much. I don't think the message in this manuscript will be hugely affected when applying this filter (and I am not requesting this), but in general, I would recommend trying to improve CV by some S/N filtering.

(b) How were the numbers in Table RL6 generated? I did not look at every paper, but a median CV of 0.99 for a TMT dataset produced by Steve Carr seems completely off (PMID: 33212010). What we should consider is the median CVs of technical replicates (not across all samples analyzed in a study, this would rather be sample-dependent than method-dependent). For TMT this should be in the 0.05-0.1 range. I could not find any data in the Carr paper. This is not relevant to the reviewed manuscript, but the table seems to be off.

Reviewer #3 (Remarks to the Author):

The authors carefully addressed all my suggestions and comments and did several follow-up experiments to confirm the hypotheses they stated in the original experiment. I think the paper is suitable for publication if the below comments/suggestions are addressed.

**Response:**

We sincerely appreciate the constructive comments that the reviewer has provided, which truly help us in improving our work. We have revised the manuscript and provided specific point-to-point responses as follows:

Q1. I think it is wrong to state that 15 k plus proteins were identified across all datasets based on the results of filtering each run individually and then combining the protein lists. As the 10 k protein received from the combined dataset protein filtering shows, the FDR of the identified 15 k proteins is about 33 %. I suggest just reporting the 10 k proteins (or mentioning the estimated FDR for the 15 k proteins).

**Response:**

We are grateful for the constructive comment that the reviewer has provided. According to the reviewer's comment, we have removed the statement that 15k plus proteins were identified across all datasets, and revised the description as follows: "Quality control was applied on both peptide and protein level with less than 1%FDR. As a result, 10,118 proteins and 37,842 phosphosites were identified, with 5,593 proteins and 6,483 phosphosites per sample on average." Please see lines 154-157 in the result section of the revised manuscript.

Q2. The authors made follow-up experiments on all my comments and were able to confirm all hypotheses stated in the original manuscript. This is quite some work and impressive. The hypotheses included identifying the phosphorylation at ADD2 Ser2, the effect of SHC1 and MAPK10 inhibition on CTNNB1 Ser552 and Ser 675, and the regulation of NPM1/APEX1 binding through RIOK1 catalyzed phosphorylation of

NPM1. The authors should provide the entire proteome and phosphor datasets from these experiments as supplemental tables and upload the RAW files to the repository.

**Response:**

We appreciate the reviewer's comments. We have now deposited all the RAW files of the entire proteome and phosphor datasets to the iProX (<https://www.iprox.org/>). Specifically, all the proteome and phosphoproteome datasets for the cohort study can be accessed with the ProteomeXchange ID: PXD047297. For functional studies, all the raw data can be accessed with the iProX accession: IPX000764500, with the following url: <https://www.iprox.cn/page/PSV023.html?url=1701407935333pK2j>, and password: BbZF. The entire proteome and phosphoproteome datasets from these experiments were uploaded to OMIX and can be accessed with the accession no OMIX005327. Moreover, we provide source data for all data presented in graphs within the Figures. For details, please see the Data Availability section in the revised manuscript and the Source data.

Comments not affecting my recommendation on publishing:

Q1. A median of 30 % CV is quite high for technical replicates. The authors only show S/N to CV correlation at the protein level. What I recommend is to look at this relationship at the peptide level, as this may readily allow to filter out low S/N peptides with poor CVs without affecting the protein counts too much. I don't think the message in this manuscript will be hugely affected when applying this filter (and I am not requesting this), but in general, I would recommend trying to improve the CV by some S/N filtering.

**Response:**

We thank the reviewer for the constructive suggestion. Taking the reviewer's suggestion, we have calculated the S/N to CV correlation at the peptide level. As a result, the median CV calculated based on S/N ratios at the peptide level was 0.25 and the mean CV was 0.32. The result is comparable with the CV at the protein level (**Figure RL1A-B**). In agreement with the reviewer, the median CV is a bit high for technical replicates. Thus, to improve the CV for technical replicates, we took the reviewer's suggestion and filtered out low S/N peptides with poor CVs (peptides with



CV > 0.30). As a result, the median CV at peptide level was decreased to 0.18 (**Figure RL1C**). Moreover, after filtering out peptides with low CV, we then evaluated the number of proteins and calculated the CV at the protein level. As a result, the number of proteins was 7,229 (7,564 before peptide filtering) which was not affected too much by the filtering process (**Figure RL1D**). Meanwhile, the median CV, at the protein level, was significantly decreased to 0.14 (0.30 before peptide filtering) (**Figure RL1E**). These results indicated the peptide-filtering process significantly decreased the variability across the technical repeats at both peptide and protein levels, without affecting protein counts. In the revision, we revised our statement about the CVs across the technique repeats as follows: “The correlations of these control samples were 0.83-0.95 and the median coefficient of variation (CV) was 0.14 (**Methods, Supplementary Figure 1A-C**), which is comparable to previously published papers (*Nature Medicine*, **PMID: 35654907**), presenting the stability of the mass spectrometry across quality controls.”, and added description about the S/N filtering process in the **Methods** section. Please see lines 164–167 in the result section, and lines 1122–1127 in the **Methods** section for details.

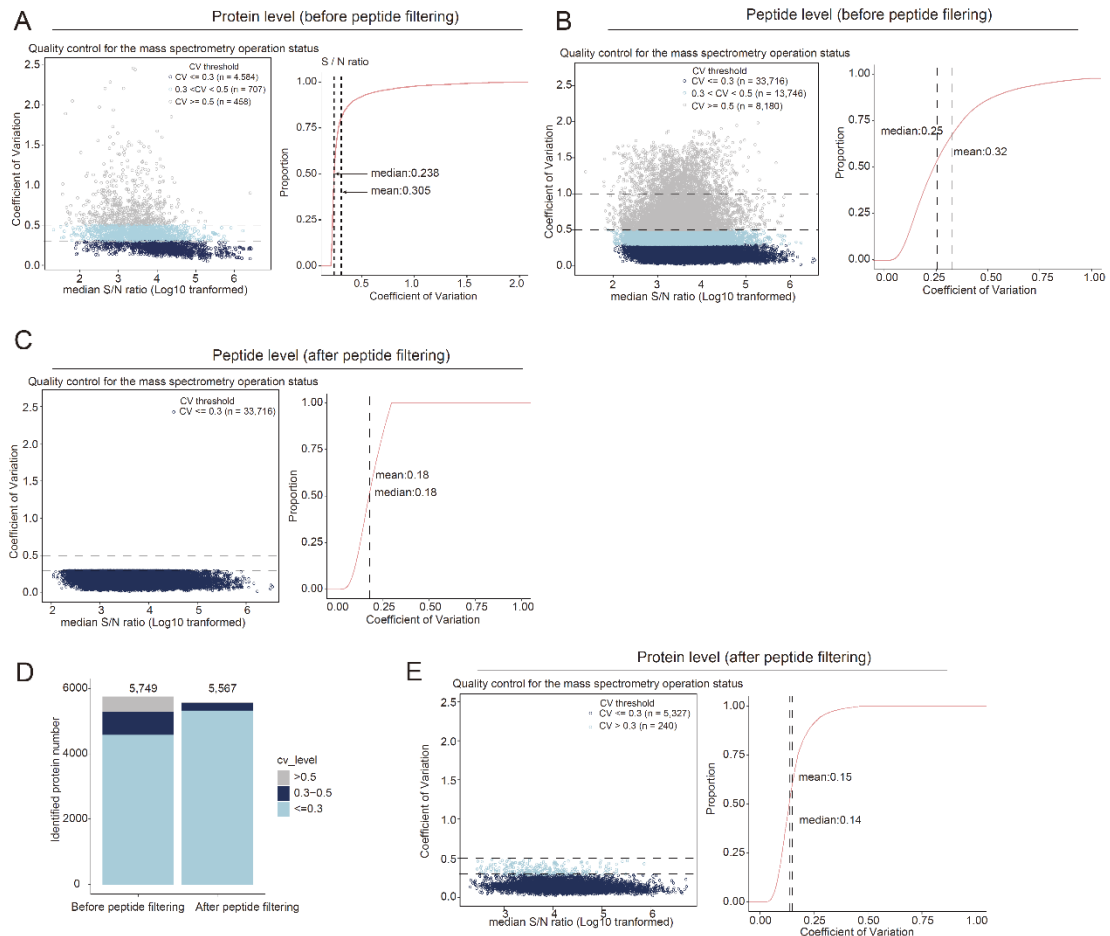

**Figure RL1. The CVs and S/N of quality control samples' peptides and proteins**

A-C and E. The left scatter plots illustrate the CV and S/N ratio of proteins/peptides identified in all HEK293 stand samples. The right cumulative distribution curves illustrate the distribution of CVs. (A) CV and S/N ratio at the protein level (before peptide filtering); (B) CV and S/N ratio at the peptide level (before peptide filtering); (C) CV and S/N ratio at the peptide level (after peptide filtering); (E) CV and S/N ratio at the protein level (after peptide filtering). (D) The bar plot presents the identified protein numbers before and after filtering the peptides.

(b) How were the numbers in Table RL6 generated? I did not look at every paper, but a median CV of 0.99 for a TMT dataset produced by Steve Carr seems completely off (PMID: 33212010). What we should consider is the median CVs of technical replicates (not across all samples analyzed in a study, this would rather be sample-dependent than method-dependent). For TMT this should be in the 0.05-0.1 range. I could not find any data in the Carr paper. This is not relevant to the reviewed manuscript, but the table seems to be off.

**Response:**

We thank the reviewer for the instructive suggestion. We apologize for the unclear presentation of the Table RL6. We agree with the reviewer that we should calculate the CVs among technical replicates, not across all samples. In the revision, we screened out the published papers, and since very few papers provided data for technical replicates, we only found the paper by Matthias Mann's group (*Nature Medicine*, PMID: 35654907) that provided quality control data. They utilized DIA methods, and the median CVs across quality assessment samples were 0.12 - 0.19, comparable to our results (our result median CV is 0.14). In the revision, we have updated the citation and revised our description on the quality control. Please see lines 164–167 in the result section, and lines 1122–1127 in the **Material and Methods** section for details.
