# Supplementary material for: Proteomic characterization identifies clinically relevant subgroups of soft tissue sarcoma
Source: Springer Nature journal article supplement (doi:10.1038/s41467-024-45306-y), 2024-02-15
Supplement: 41467_2024_45306_MOESM3_ESM.pdf [file 41467_2024_45306_MOESM3_ESM.pdf]

## **Description of Additional Supplementary Files**

**Supplementary Data 1.** Proteomic landscape of the soft tissue sarcoma cohort

**Supplementary Data 2.** Hierarchical clusters of STS histologic subtypes

**Supplementary Data 3.** Proteomics clusters of STS

**Supplementary Data 4.** Characteristic proteins and the driver pathway of the PC-Cc

**Supplementary Data 5.** Immune subtypes of STS
